# Supplementary material for: The Discovery of Acremochlorins O-R from an Acremonium sp. through Integrated Genomic and Molecular Networking
Source: MDPI journal article supplement (doi:10.3390/jof10050365), 2024-05-20
Supplement: s1 [file s1]

## *Supporting Information*

### **The Discovery of Acremochlorins O-R from an *Acremonium* sp. through Integrated Genomic and Molecular Networking**

Ge Cui <sup>1,†</sup>, Luning Zhou <sup>2,†</sup>, Hanwei Liu <sup>3</sup>, Xuan Qian <sup>1</sup>, Pengfei Yang <sup>4</sup>, Leisha Cui <sup>4</sup>, Pianpian Wang <sup>4</sup>, Dehai Li <sup>2</sup>, Jaclyn M. Winter <sup>5,\*</sup> and Guangwei Wu <sup>1,\*</sup>

<sup>1</sup> *College of Chemical Engineering, Nanjing Forestry University, Nanjing 210037, China*

<sup>2</sup> *Key Laboratory of Marine Drugs, Chinese Ministry of Education, School of Medicine and Pharmacy, Ocean University of China, 5 Yushan Road, Qingdao 266003, China*

<sup>3</sup> *Ningbo Customs District Technology Center, Ningbo 315100, China*

<sup>4</sup> *Ningbo Institute of Marine Medicine, Peking University, Ningbo 315832, China*

<sup>5</sup> *Department of Pharmacology and Toxicology, College of Pharmacy, University of Utah, Salt Lake City, UT 84112, USA*

\*Corresponding authors

E-mail addresses: gweiwu@njfu.edu.cn (Guangwei Wu); jaclyn.winter@utah.edu (Jaclyn M. Winter);

## *List of Supporting Information*

|                      |                                                                                                             |    |
|----------------------|-------------------------------------------------------------------------------------------------------------|----|
| <b>1. Figure S1.</b> | Identification of the <i>ascw</i> gene cluster in <i>Acremonium</i> sp. ....                                | 5  |
| <b>Figure S2.</b>    | GNPS Molecular Networking analysis of <i>Acremonium</i> sp. ....                                            | 6  |
| <b>Figure S3.</b>    | GNPS Molecular Networking of ASCs in <i>Acremonium</i> sp. ....                                             | 6  |
| <b>Figure S4.</b>    | HPLC identification of compounds <b>1</b> and <b>2</b> . ....                                               | 7  |
| <b>Figure S5.</b>    | Comparison of <sup>1</sup> H NMR spectra of compounds <b>1</b> and <b>2</b> in CDCl <sub>3</sub> . ....     | 7  |
| <b>2. Figure S6.</b> | <sup>1</sup> H NMR (600 MHz) spectrum of compound <b>1</b> in CDCl <sub>3</sub> . ....                      | 8  |
| <b>Figure S7.</b>    | <sup>13</sup> C NMR (600 MHz) spectrum of compound <b>1</b> in CDCl <sub>3</sub> . ....                     | 9  |
| <b>Figure S8.</b>    | HSQC NMR (600 MHz) spectrum of compound <b>1</b> in CDCl <sub>3</sub> . ....                                | 10 |
| <b>Figure S9.</b>    | HMBC NMR (600 MHz) spectrum of compound <b>1</b> in CDCl <sub>3</sub> . ....                                | 11 |
| <b>Figure S10.</b>   | <sup>1</sup> H- <sup>1</sup> H COSY NMR (600 MHz) spectrum of compound <b>1</b> in CDCl <sub>3</sub> . .... | 12 |
| <b>Figure S11.</b>   | NOESY NMR (600 MHz) spectrum of compound <b>1</b> in CDCl <sub>3</sub> . ....                               | 13 |
| <b>Figure S12.</b>   | 1D NOE Spectrum of <b>1</b> in CDCl <sub>3</sub> (H-13, δ <sub>H</sub> = 1.44 ppm). ....                    | 14 |
| <b>Figure S13.</b>   | 1D NOE Spectrum of <b>1</b> in CDCl <sub>3</sub> (H-15, δ <sub>H</sub> = 1.94 ppm). ....                    | 15 |
| <b>Figure S14.</b>   | 1D NOE Spectrum of <b>1</b> in CDCl <sub>3</sub> (H-19, δ <sub>H</sub> = 2.44 ppm). ....                    | 16 |
| <b>Figure S15.</b>   | <sup>1</sup> H NMR (600 MHz) spectrum of compound <b>1</b> in DMSO. ....                                    | 17 |
| <b>Figure S16.</b>   | IR spectrum of compound <b>1</b> . ....                                                                     | 18 |
| <b>Figure S17.</b>   | HR-ESIMS of compound <b>1</b> . ....                                                                        | 19 |
| <b>3. Figure S18</b> | <sup>1</sup> H NMR (600 MHz) spectrum of compound <b>2</b> in CDCl <sub>3</sub> . ....                      | 20 |
| <b>Figure S19.</b>   | <sup>13</sup> C NMR (600 MHz) spectrum of compound <b>2</b> in CDCl <sub>3</sub> . ....                     | 21 |
| <b>Figure S20.</b>   | HSQC NMR (600 MHz) spectrum of compound <b>2</b> in CDCl <sub>3</sub> . ....                                | 22 |
| <b>Figure S21.</b>   | HMBC NMR (600 MHz) spectrum of compound <b>2</b> in CDCl <sub>3</sub> . ....                                | 23 |
| <b>Figure S22.</b>   | <sup>1</sup> H- <sup>1</sup> H COSY NMR (600 MHz) spectrum of compound <b>2</b> in CDCl <sub>3</sub> . .... | 24 |
| <b>Figure S23.</b>   | NOESY NMR (600 MHz) spectrum of compound <b>2</b> in CDCl <sub>3</sub> . ....                               | 25 |

|           |                                                                                                                                |    |
|-----------|--------------------------------------------------------------------------------------------------------------------------------|----|
|           | <b>Figure S24.</b> 1D NOE Spectrum of <b>2</b> in CDCl <sub>3</sub> (H-13, $\delta_{\text{H}}$ = 1.44 ppm).....                | 26 |
|           | <b>Figure S25.</b> 1D NOE Spectrum of <b>2</b> in CDCl <sub>3</sub> (H-15, $\delta_{\text{H}}$ = 1.97 ppm).....                | 27 |
|           | <b>Figure S26.</b> 1D NOE Spectrum of <b>2</b> in CDCl <sub>3</sub> (H-19, $\delta_{\text{H}}$ = 2.40 ppm).....                | 28 |
|           | <b>Figure S27.</b> <sup>1</sup> H NMR (600 MHz) spectrum of compound <b>2</b> in DMSO. ....                                    | 29 |
|           | <b>Figure S28.</b> IR spectrum of compound <b>2</b> . ....                                                                     | 30 |
|           | <b>Figure S29.</b> HR-ESIMS of compound <b>2</b> . ....                                                                        | 31 |
| <b>4.</b> | <b>Figure S30.</b> <sup>1</sup> H NMR (600 MHz) spectrum of compound <b>3</b> in CDCl <sub>3</sub> . ....                      | 32 |
|           | <b>Figure S31.</b> <sup>13</sup> C NMR (600 MHz) spectrum of compound <b>3</b> in CDCl <sub>3</sub> . ....                     | 33 |
|           | <b>Figure S32.</b> HSQC NMR (600 MHz) spectrum of compound <b>3</b> in CDCl <sub>3</sub> .....                                 | 34 |
|           | <b>Figure S33.</b> HMBC NMR (600 MHz) spectrum of compound <b>3</b> in CDCl <sub>3</sub> .....                                 | 35 |
|           | <b>Figure S34.</b> <sup>1</sup> H- <sup>1</sup> H COSY NMR (600 MHz) spectrum of compound <b>3</b> in CDCl <sub>3</sub> . .... | 36 |
|           | <b>Figure S35.</b> NOESY NMR (600 MHz) spectrum of compound <b>3</b> in CDCl <sub>3</sub> . ....                               | 37 |
|           | <b>Figure S36.</b> IR spectrum of compound <b>3</b> . ....                                                                     | 38 |
|           | <b>Figure S37.</b> HR-ESIMS of compound <b>3</b> . ....                                                                        | 39 |
| <b>5.</b> | <b>Figure S38.</b> <sup>1</sup> H NMR (600 MHz) spectrum of compound <b>4</b> in CDCl <sub>3</sub> . ....                      | 40 |
|           | <b>Figure S39.</b> <sup>13</sup> C NMR (600 MHz) spectrum of compound <b>4</b> in CDCl <sub>3</sub> . ....                     | 41 |
|           | <b>Figure S40.</b> HSQC NMR (600 MHz) spectrum of compound <b>4</b> in CDCl <sub>3</sub> .....                                 | 42 |
|           | <b>Figure S41.</b> HMBC NMR (600 MHz) spectrum of compound <b>4</b> in CDCl <sub>3</sub> .....                                 | 43 |
|           | <b>Figure S42.</b> <sup>1</sup> H- <sup>1</sup> H COSY NMR (600 MHz) spectrum of compound <b>4</b> in CDCl <sub>3</sub> . .... | 44 |
|           | <b>Figure S43.</b> NOESY NMR (600 MHz) spectrum of compound <b>4</b> in CDCl <sub>3</sub> . ....                               | 45 |
|           | <b>Figure S44.</b> IR spectrum of compound <b>4</b> . ....                                                                     | 46 |
|           | <b>Figure S45.</b> HR-ESIMS of compound <b>4</b> . ....                                                                        | 47 |
| <b>6.</b> | <b>Figure S46.</b> <sup>1</sup> H NMR (600 MHz) spectrum of compound <b>5</b> in CDCl <sub>3</sub> . ....                      | 48 |

|                                                                                                                                                 |    |
|-------------------------------------------------------------------------------------------------------------------------------------------------|----|
| <b>Figure S47.</b> $^{13}\text{C}$ NMR (600 MHz) spectrum of compound <b>5</b> in $\text{CDCl}_3$ . .....                                       | 49 |
| <b>Figure S48.</b> HSQC NMR (600 MHz) spectrum of compound <b>5</b> in $\text{CDCl}_3$ . .....                                                  | 50 |
| <b>Figure S49.</b> HMBC NMR (600 MHz) spectrum of compound <b>5</b> in $\text{CDCl}_3$ . .....                                                  | 51 |
| <b>Figure S50.</b> IR spectrum of compound <b>5</b> . .....                                                                                     | 52 |
| <b>Figure S51.</b> HR-ESIMS of compound <b>5</b> . .....                                                                                        | 53 |
| <b>7. Table S1.</b> Bacterial strains used in the antimicrobial screening assays. ....                                                          | 54 |
| <b>Table S2.</b> Cartesian coordinates of the low energy reoptimized conformers of <b>1</b> calculated at B3LYP/6 31+G(d) level of theory. .... | 55 |
| <b>Table S3.</b> Cartesian coordinates of the low energy reoptimized conformers of <b>2</b> calculated at B3LYP/6 31+G(d) level of theory. .... | 58 |

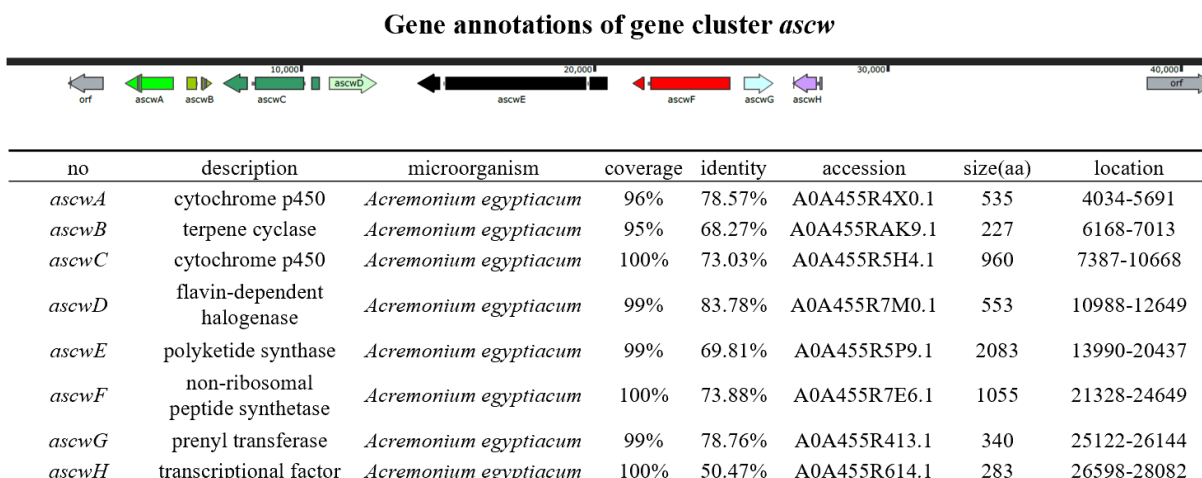

**Figure S1.** Identification of the *ascw* gene cluster in *Acremonium* sp. (GenBank Accession number PP795974).

Gene annotations of gene cluster *ascw* which was discovered by antiSMASH ( <https://antismash.secondarymetabolites.org/#!/start> ) and predicted at softberry ( <https://www.softberry.com/>).

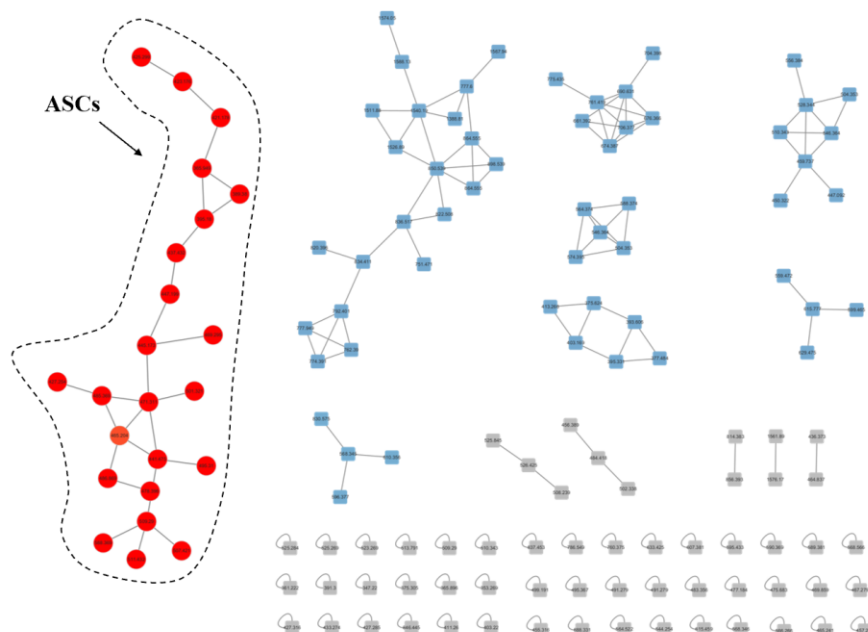

**Figure S2.** GNPS Molecular Networking analysis of *Acremonium* sp.

The resultant networking is visualized in Cytoscape (version 3.6.1), where one node represents one consensus MS-MS spectrum and is labeled with the precursor mass. The figure above shows the analysis results of the crude extract. The red node is a cluster of ASCs compounds, among them, the blue nodes represent compounds that form clusters. Grey nodes represent some unknown and individual compounds.

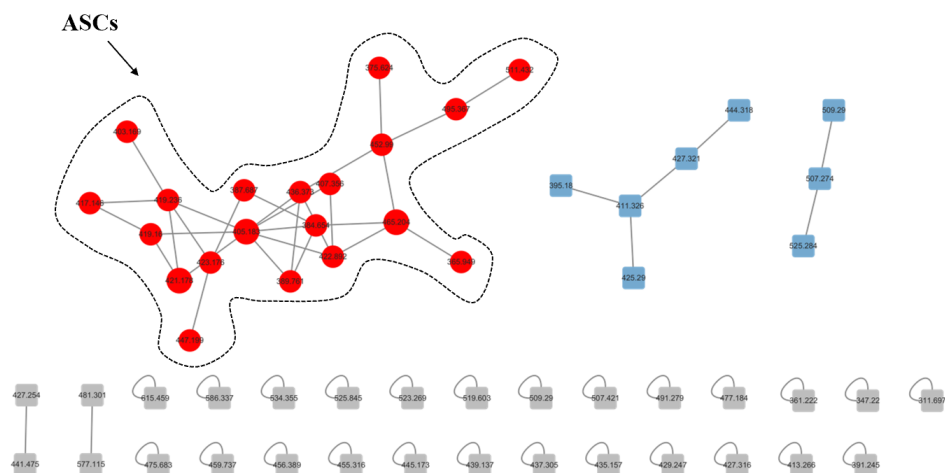

**Figure S3.** GNPS Molecular Networking of ASCs in *Acremonium* sp.

The figure above shows the analysis results of Fraction 2 which was eluted with 100% dichloromethane. The specific colors have the same meanings as in Figure 2.

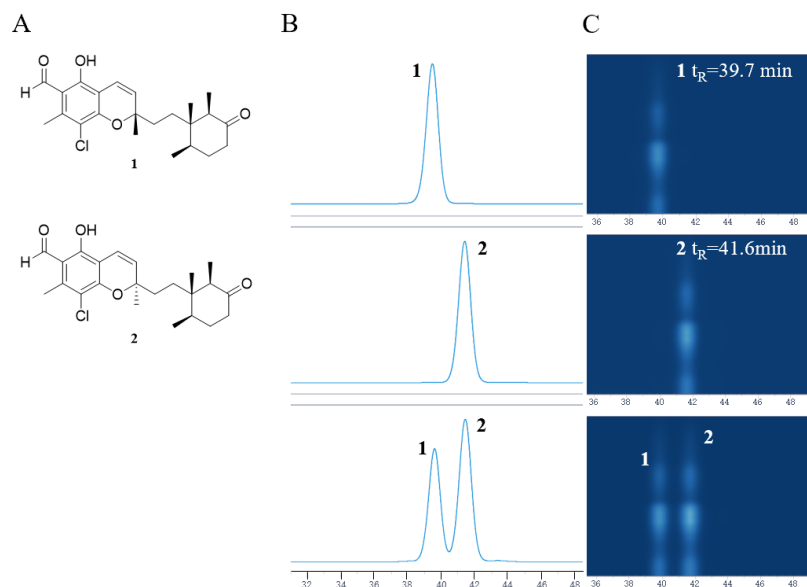

**Figure S4.** HPLC identification of compounds **1** and **2**.

(A) Structure of compounds **1** and **2**; (B) Retention times of compounds **1** and **2** via HPLC (65:35 MeCN–H<sub>2</sub>O with 0.1% Formic acid, 1 mL/min, 270 nm) using an ODS column (X-bridge C<sub>18</sub> column, 4.6 × 250 mm, 5 μm); (C) UV full wavelength scan spectra of compounds **1** and **2**.

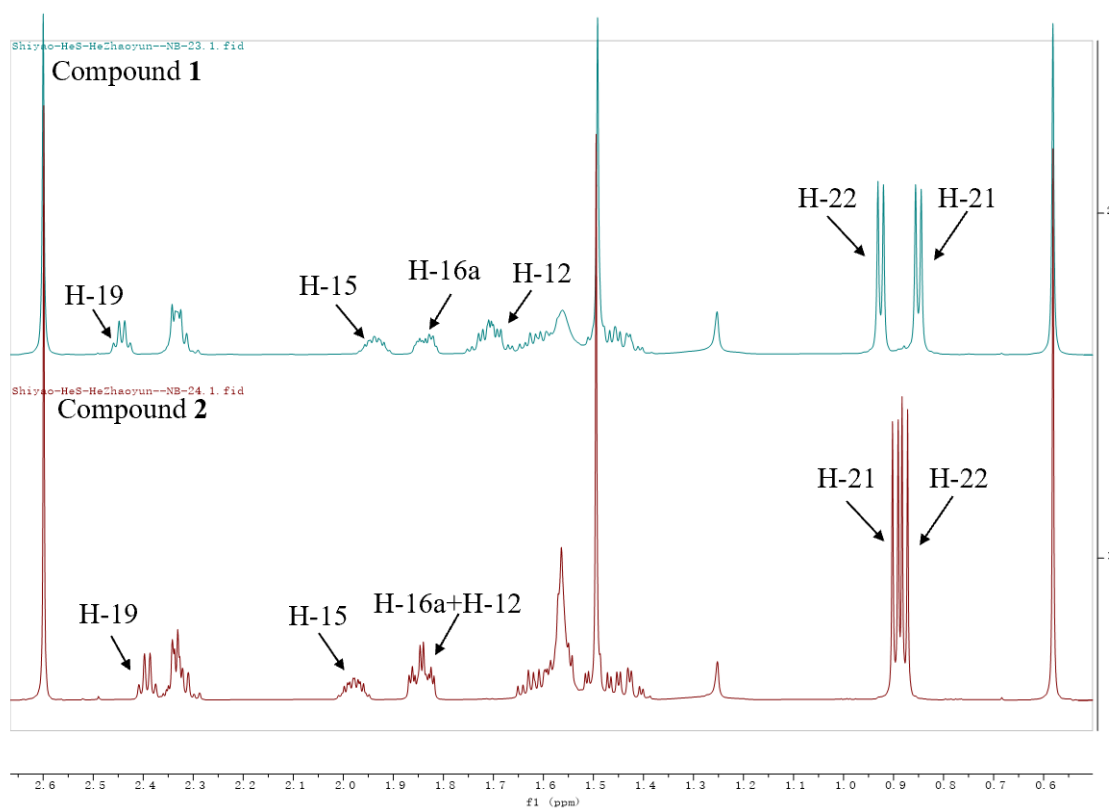

**Figure S5.** Comparison of <sup>1</sup>H NMR spectra of compounds **1** and **2** in CDCl<sub>3</sub>.

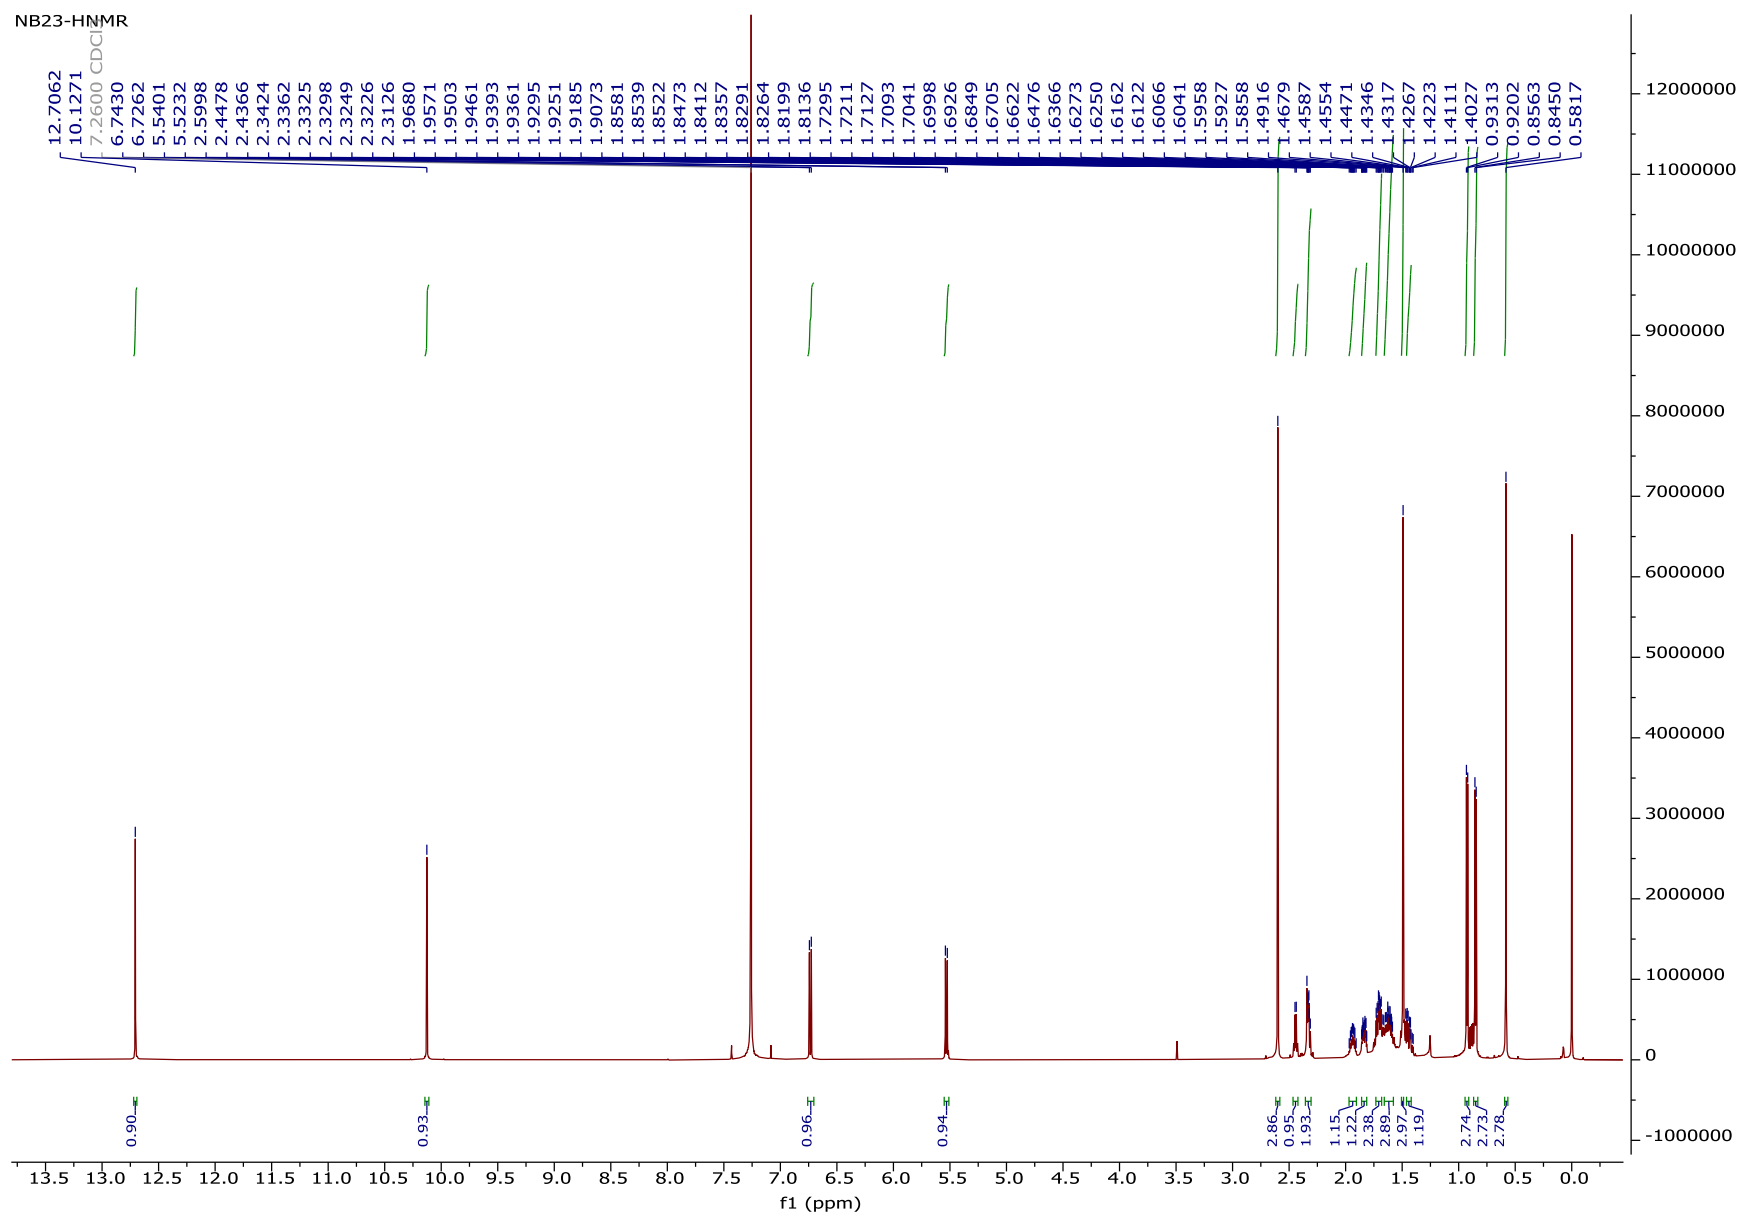

**Figure S6.**  $^1\text{H}$  NMR Spectrum of **1** in  $\text{CDCl}_3$ .



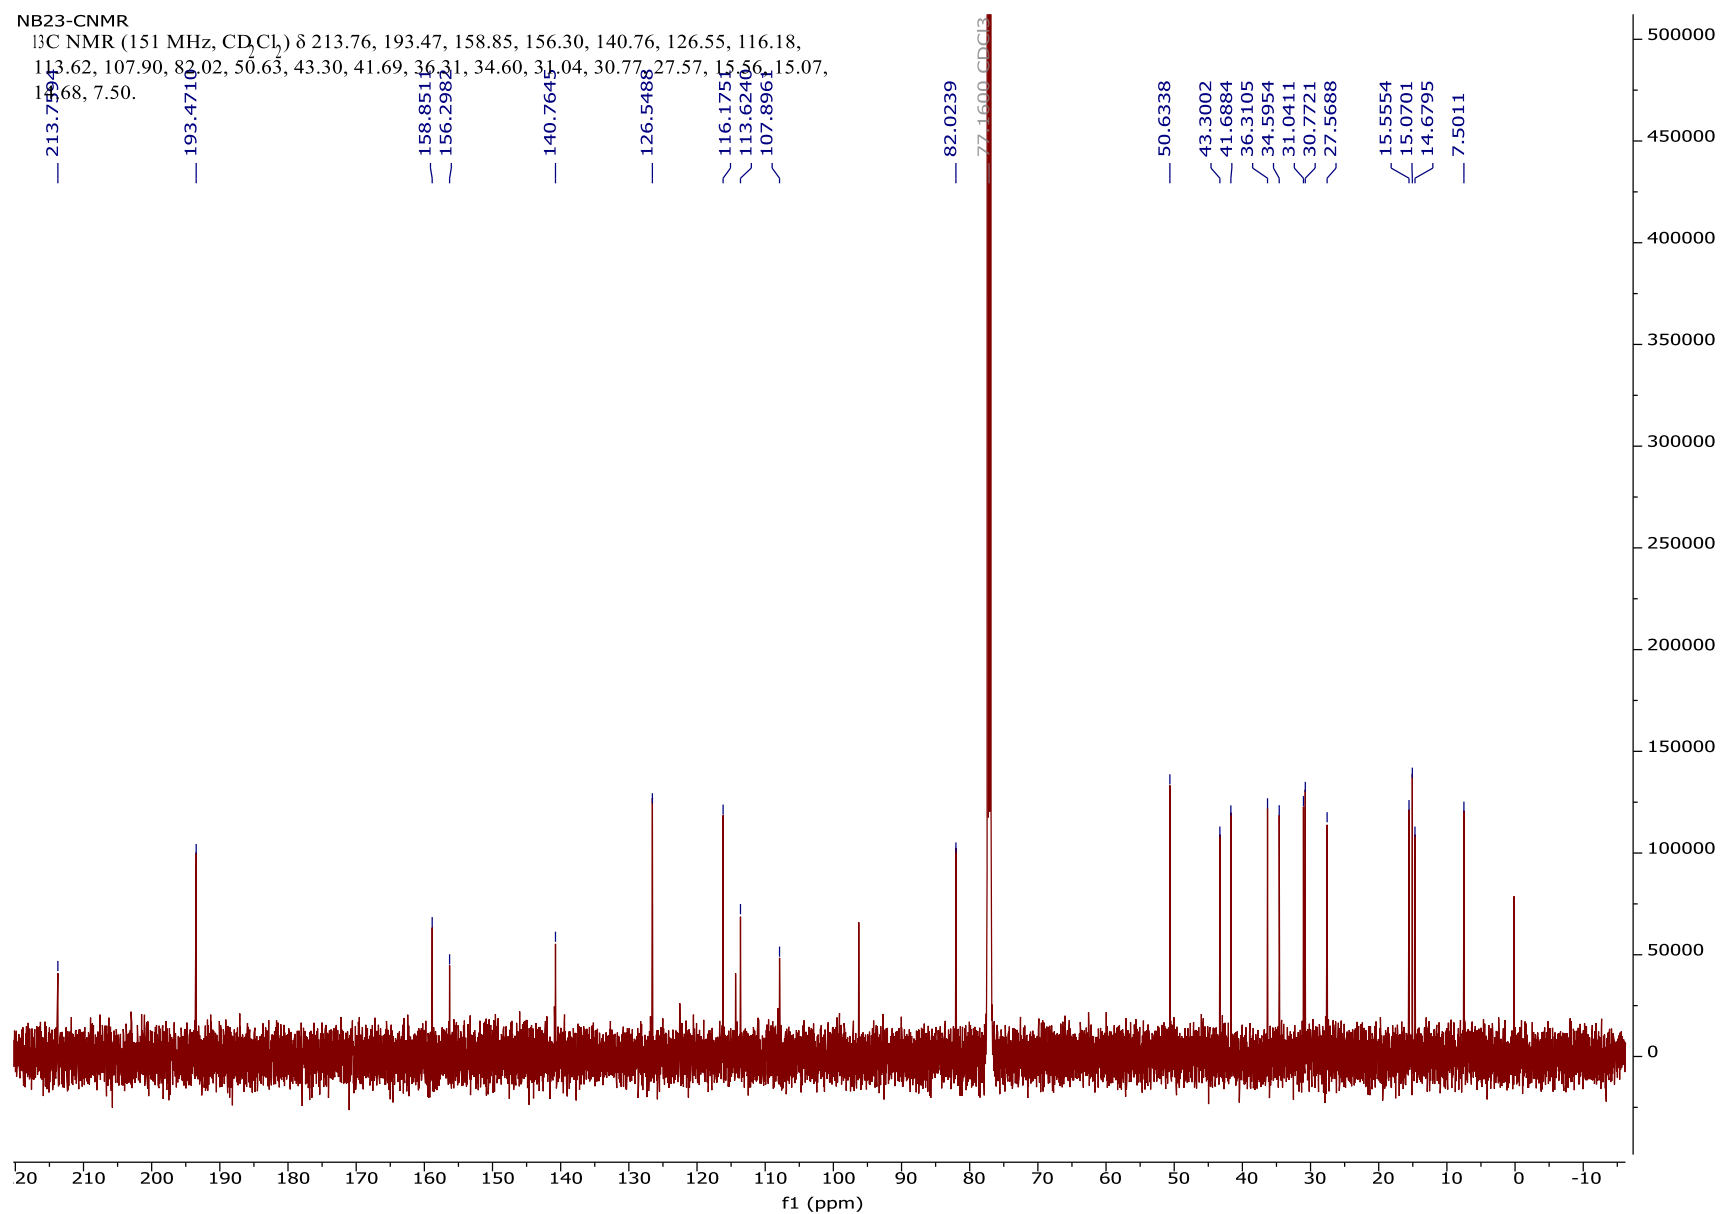

**Figure S7.**  $^{13}\text{C}$  NMR Spectrum of **1** in  $\text{CDCl}_3$ .

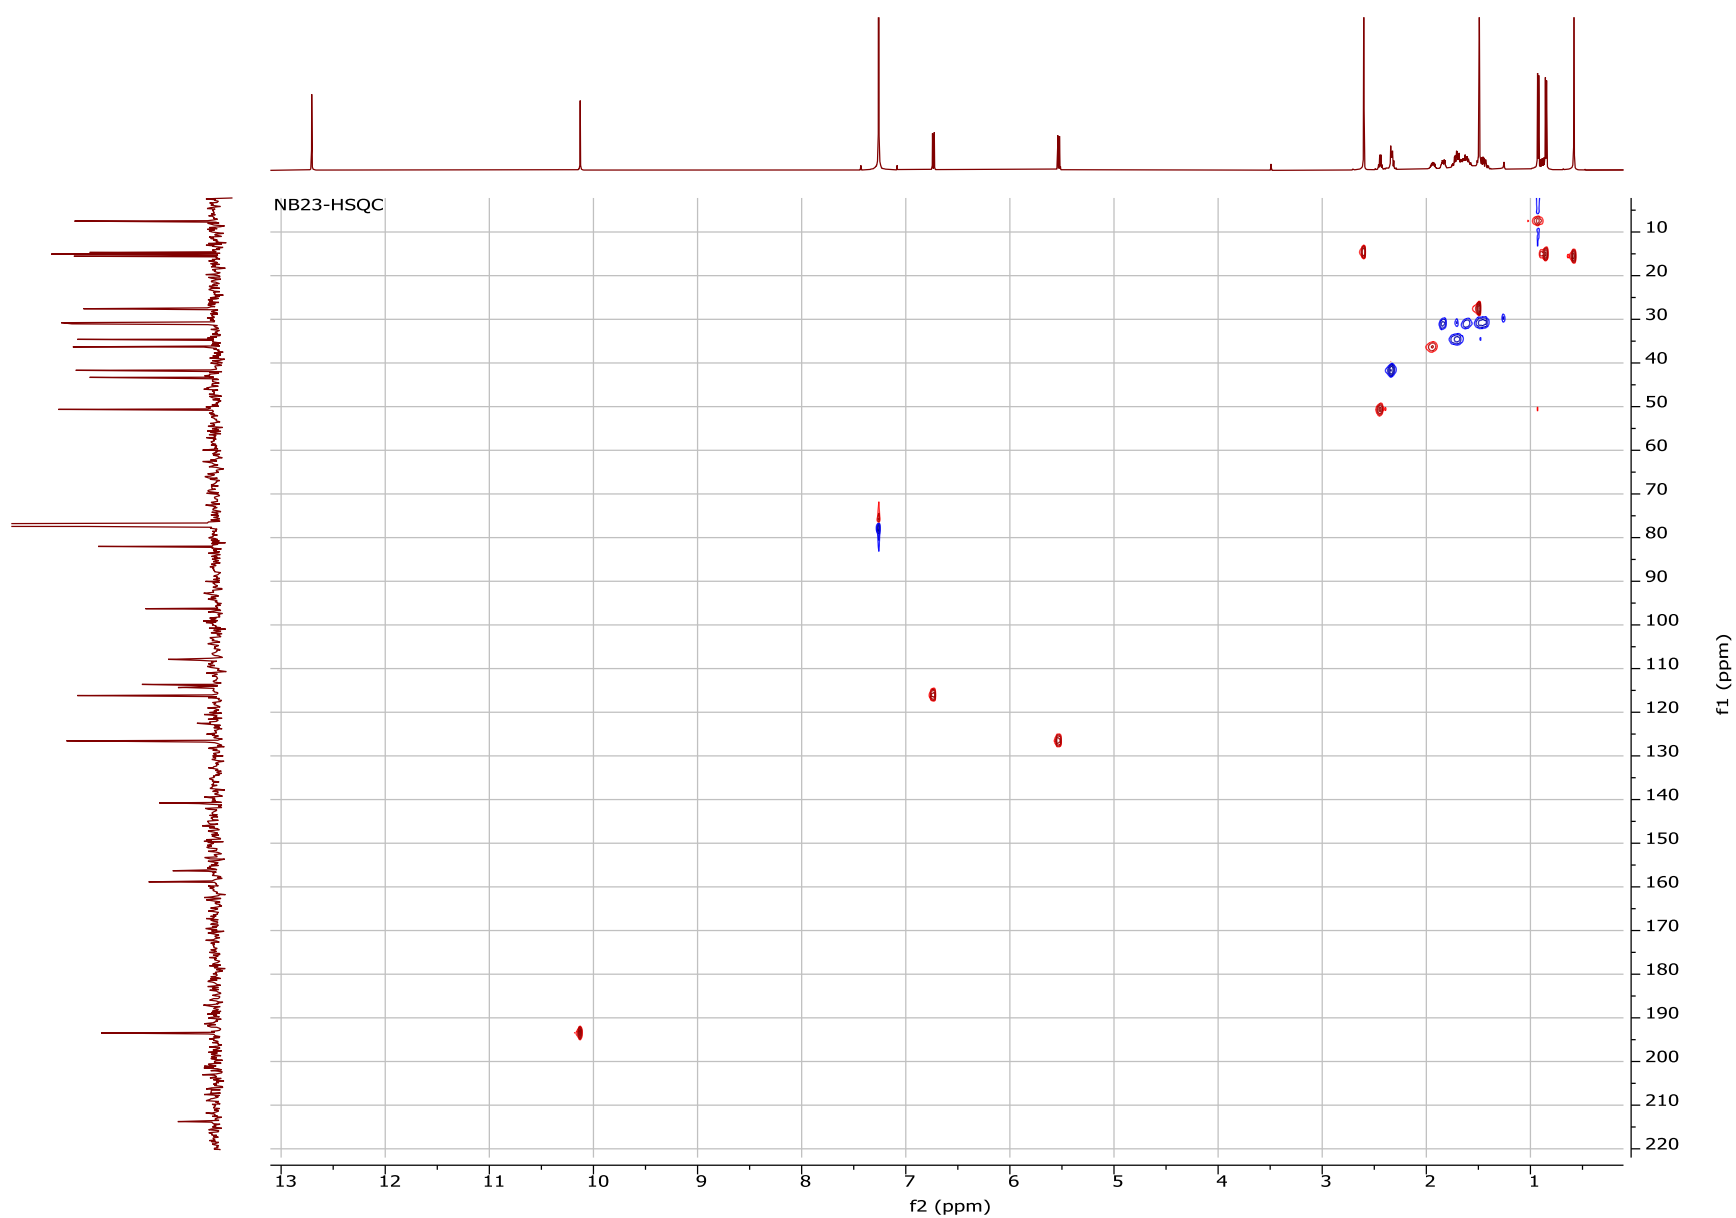

**Figure S8.** HSQC Spectrum of **1** in CDCl<sub>3</sub>.

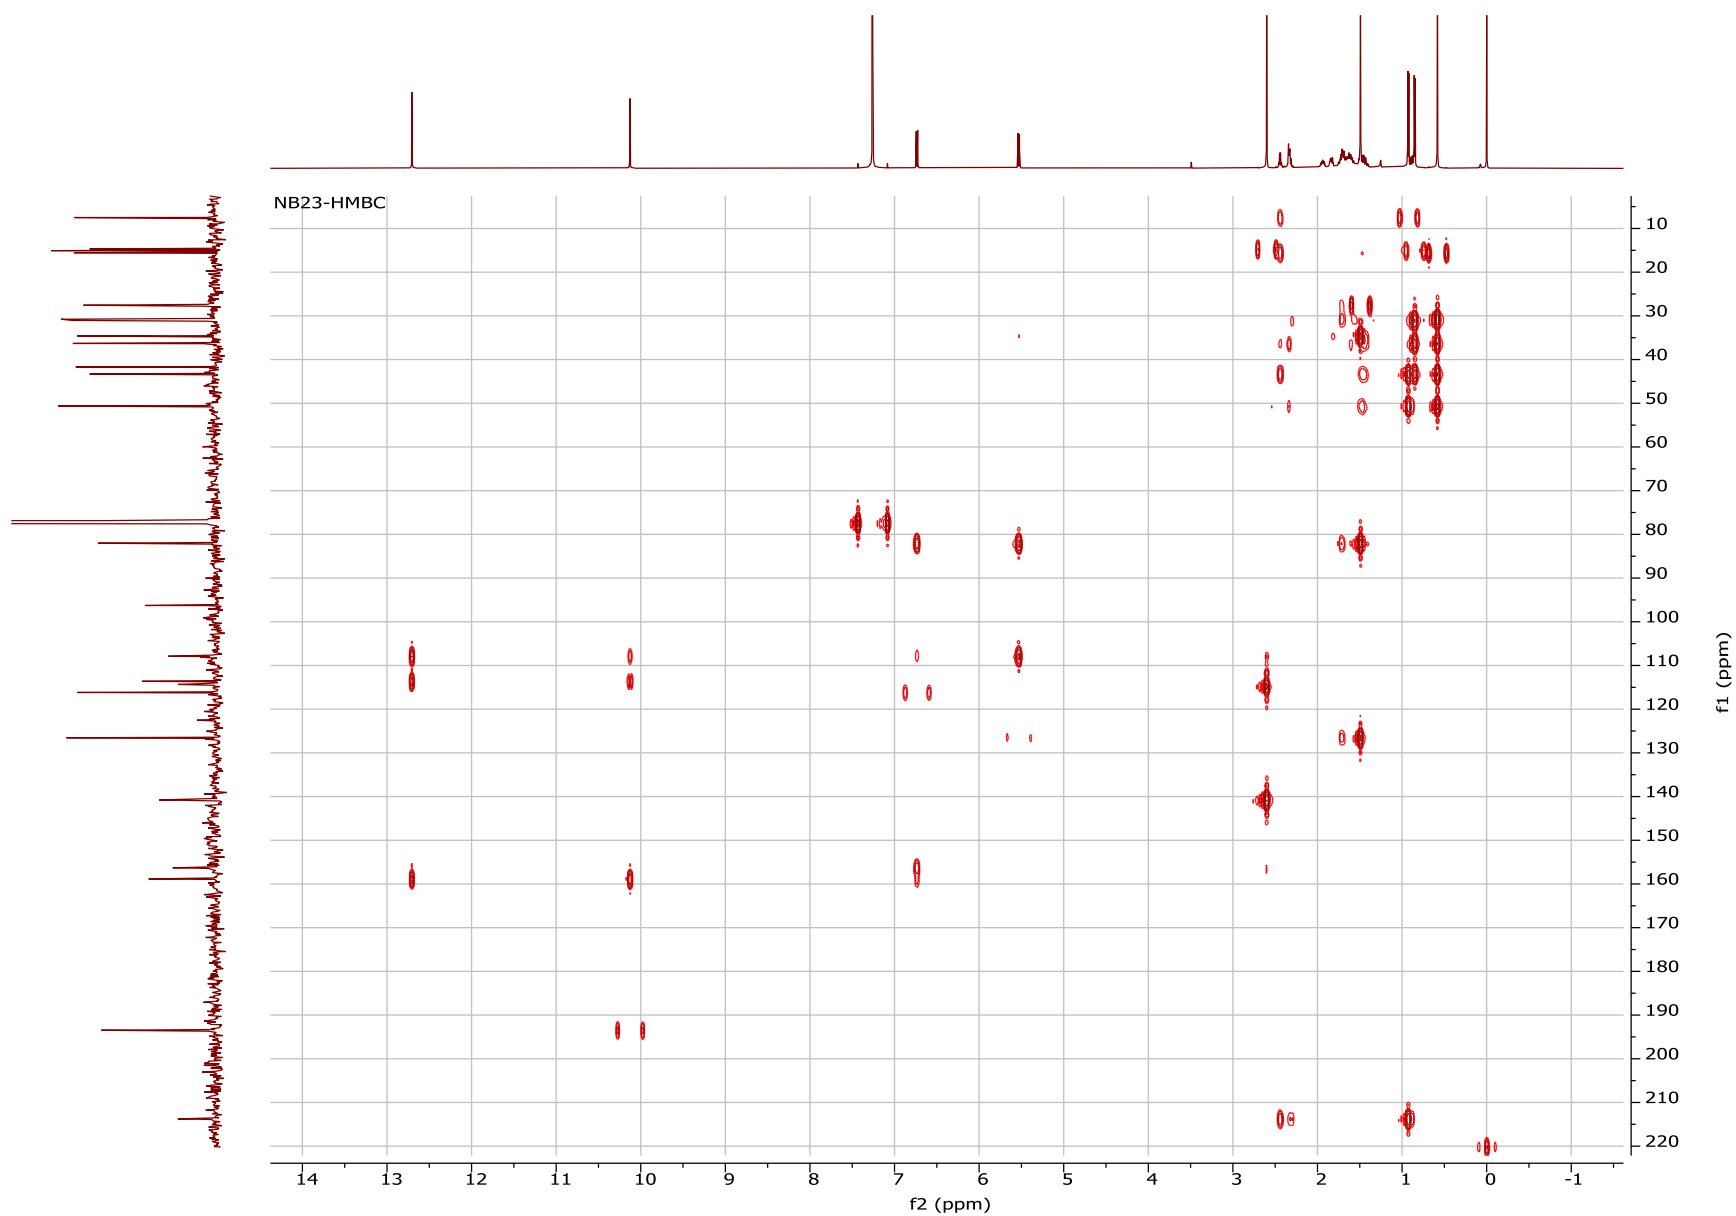

**Figure S9.** HMBC Spectrum of **1** in  $\text{CDCl}_3$ .

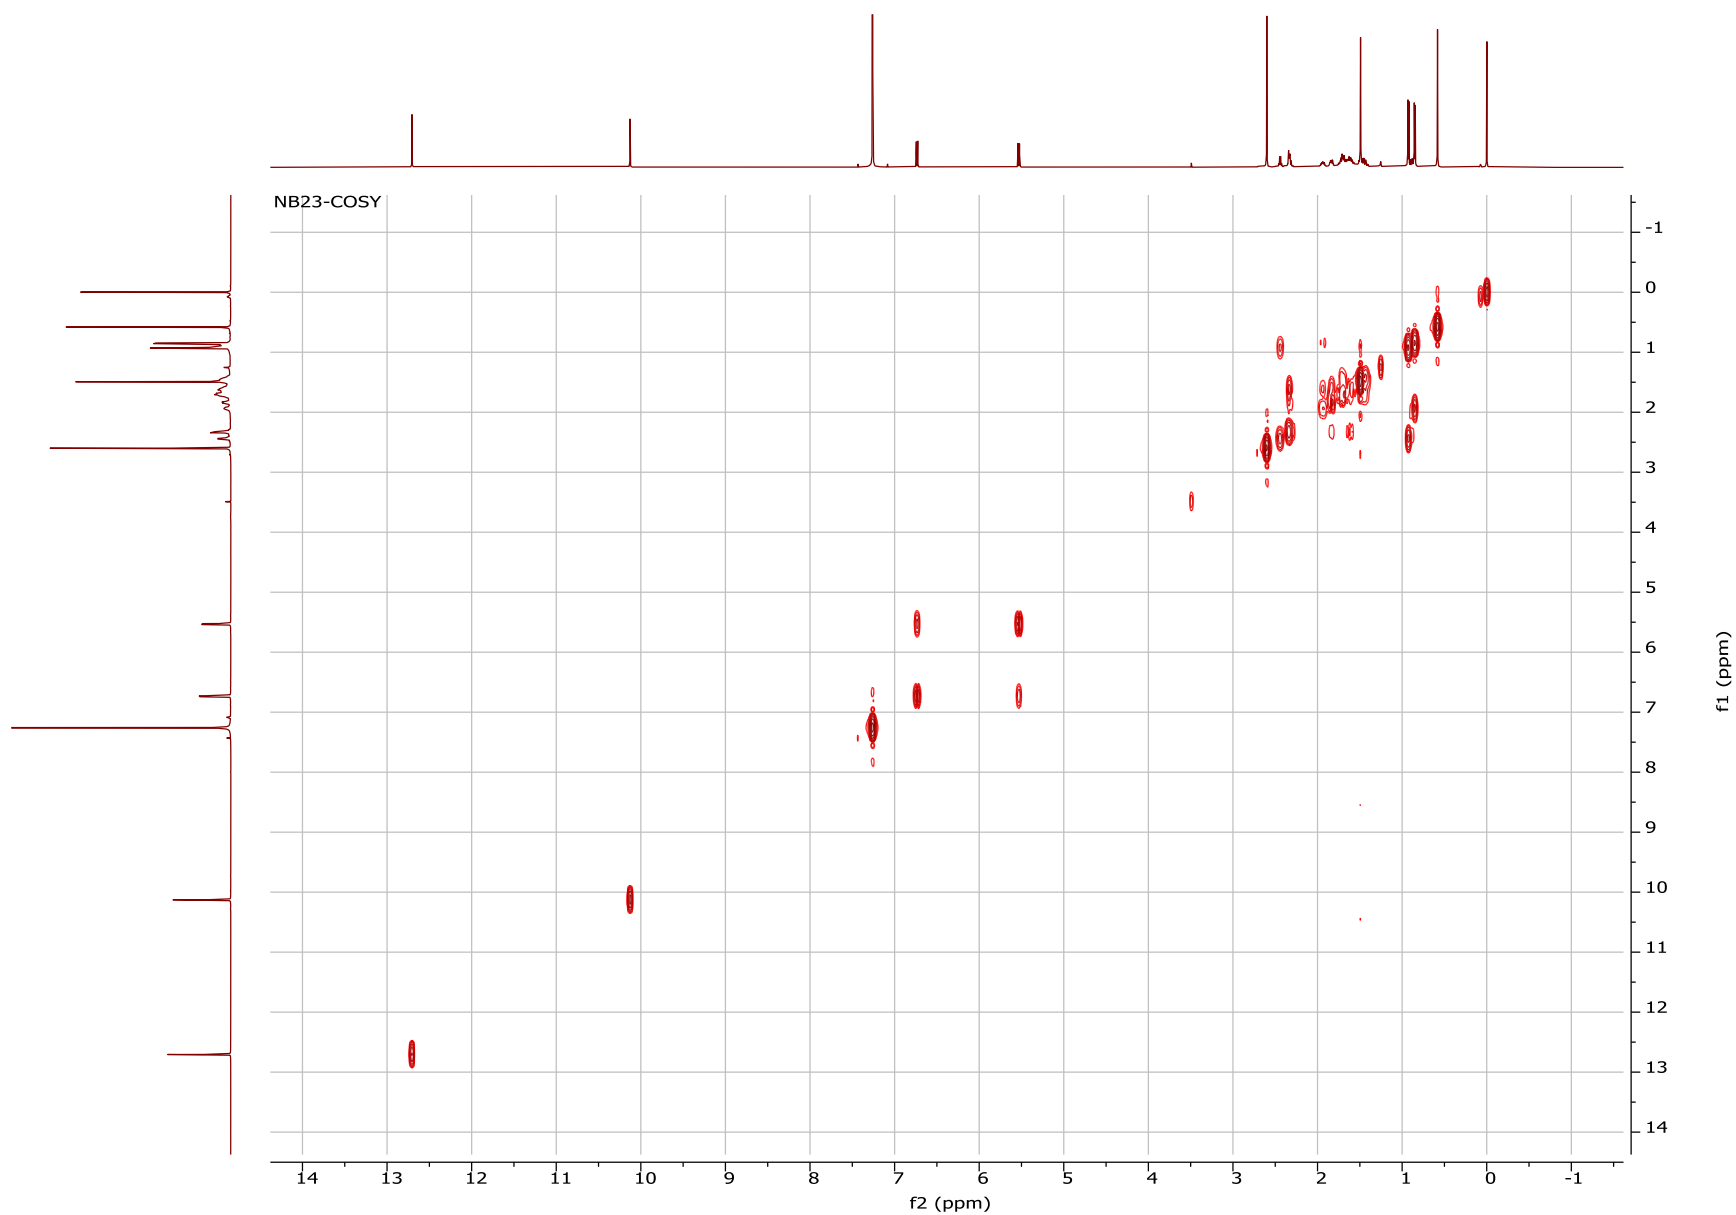

**Figure S10.** COSY Spectrum of **1** in CDCl<sub>3</sub>.

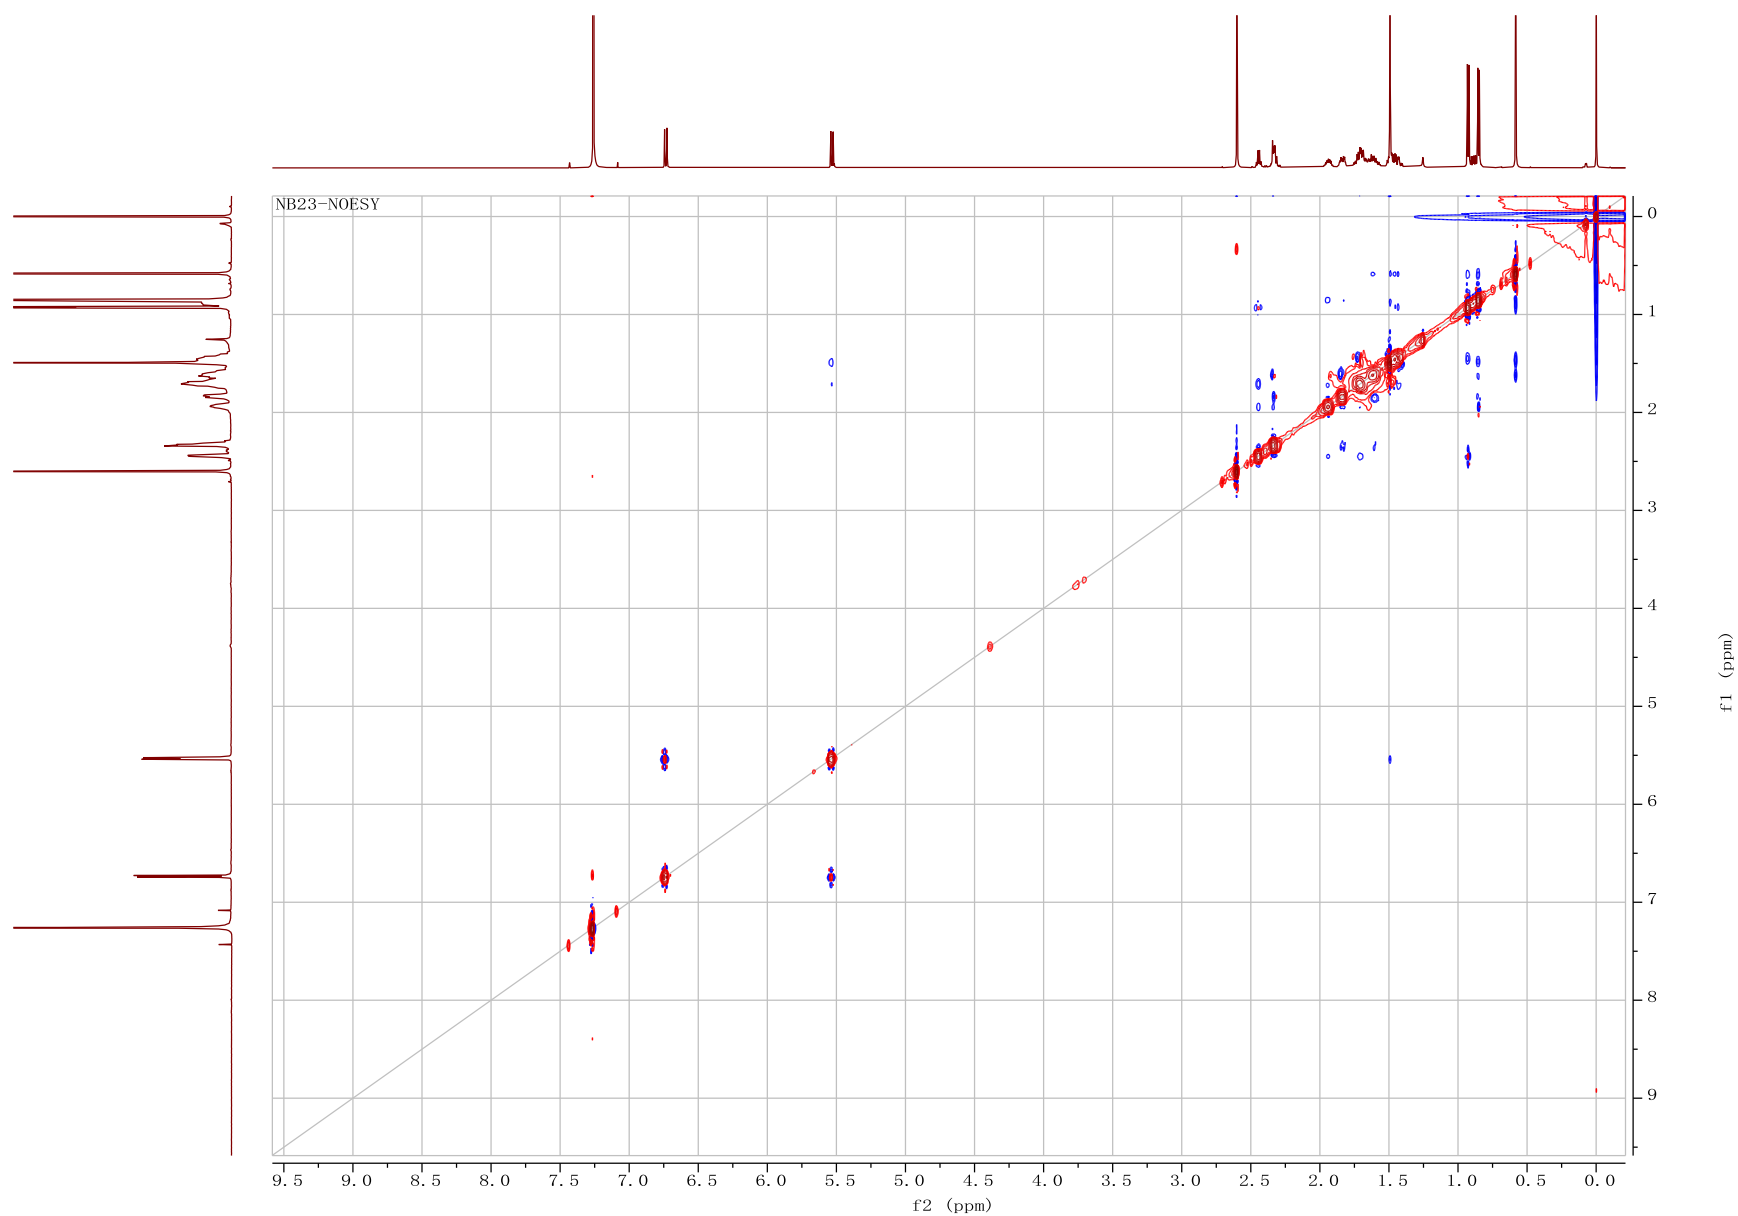

**Figure S11.** NOESY Spectrum of **1** in CDCl<sub>3</sub>.

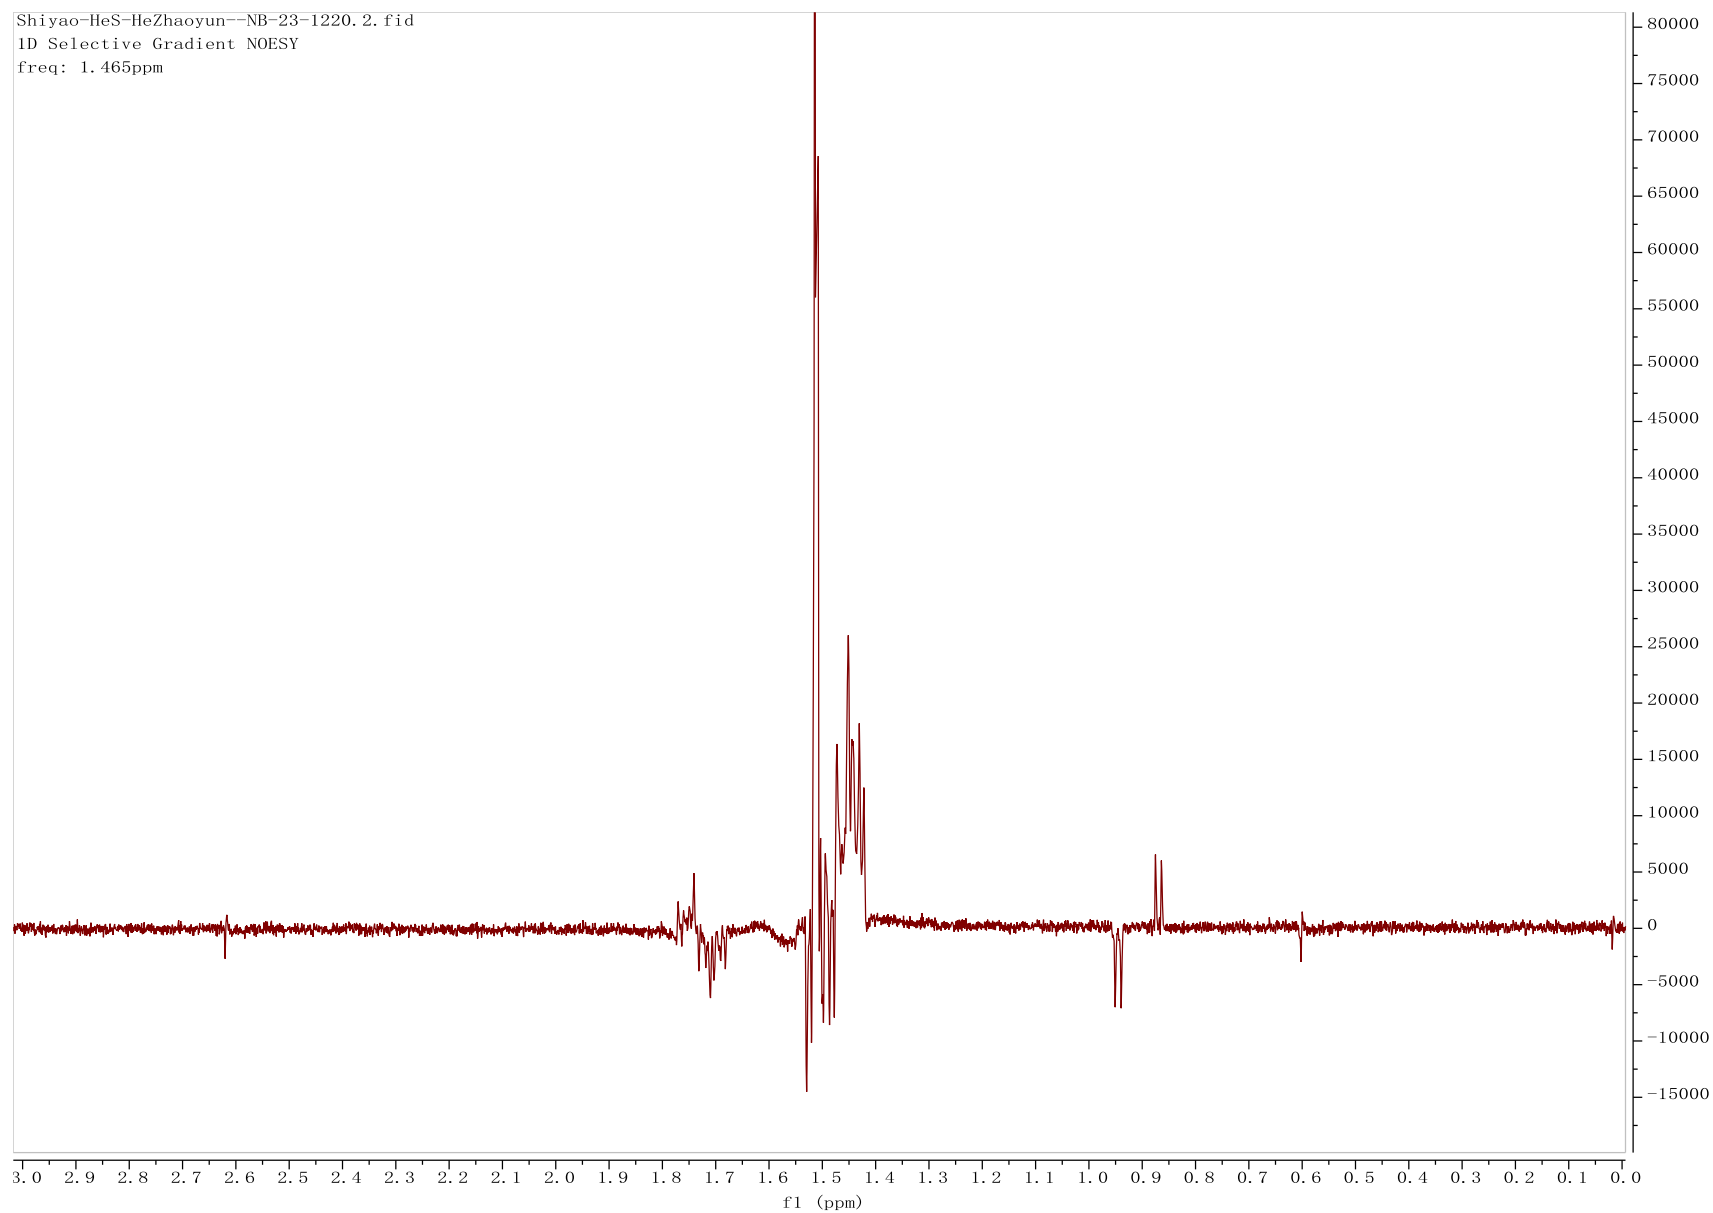

**Figure S12.** 1D NOE Spectrum of **1** in  $\text{CDCl}_3$  ( $\text{H-13}$ ,  $\delta_{\text{H}} = 1.44$  ppm)

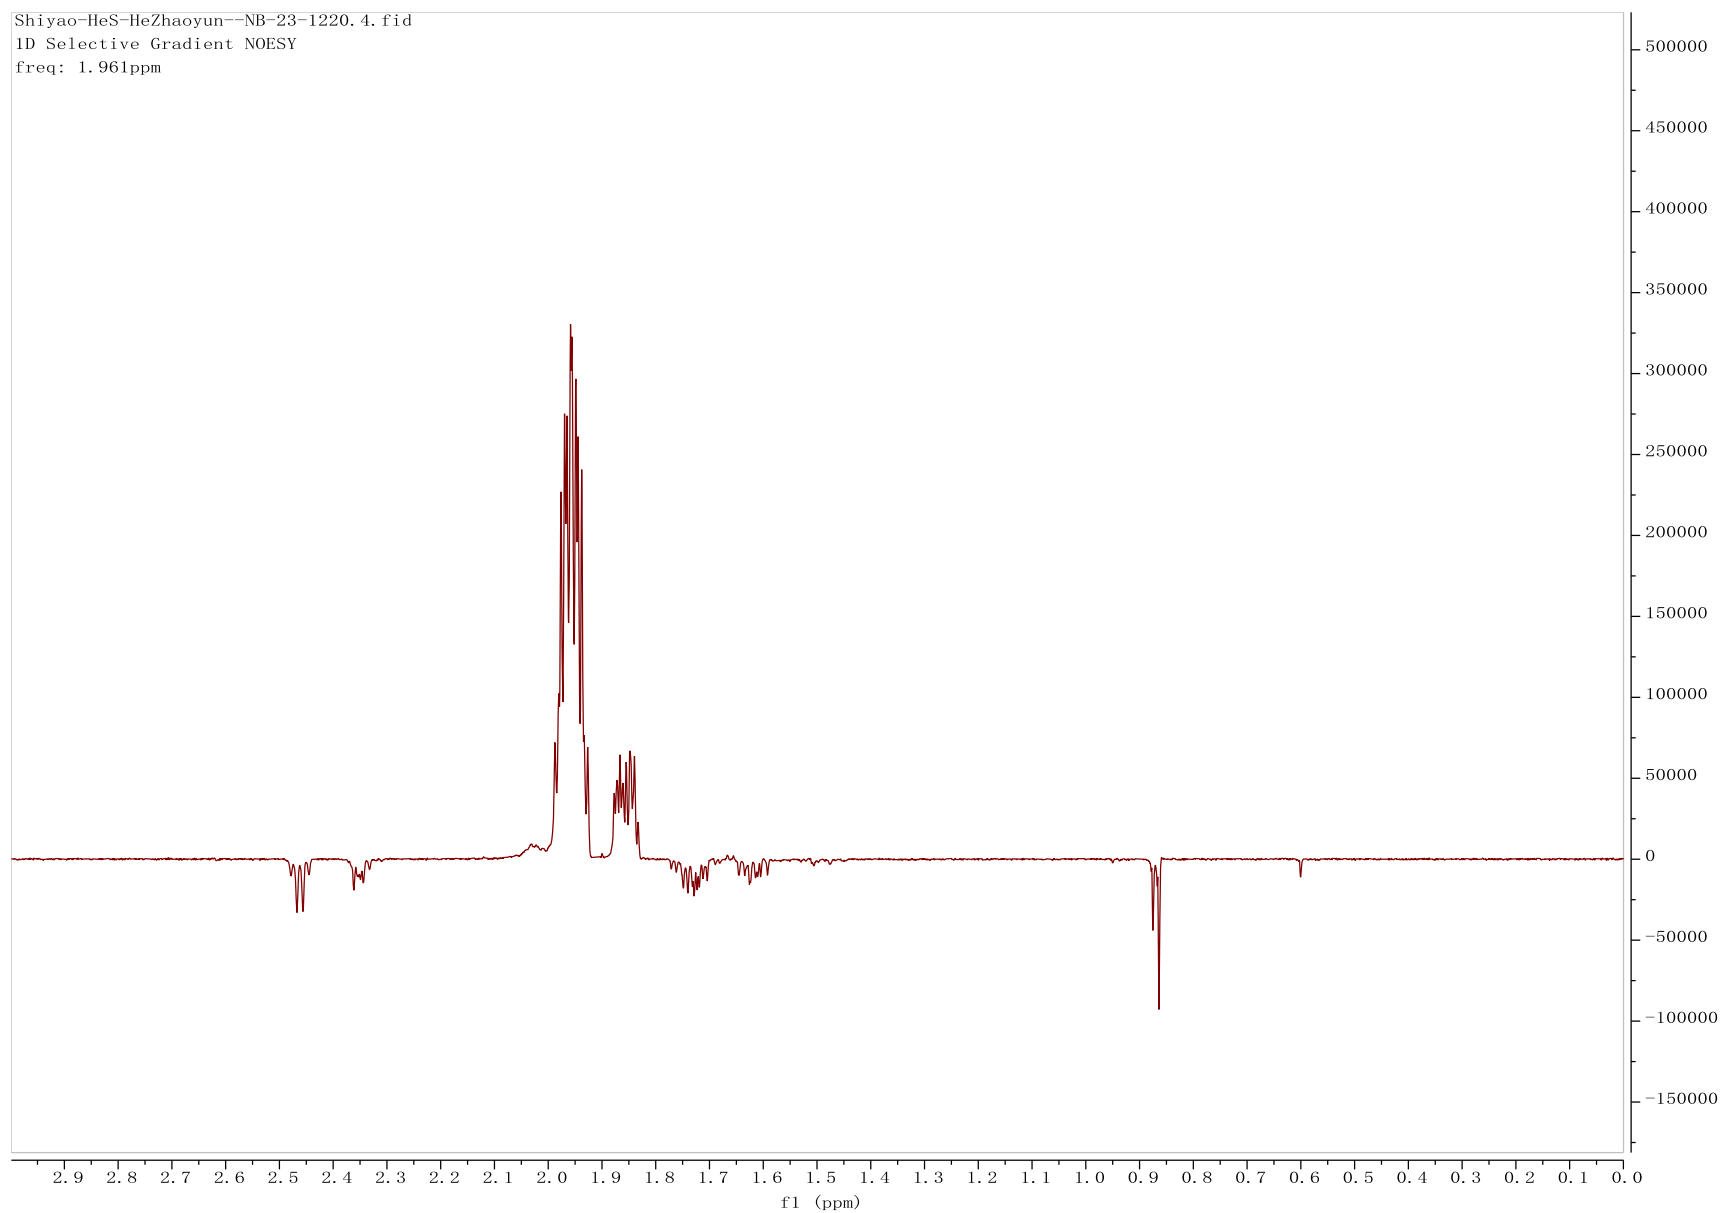

**Figure S13.** 1D NOE Spectrum of **1** in  $\text{CDCl}_3$  ( $\text{H-15}$ ,  $\delta_{\text{H}} = 1.94$  ppm)

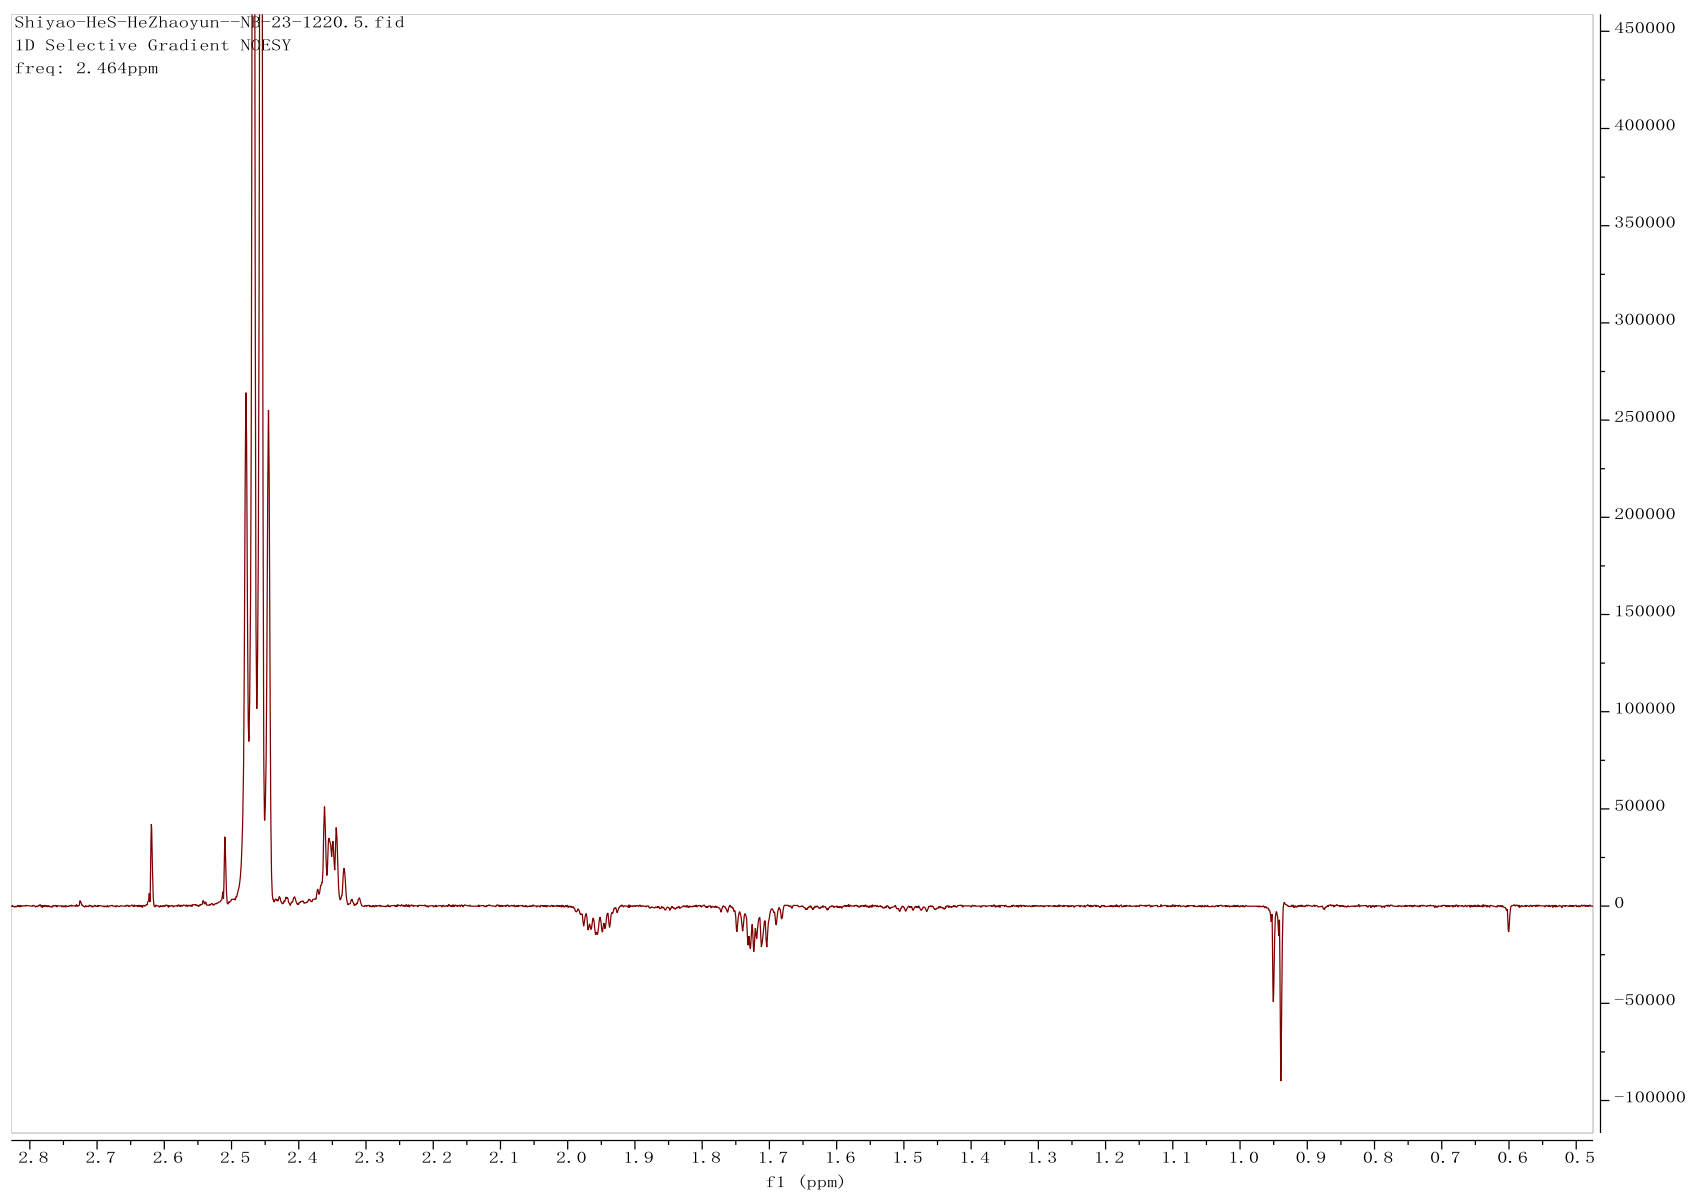

**Figure S14.** 1D NOE Spectrum of **1** in  $\text{CDCl}_3$  ( $\text{H-19}$ ,  $\delta_{\text{H}} = 2.44$  ppm)



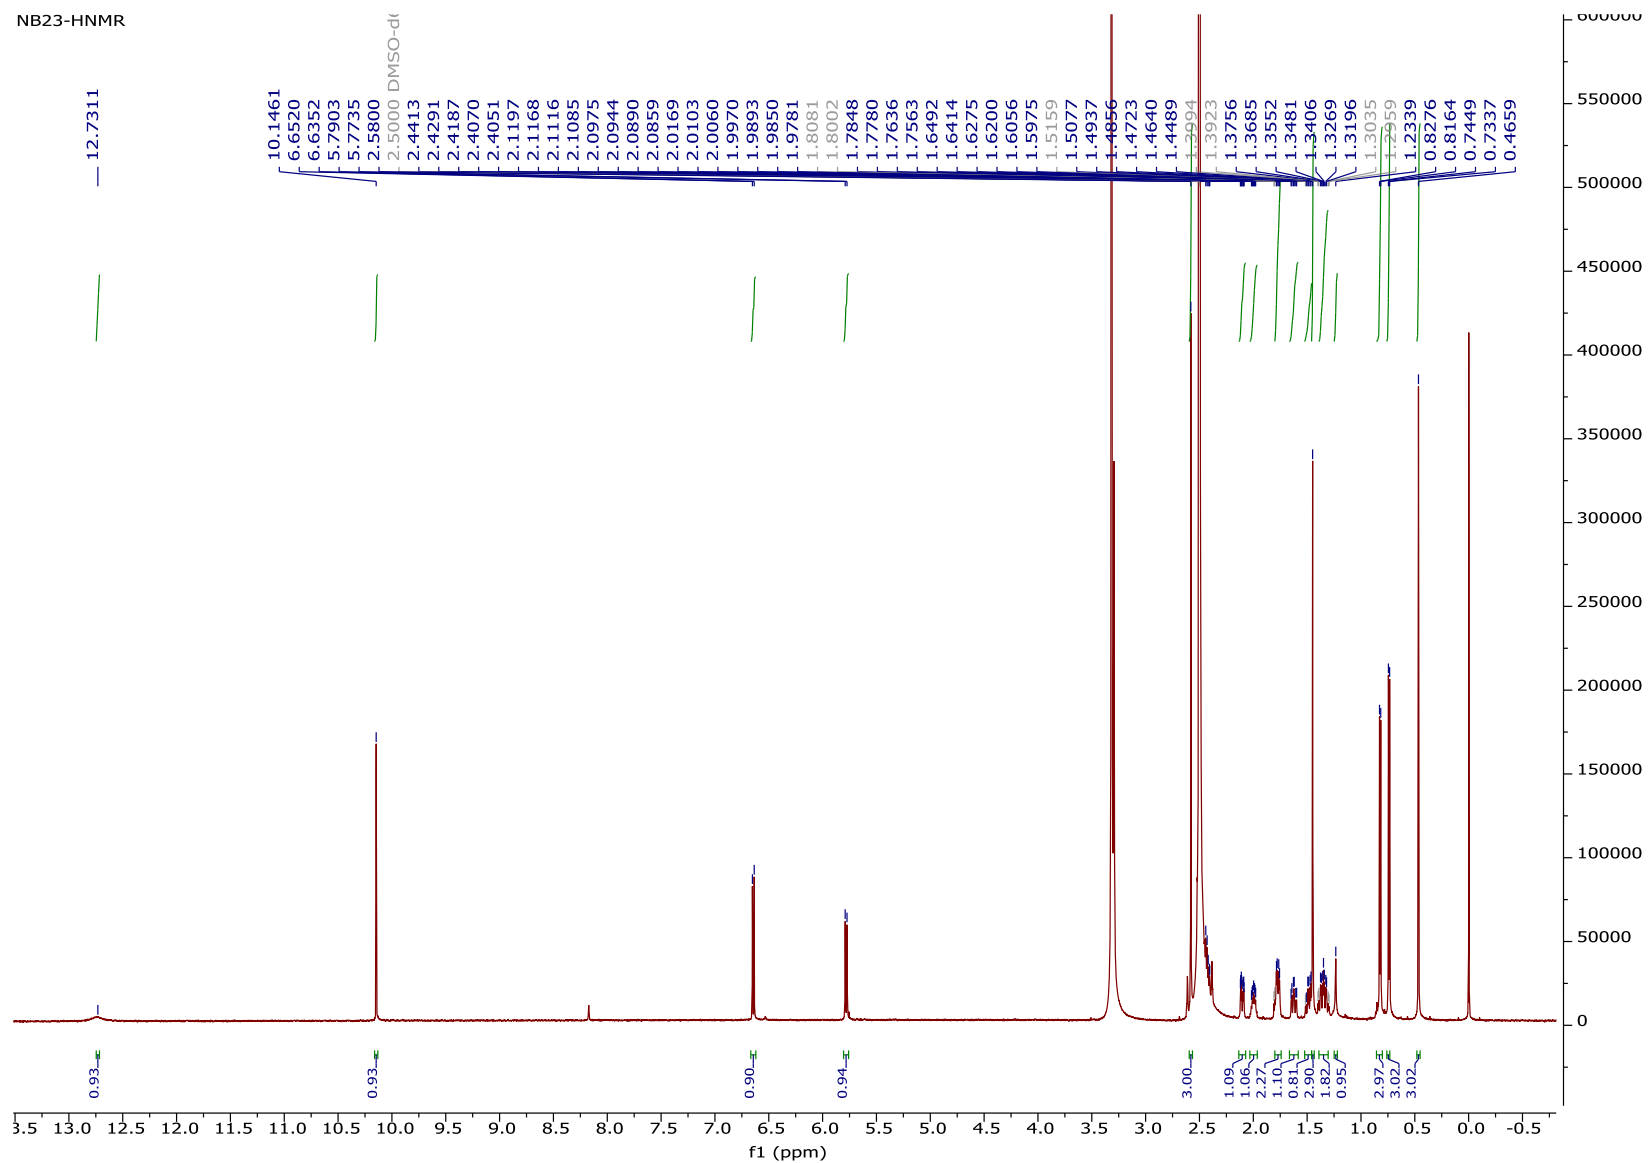

**Figure S15.**  $^1\text{H}$  NMR Spectrum of **1** in DMSO.

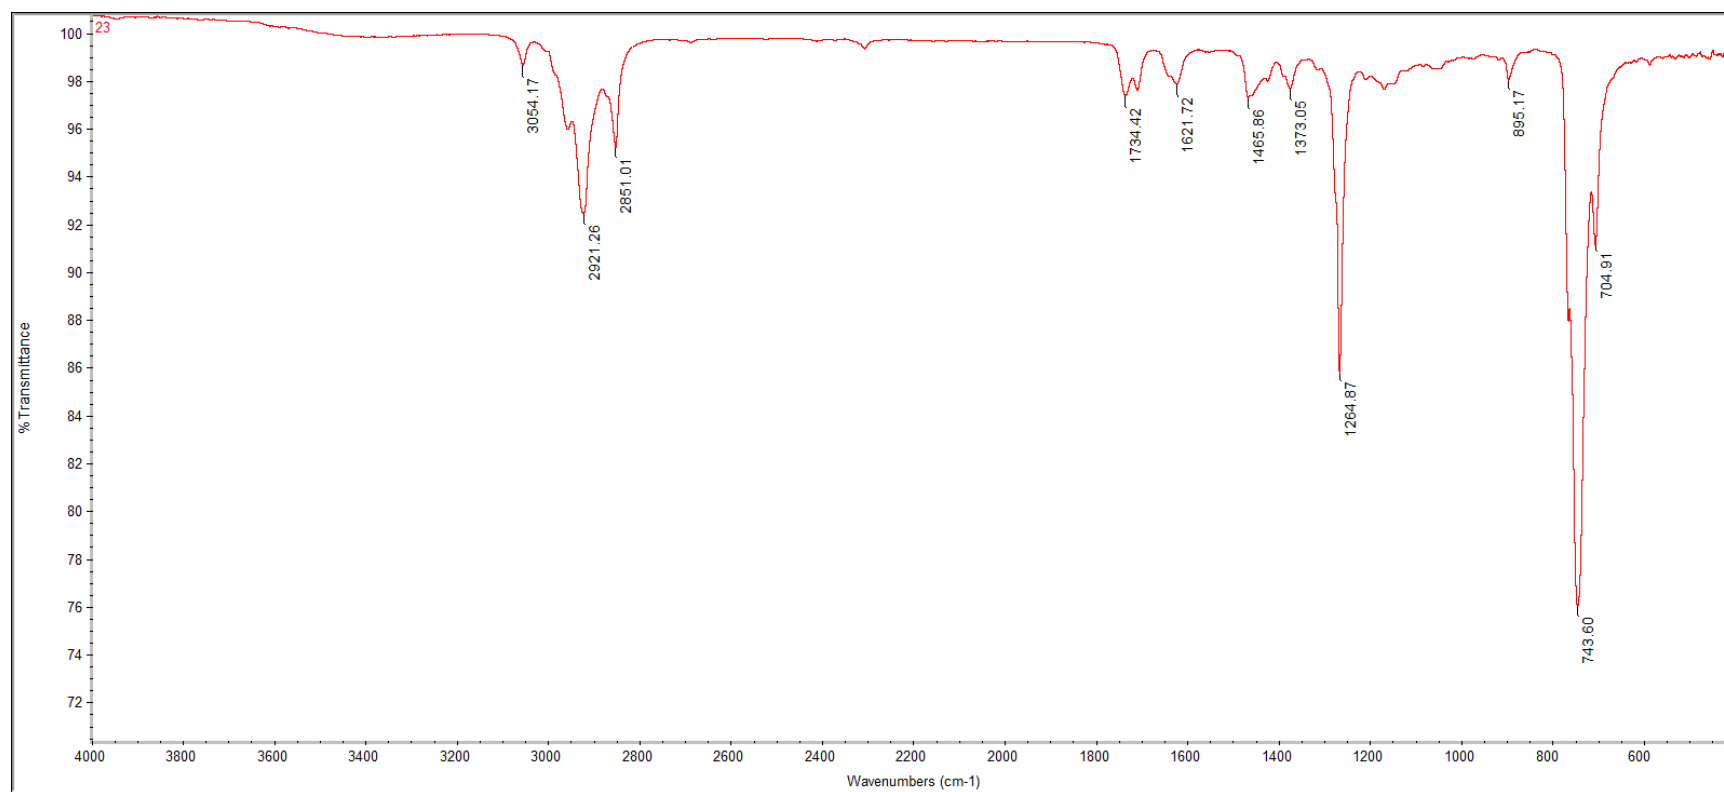

**Figure S16.** IR spectrum of compound **1**.

C-2 #1169 RT: 6.60 AV: 1 NL: 4.87E7  
T: FTMS + p ESI Full ms [200.0000-800.0000]

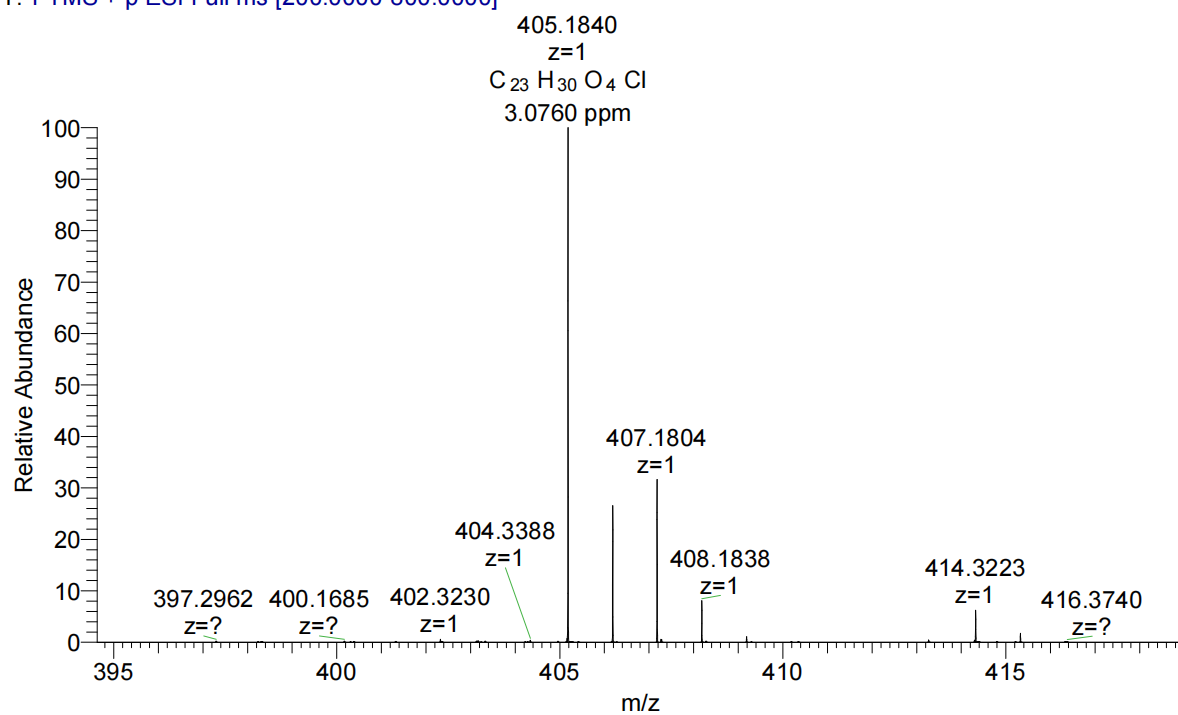

**Figure S17.** HR-ESIMS of compound **1**.

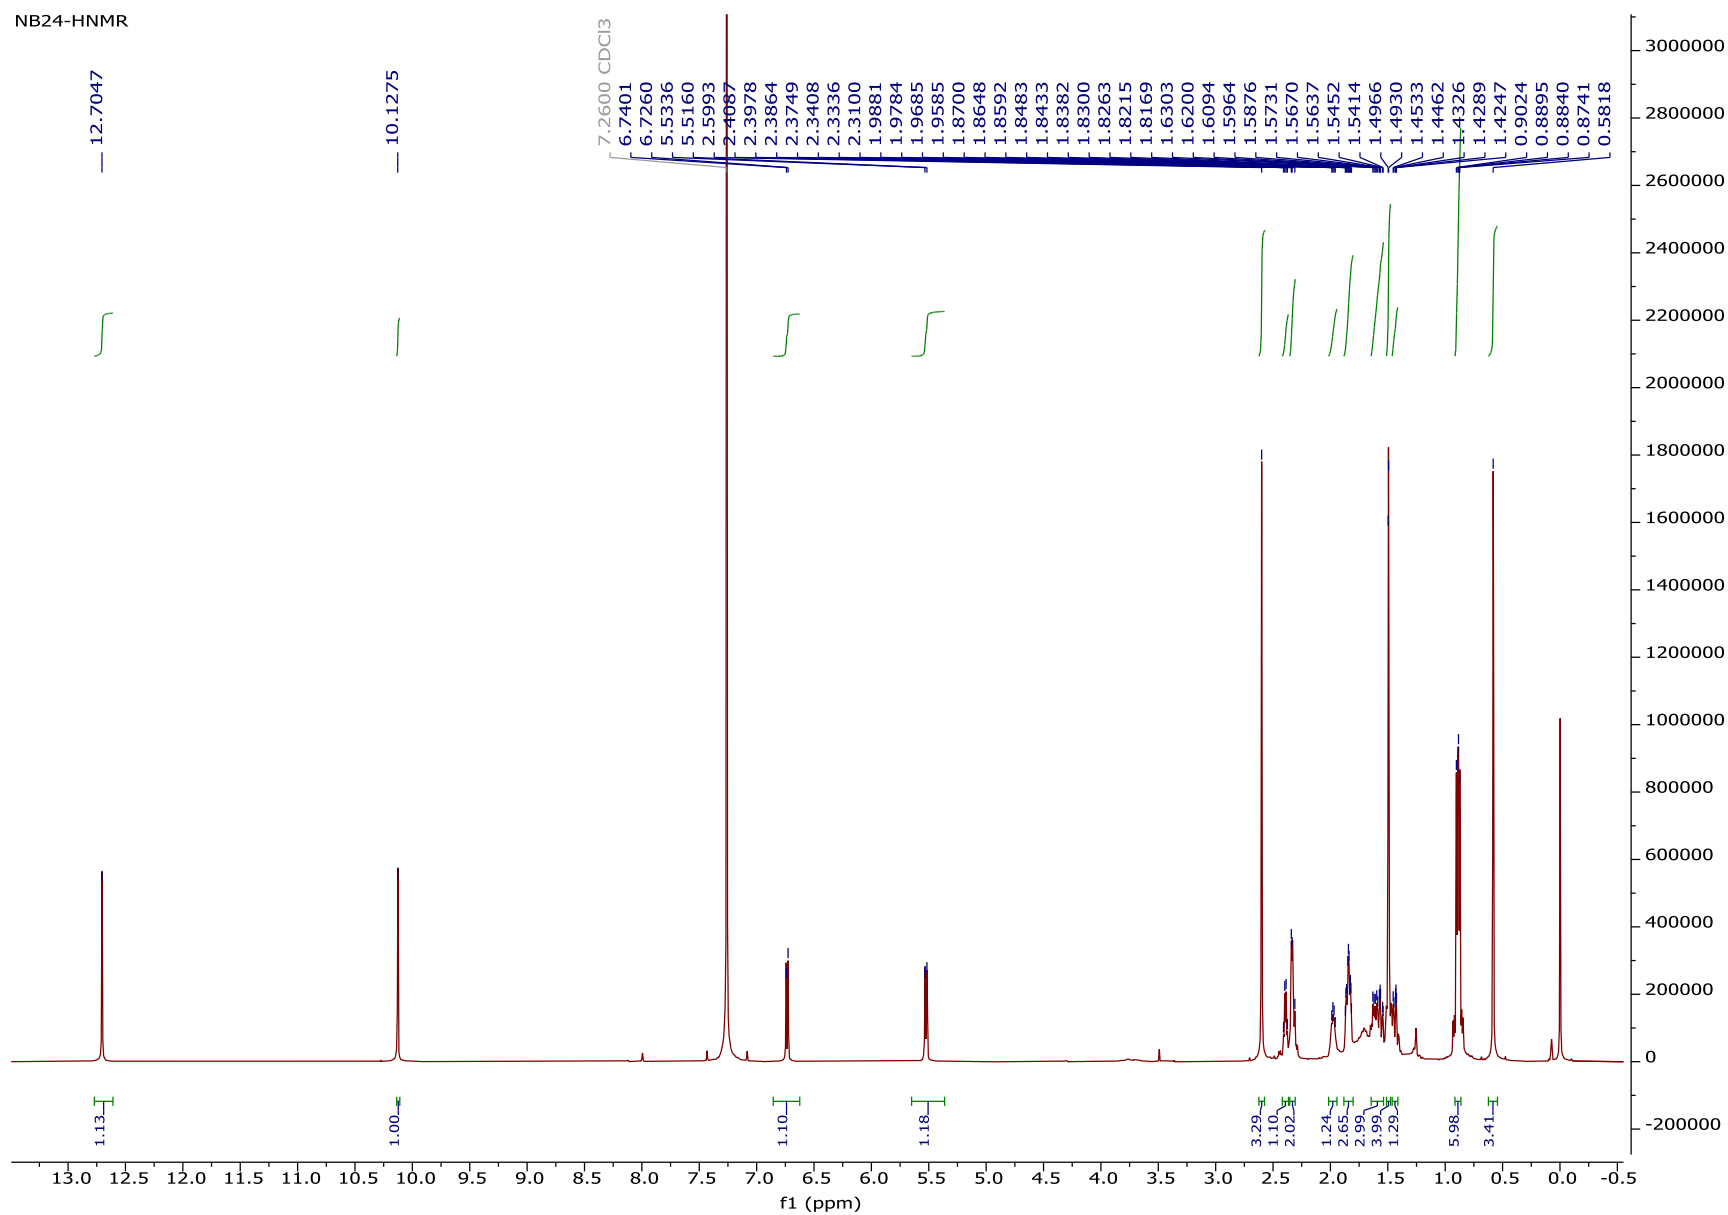

**Figure S18.**  $^1\text{H}$  NMR Spectrum of **2** in  $\text{CDCl}_3$ .

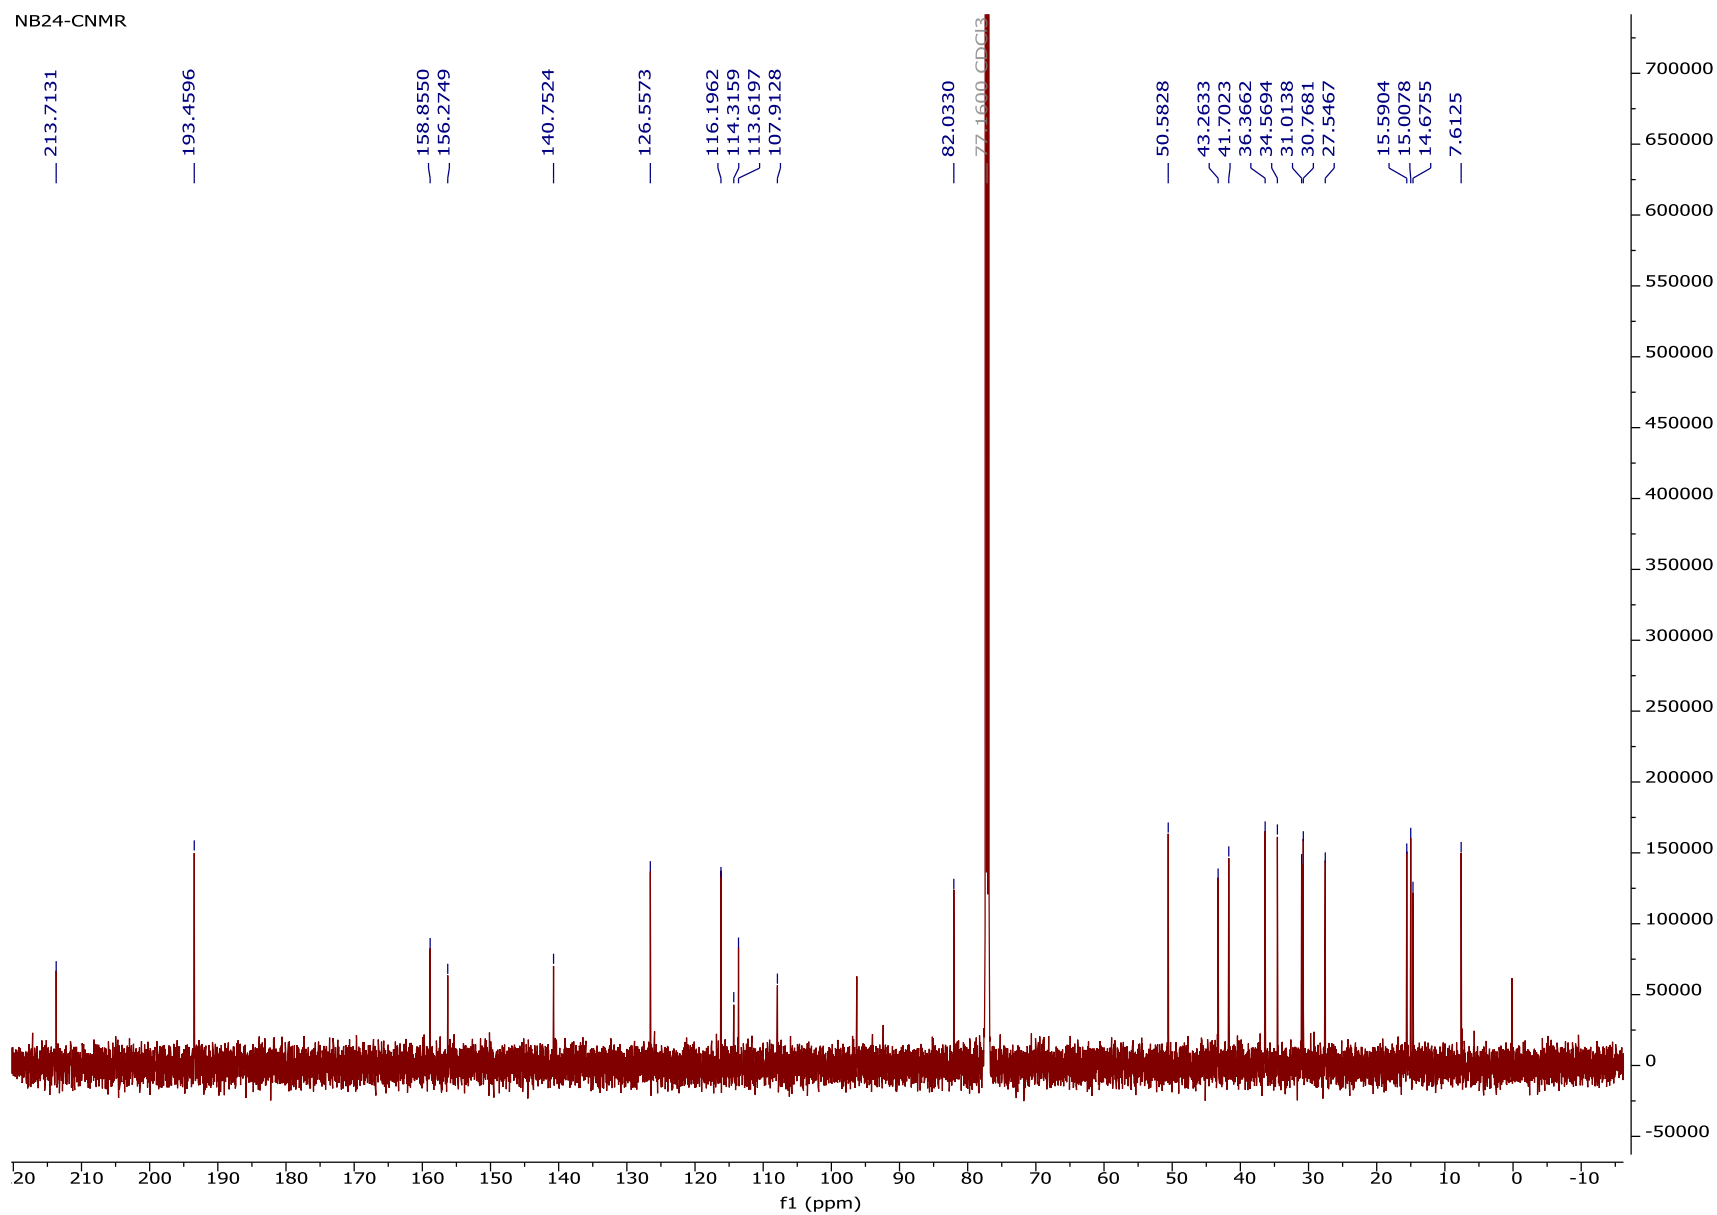

**Figure S19.**  $^{13}\text{C}$  NMR Spectrum of **2** in  $\text{CDCl}_3$ .

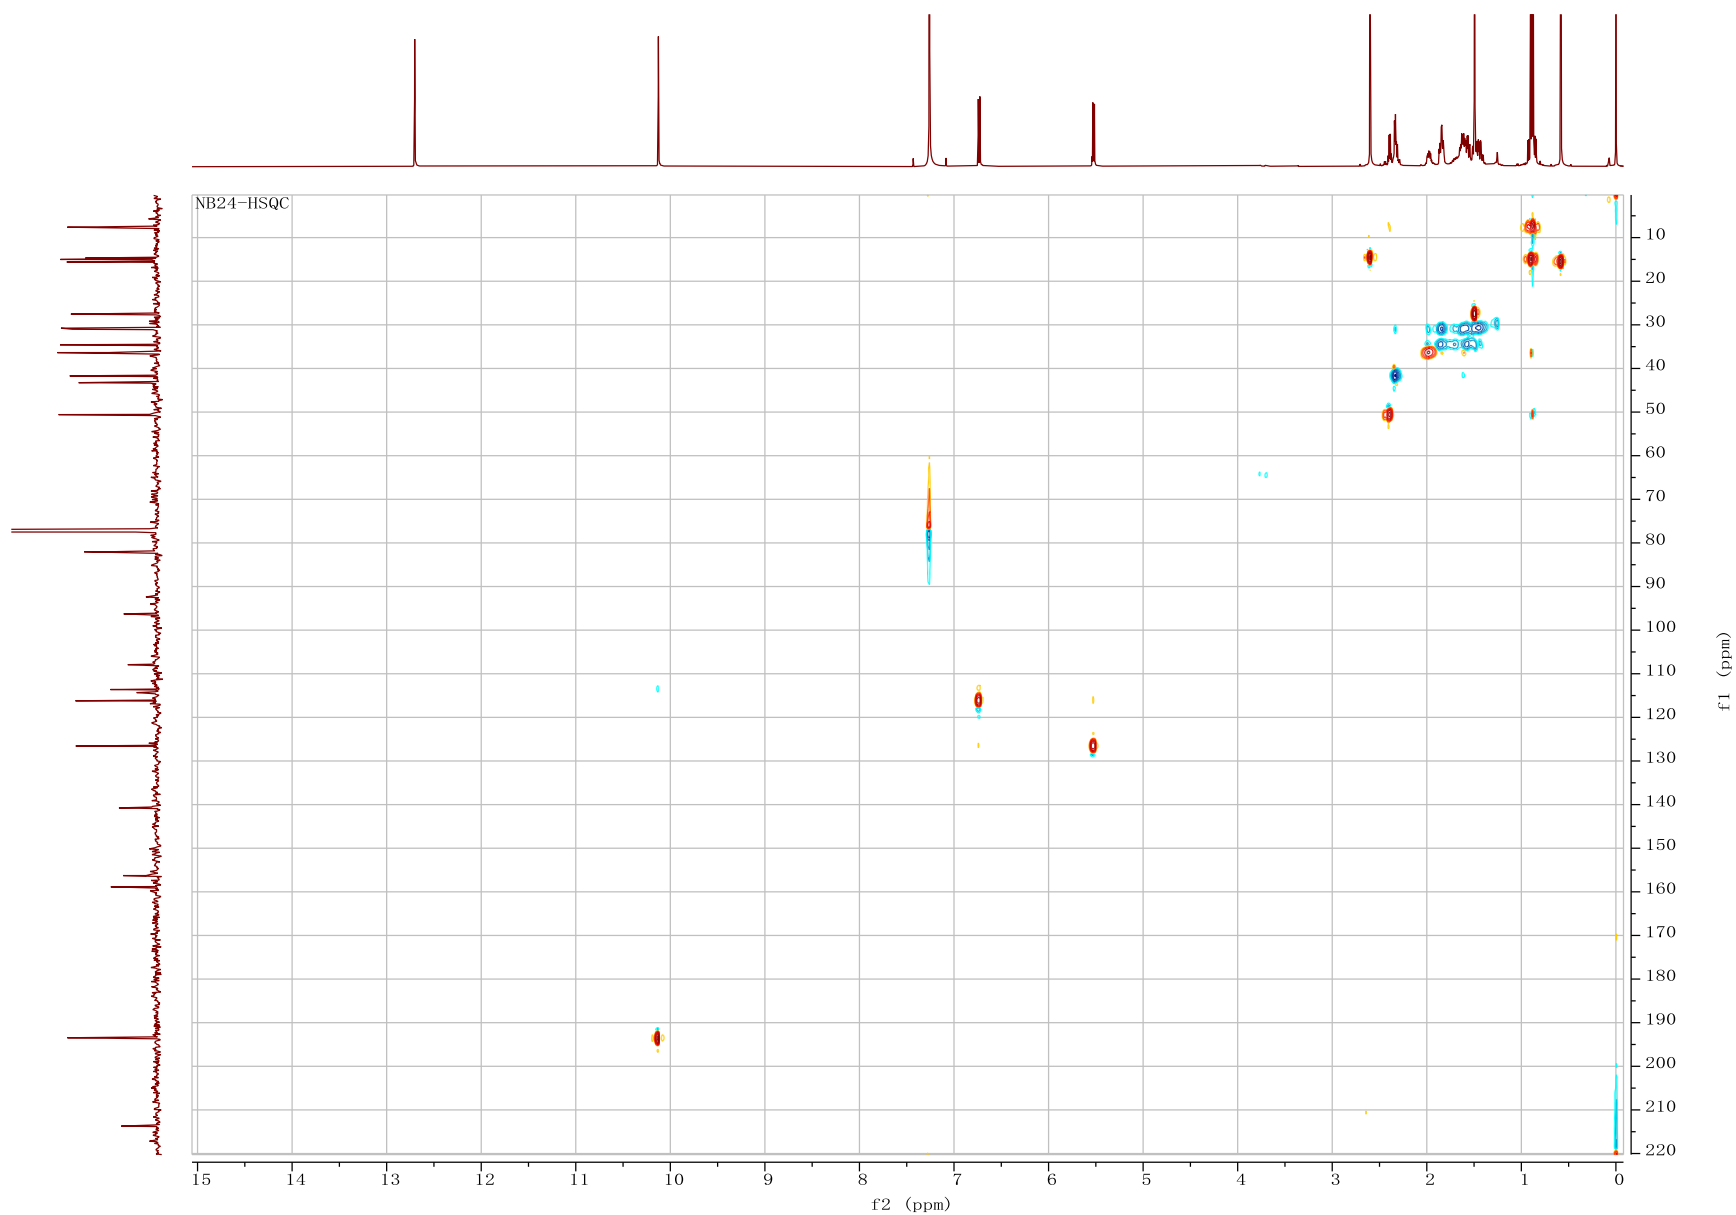

**Figure S20.** HSQC Spectrum of **2** in  $\text{CDCl}_3$ .

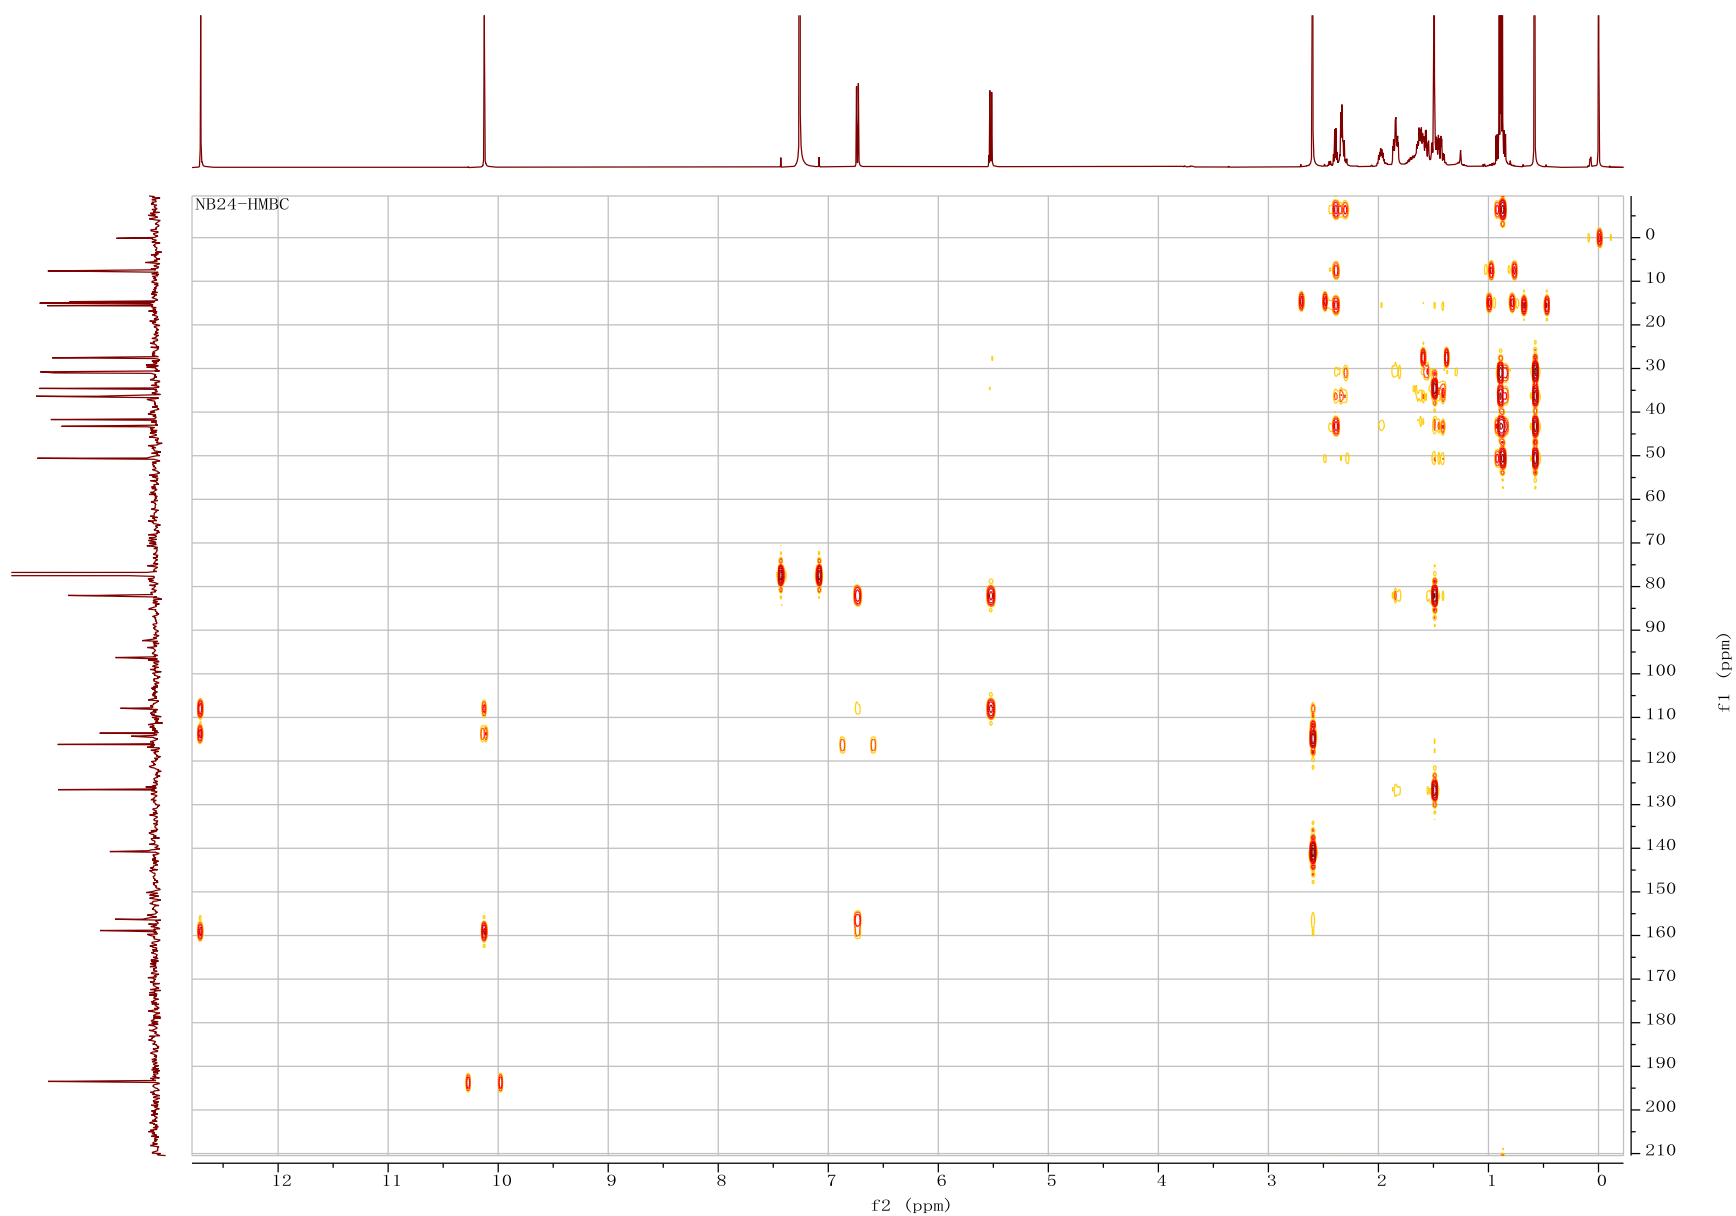

**Figure S21.** HMBC Spectrum of **2** in  $\text{CDCl}_3$ .

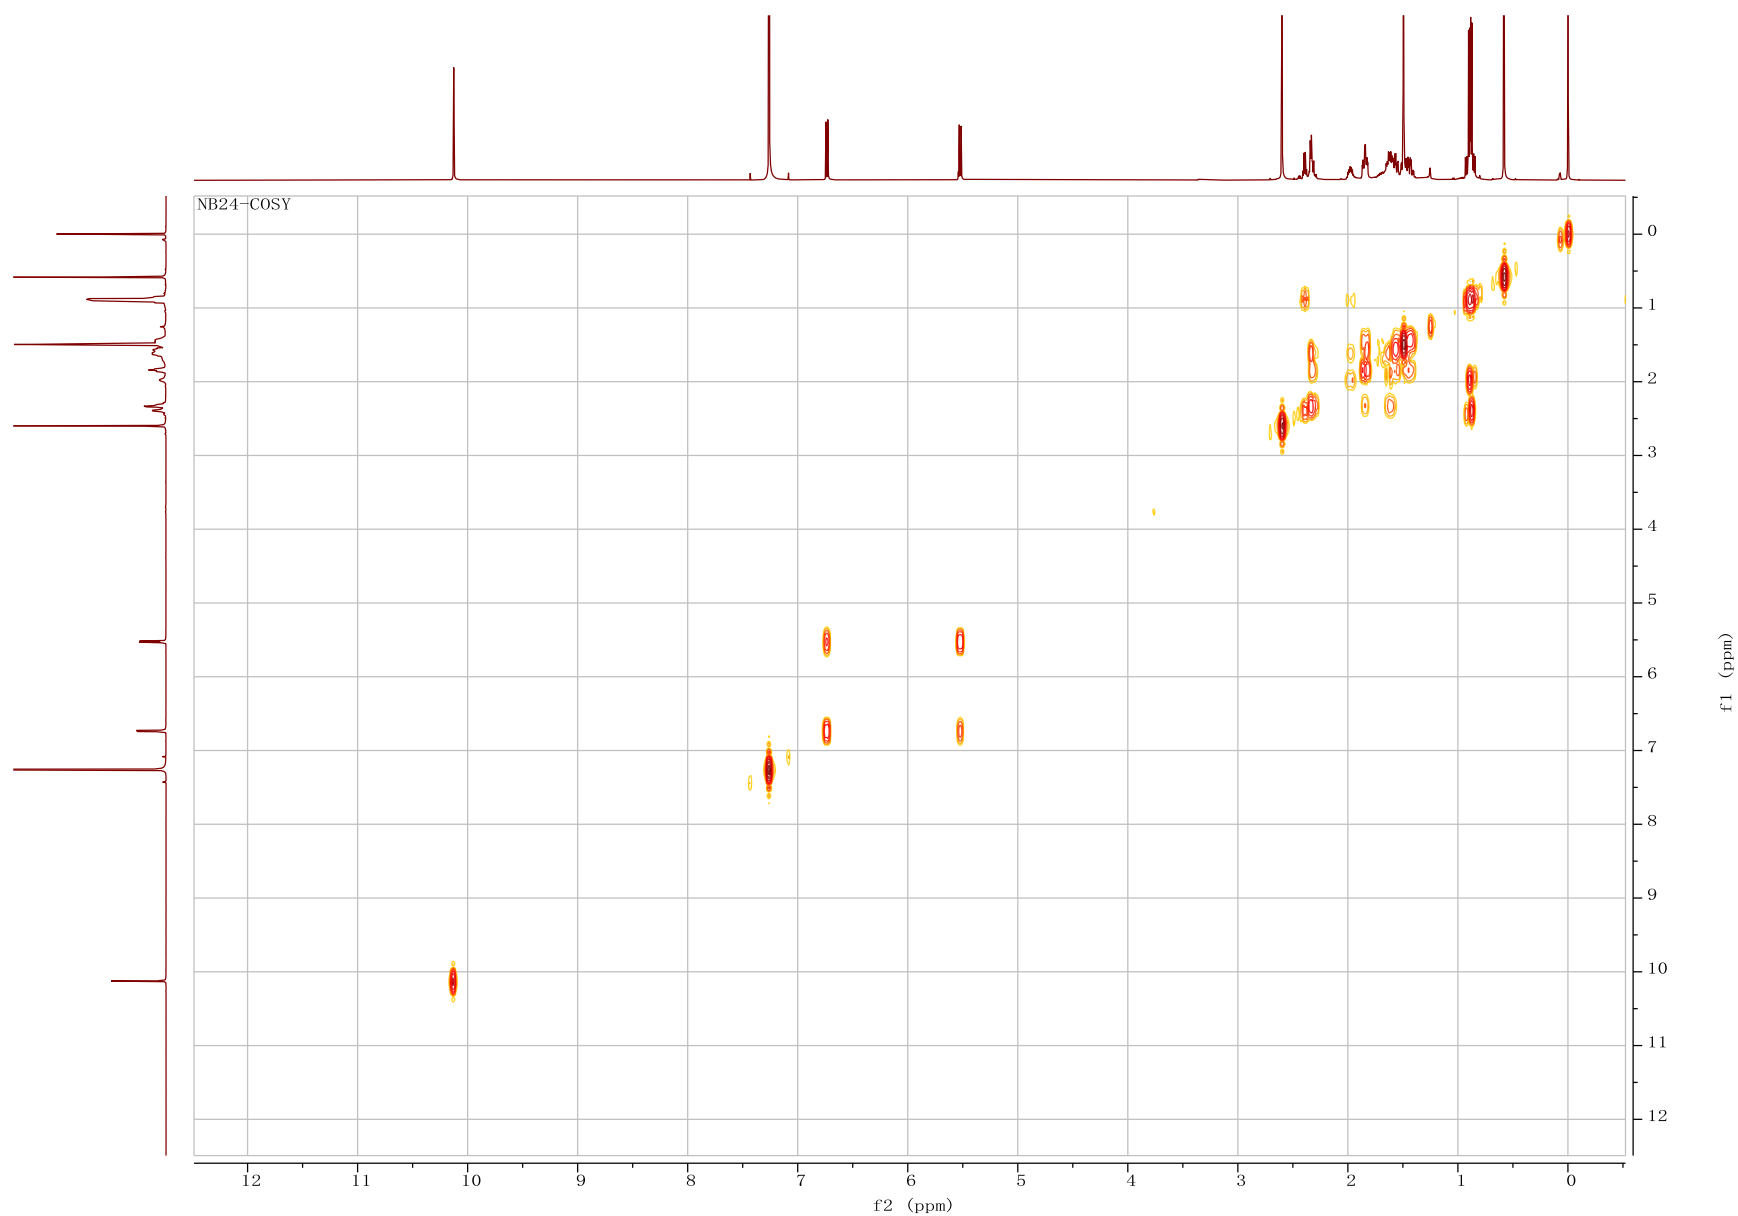

**Figure S22.** COSY Spectrum of **2** in CDCl<sub>3</sub>.



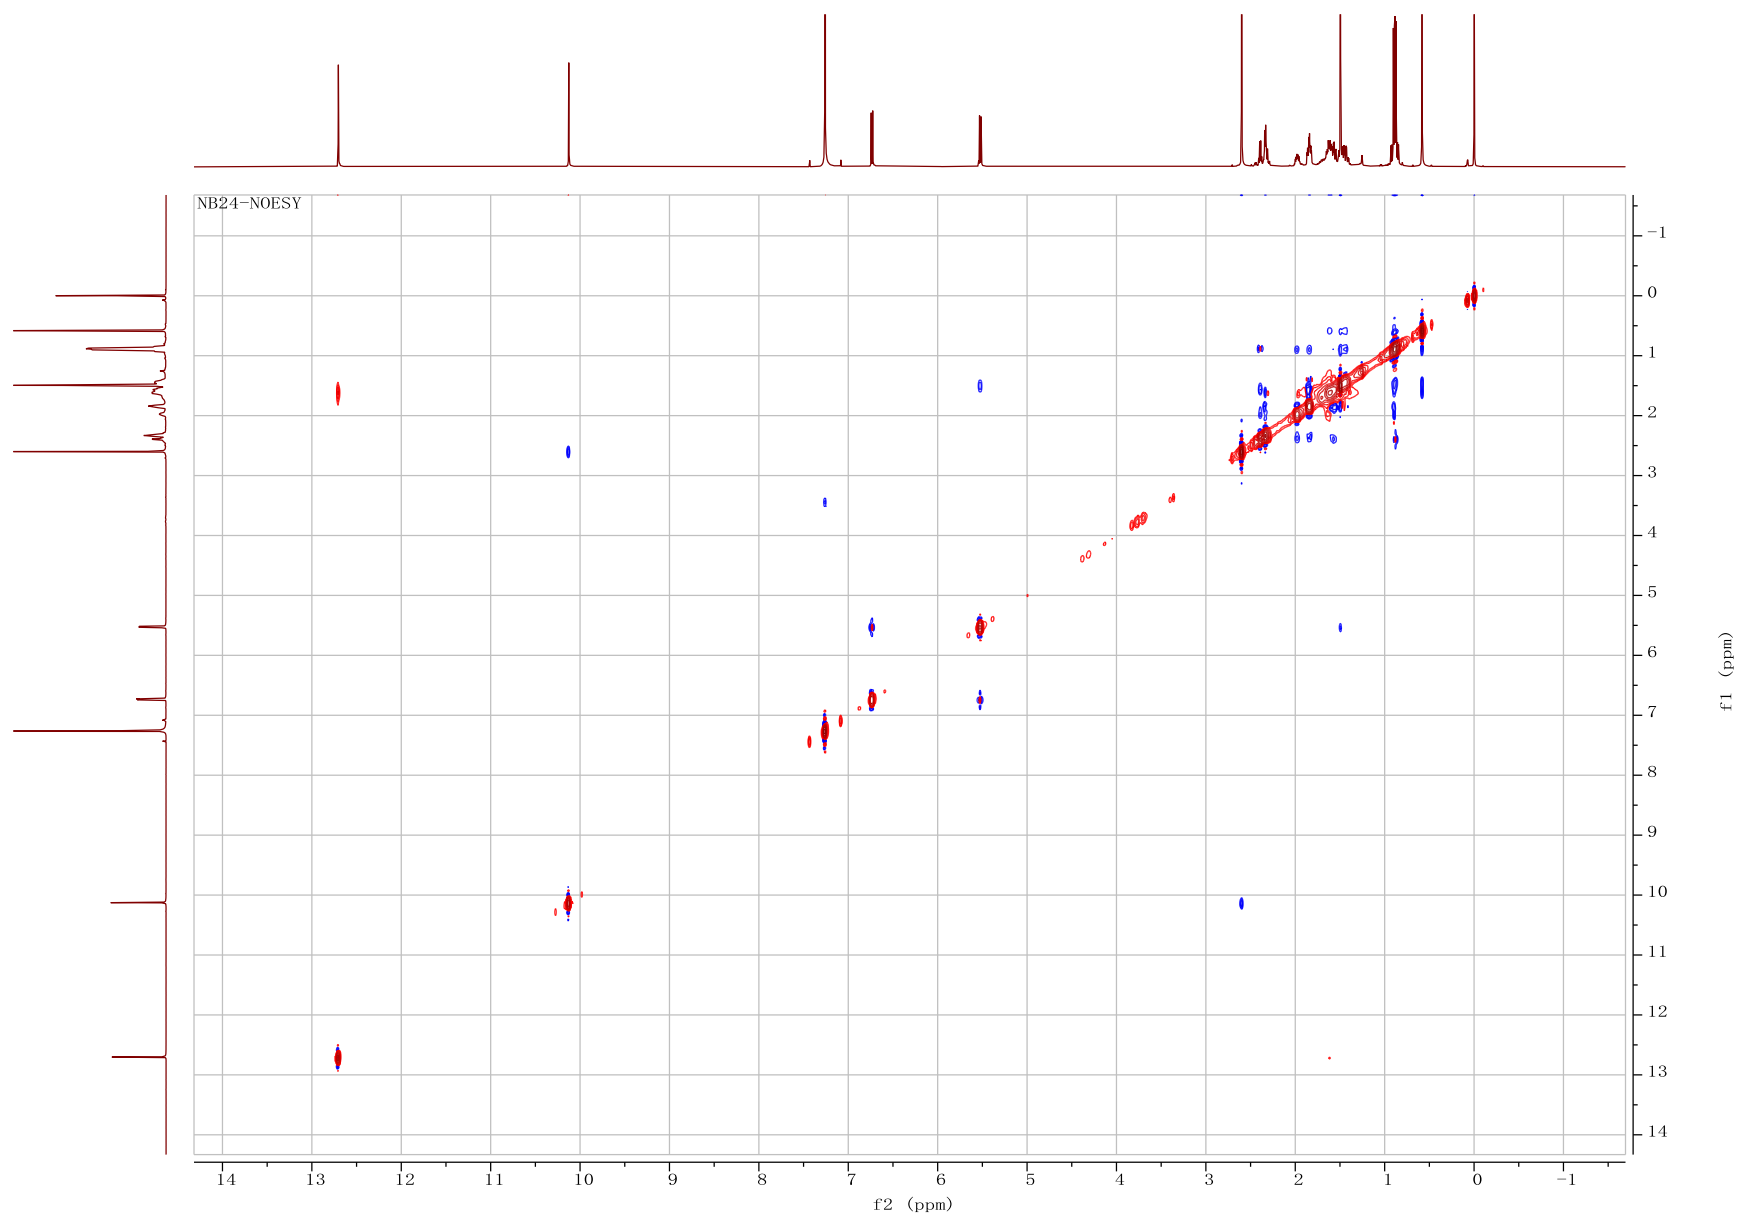

**Figure S23.** NOESY Spectrum of **2** in CDCl<sub>3</sub>.

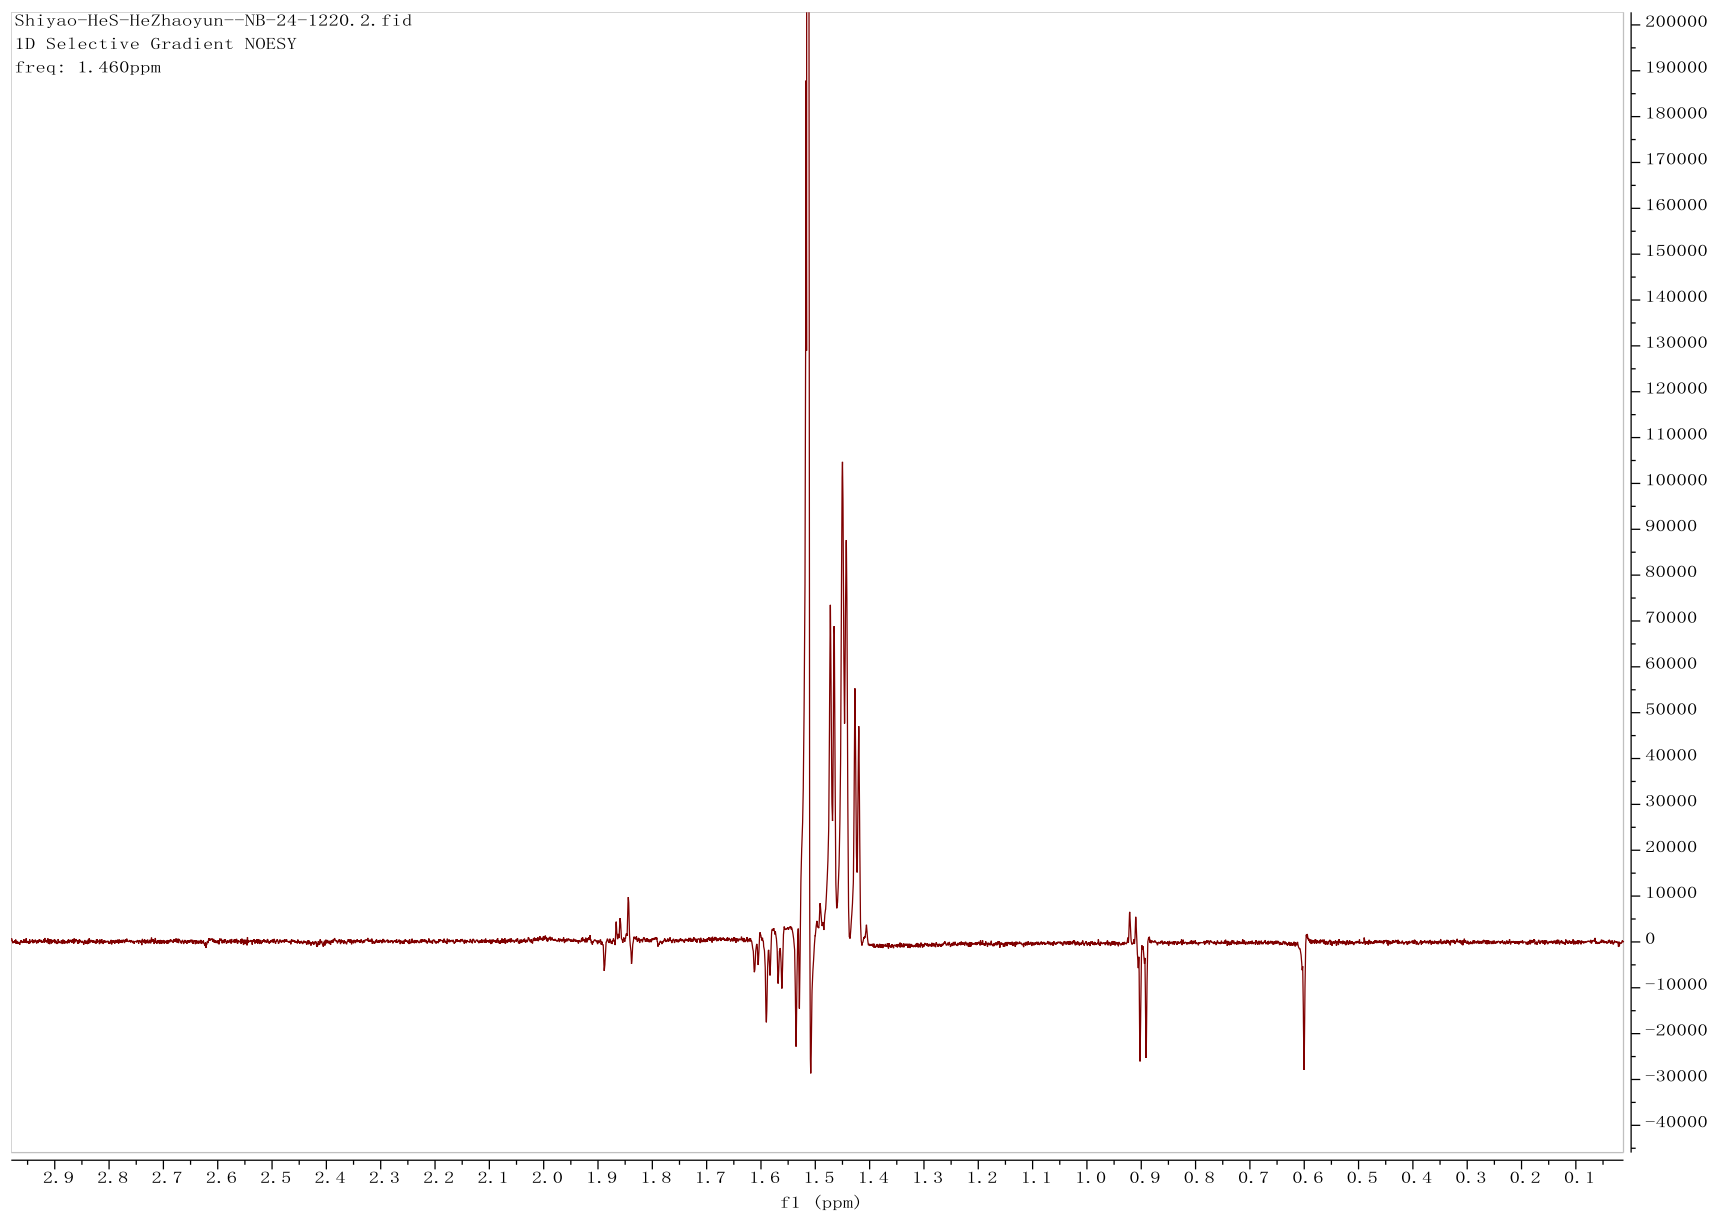

**Figure S24.** 1D NOE Spectrum of **2** in  $\text{CDCl}_3$  ( $^1\text{H}$ -13,  $\delta_{\text{H}} = 1.44$  ppm)

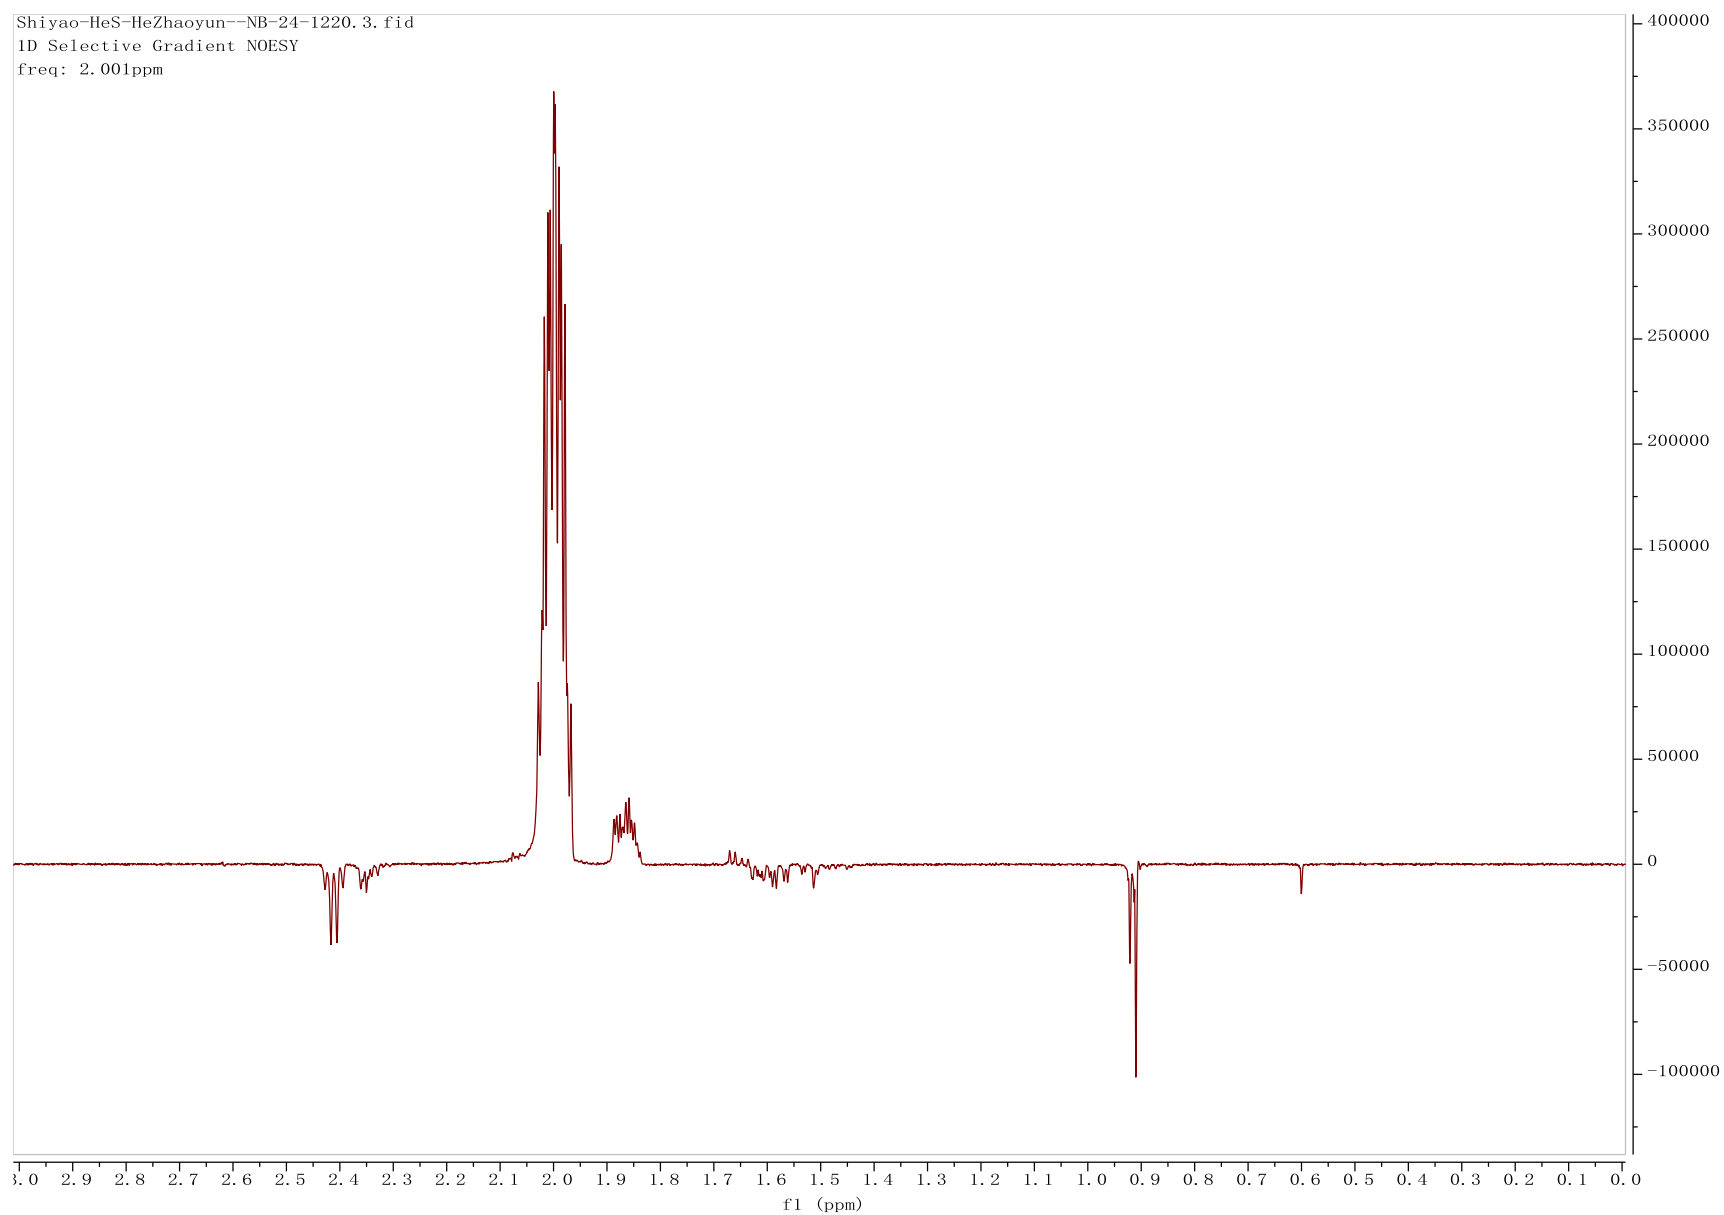

**Figure S25.** 1D NOE Spectrum of **2** in  $\text{CDCl}_3$  ( $\text{H-15}$ ,  $\delta_{\text{H}} = 1.97$  ppm)

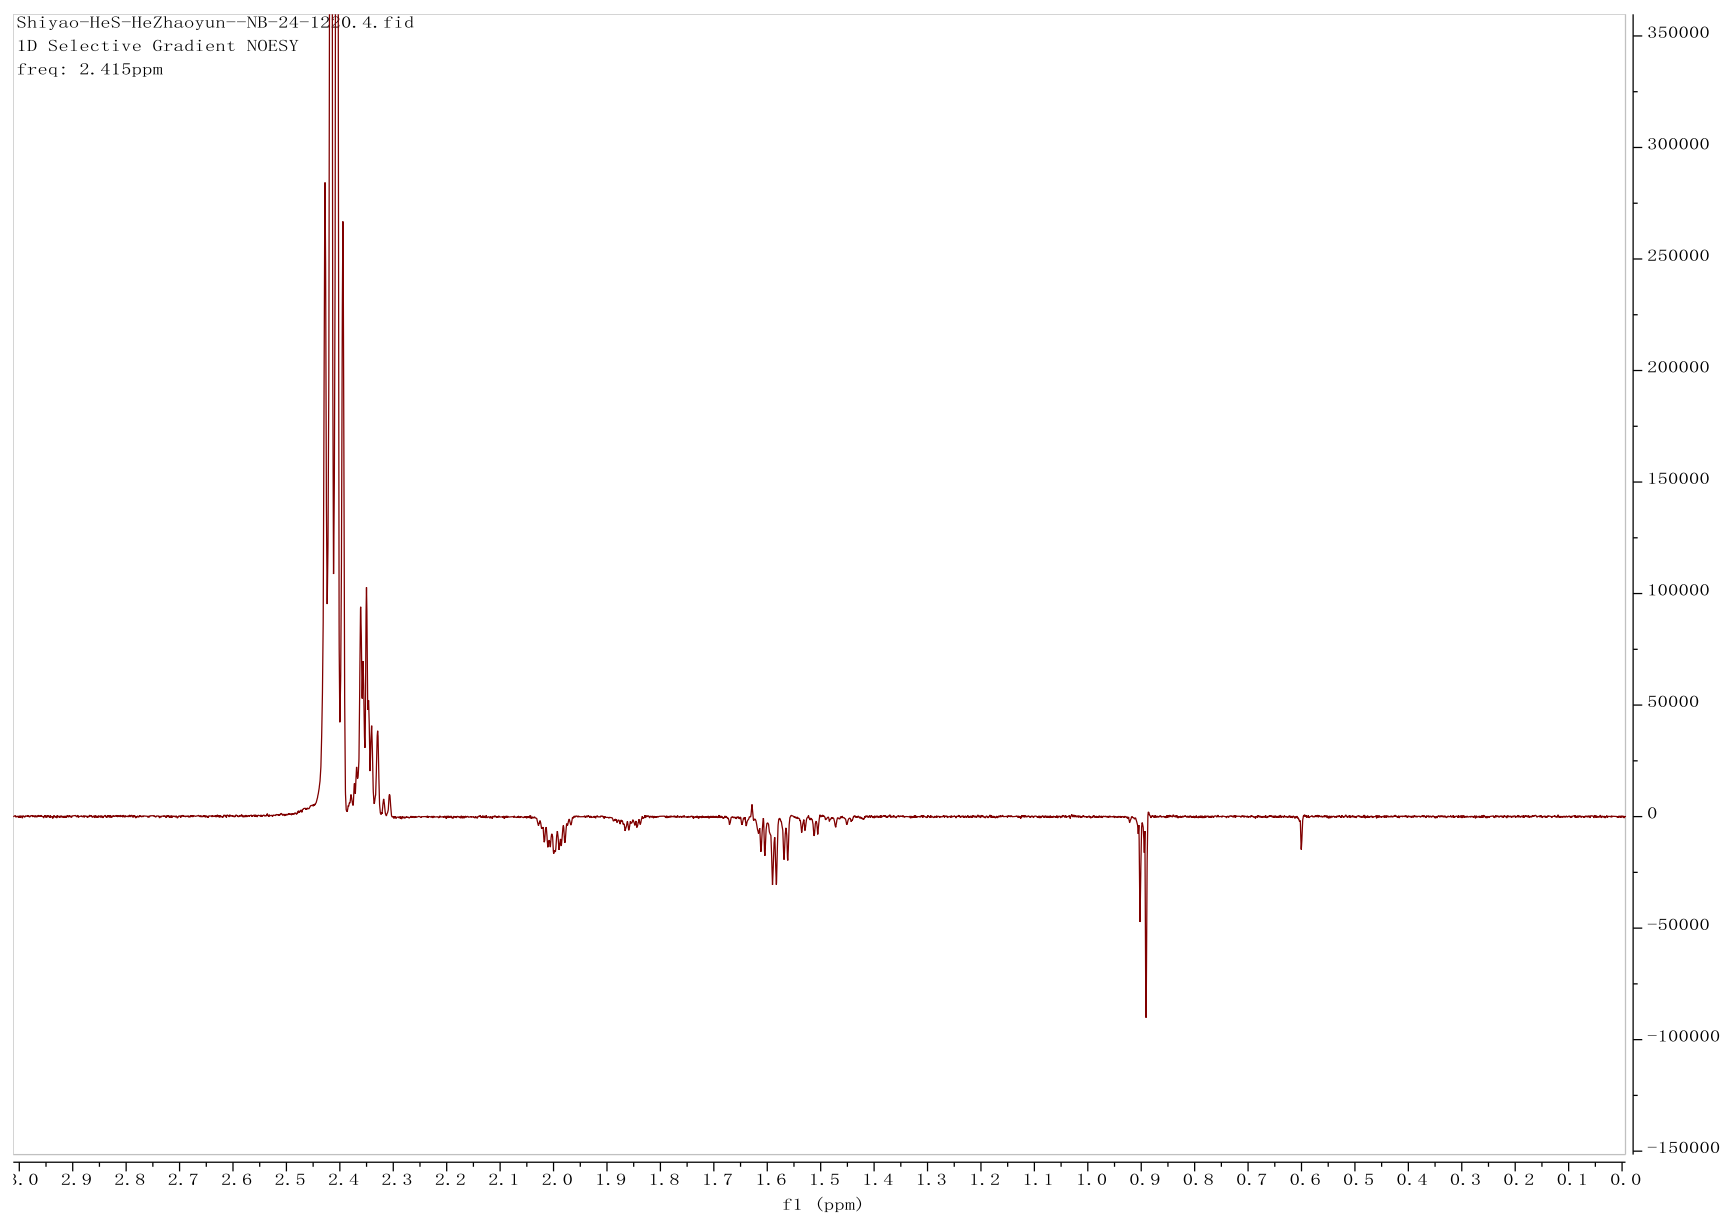

**Figure S26.** 1D NOE Spectrum of **2** in  $\text{CDCl}_3$  (H-19,  $\delta\text{H} = 2.40$  ppm)

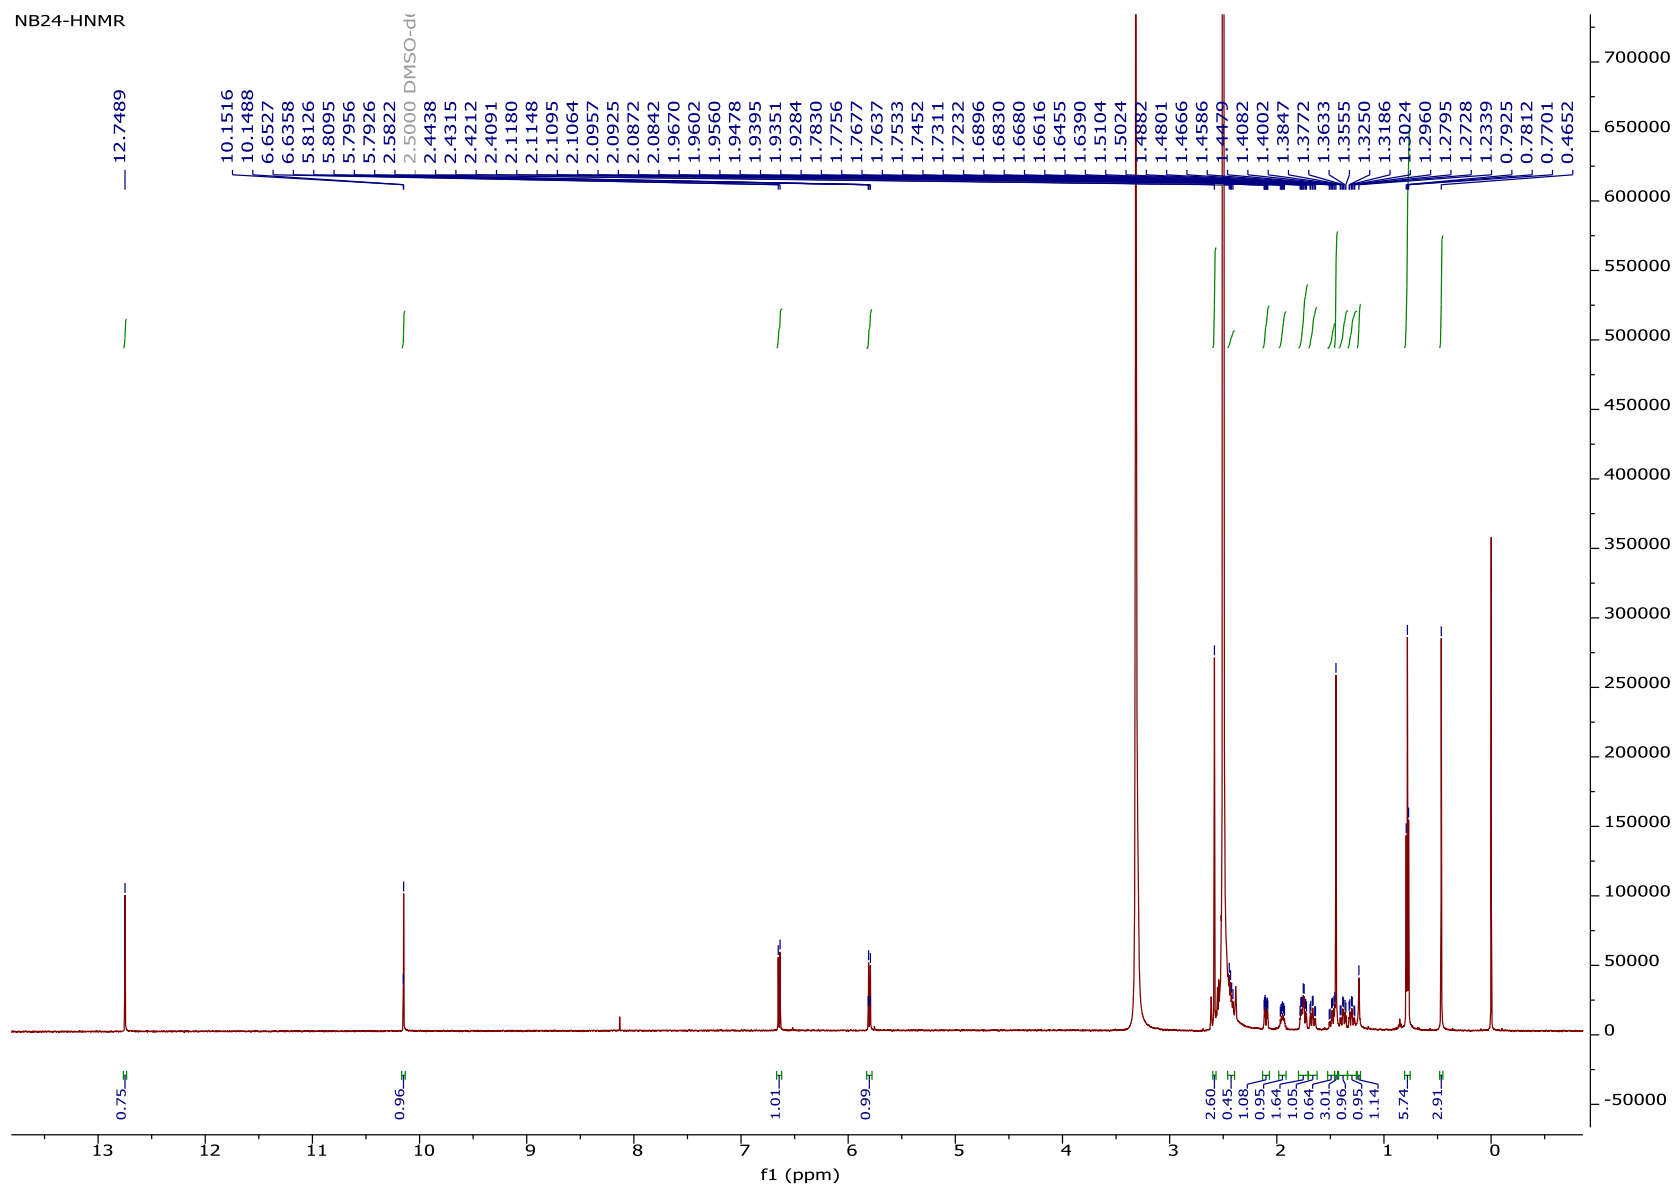

**Figure S27.**  $^1\text{H}$  NMR Spectrum of **2** in DMSO.

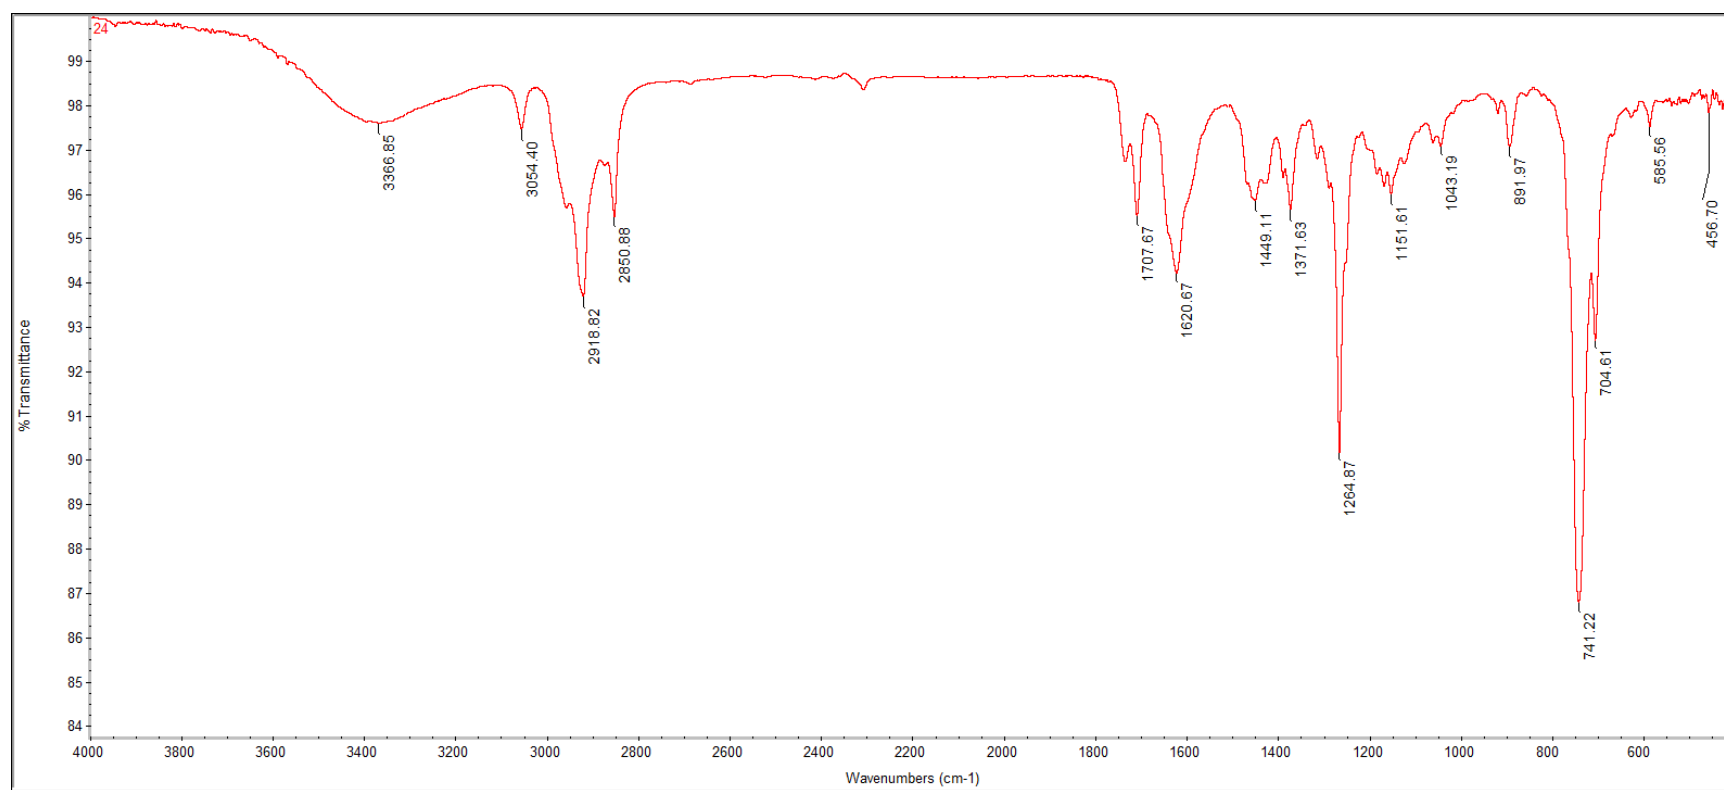

**Figure S28.** IR spectrum of compound **2**.

C-3 #1168 RT: 6.60 AV: 1 NL: 4.91E7  
T: FTMS + p ESI Full ms [200.0000-800.0000]

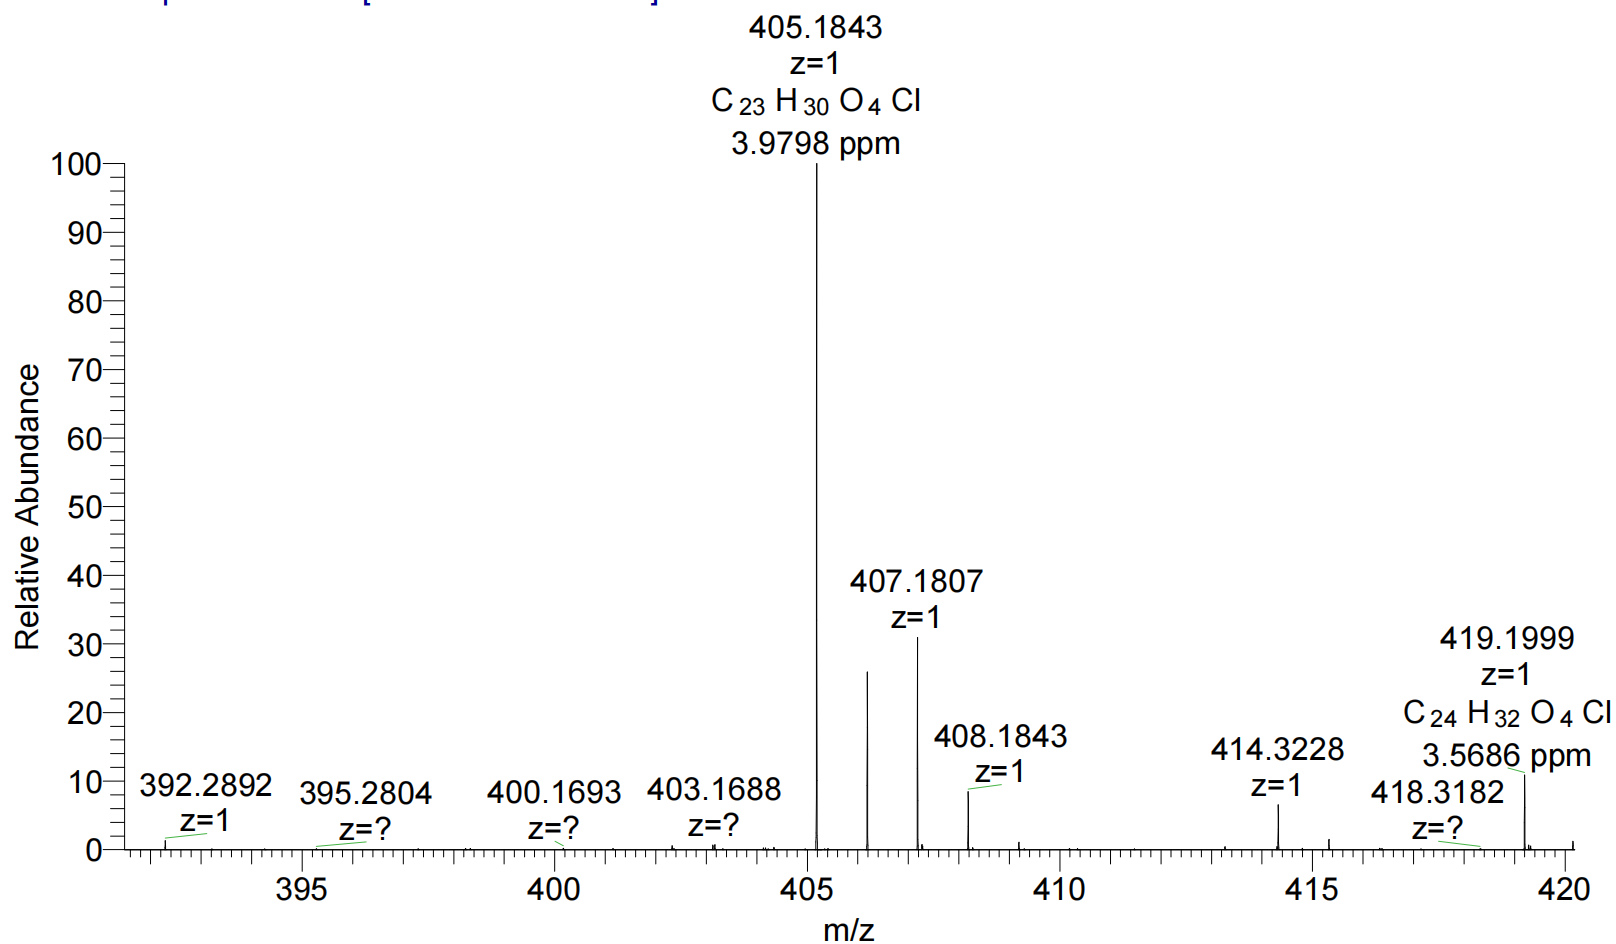

Figure S29. HR-ESIMS of compound 2.

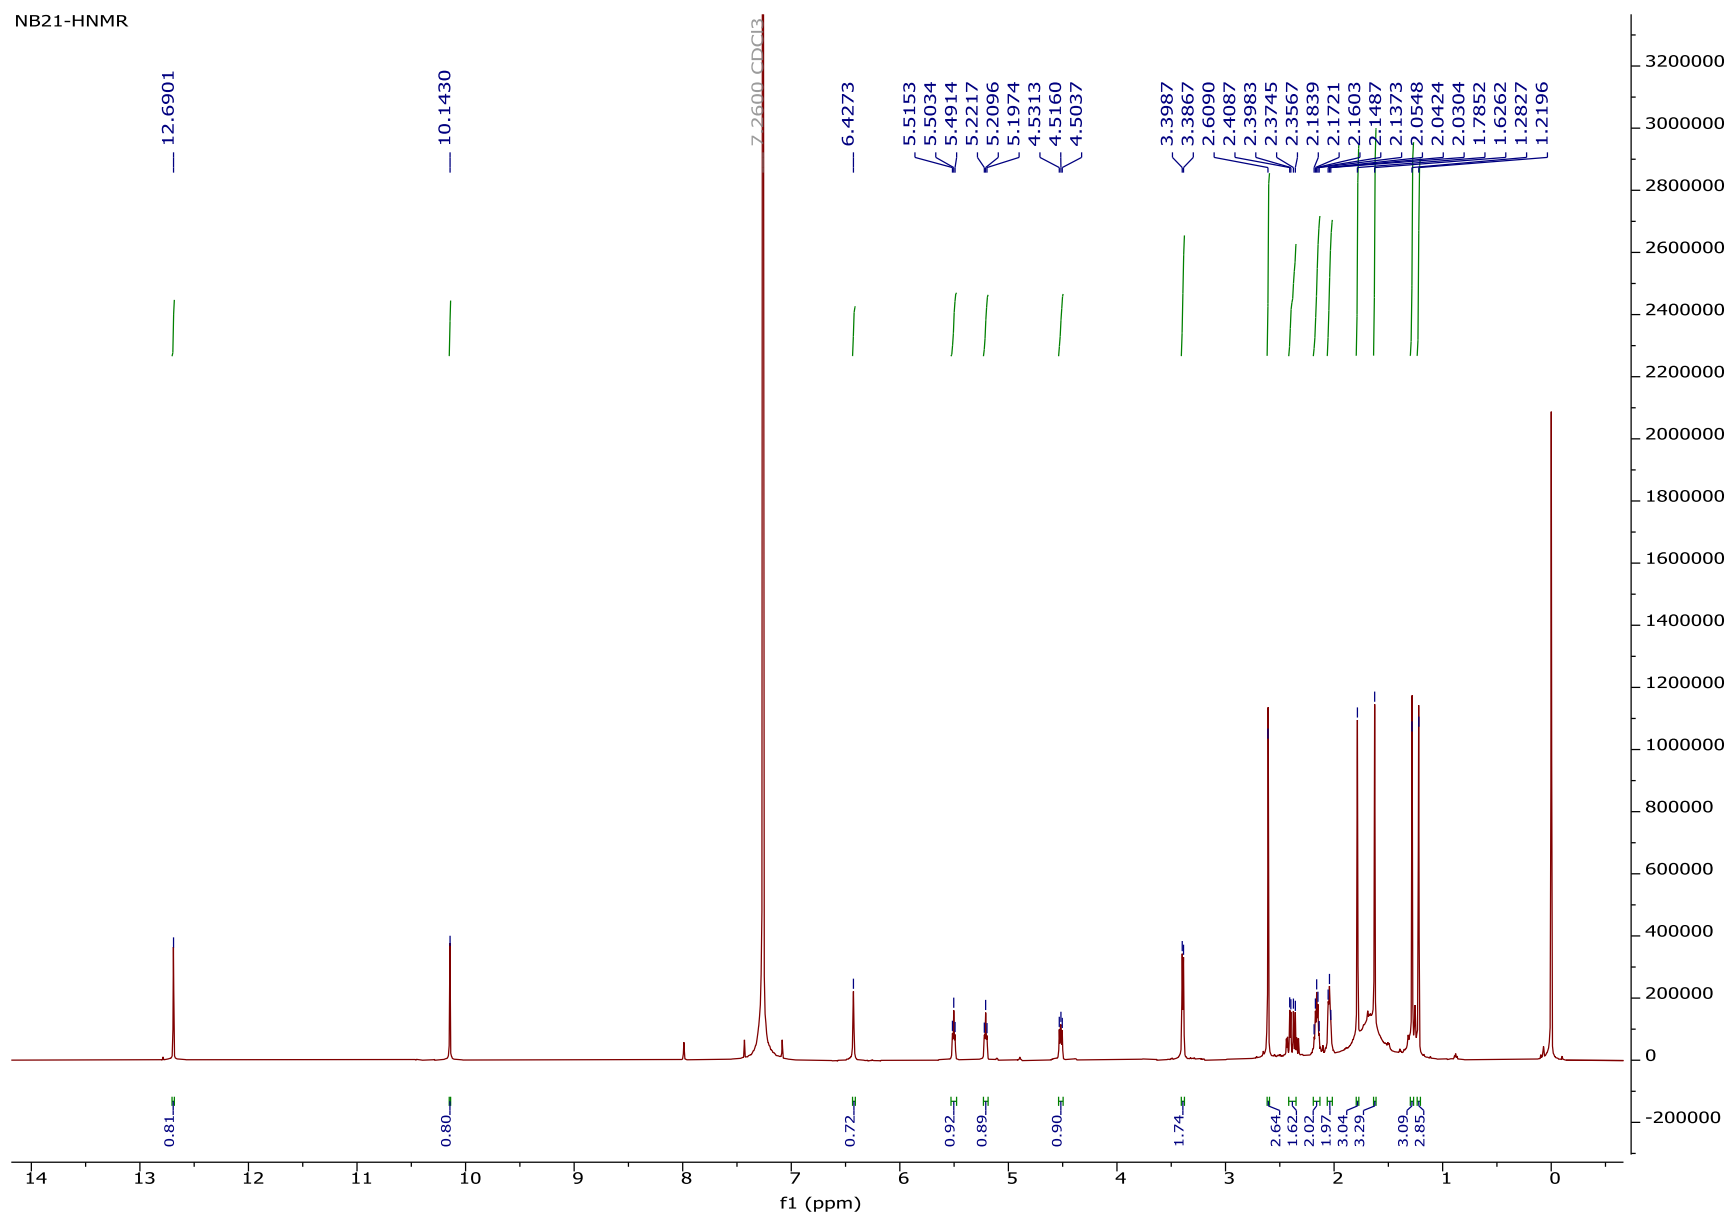

**Figure S30.** <sup>1</sup>H NMR Spectrum of **3** in CDCl<sub>3</sub>.



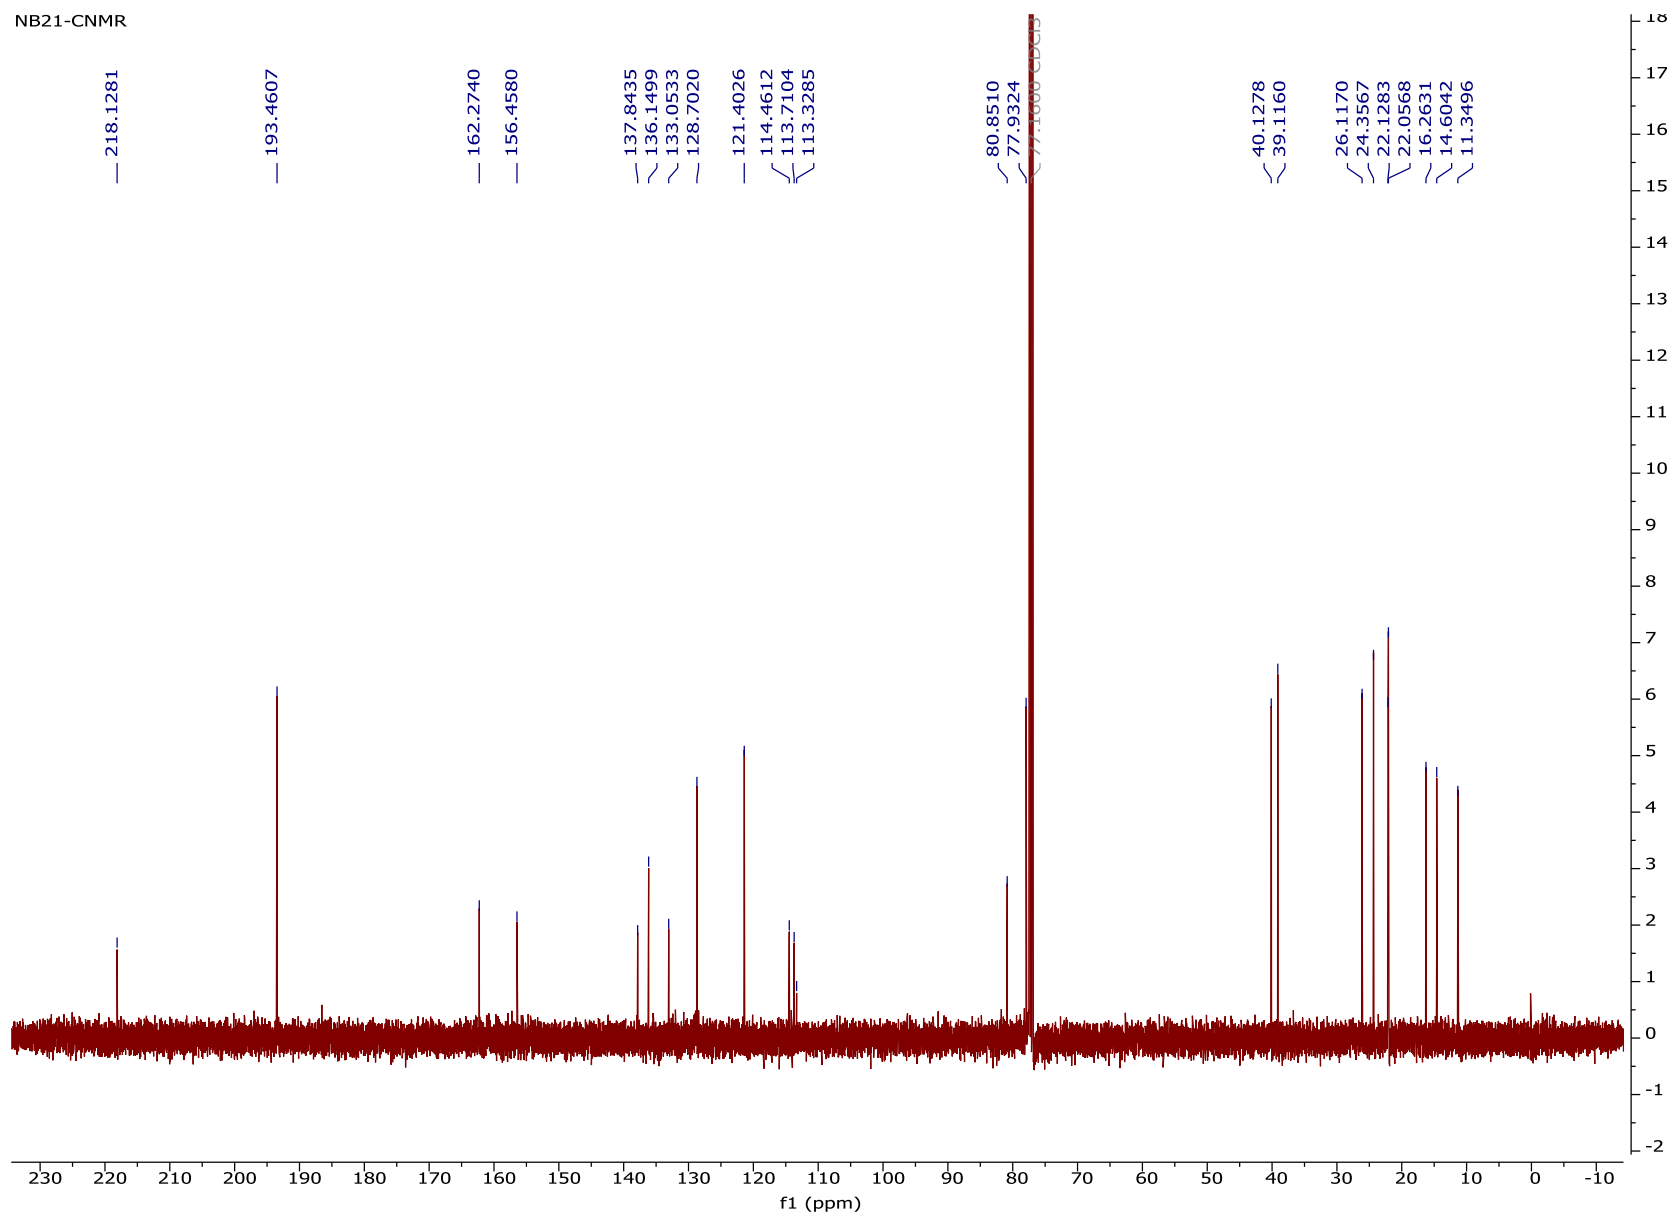

**Figure S31.**  $^{13}\text{C}$  NMR Spectrum of **3** in  $\text{CDCl}_3$ .

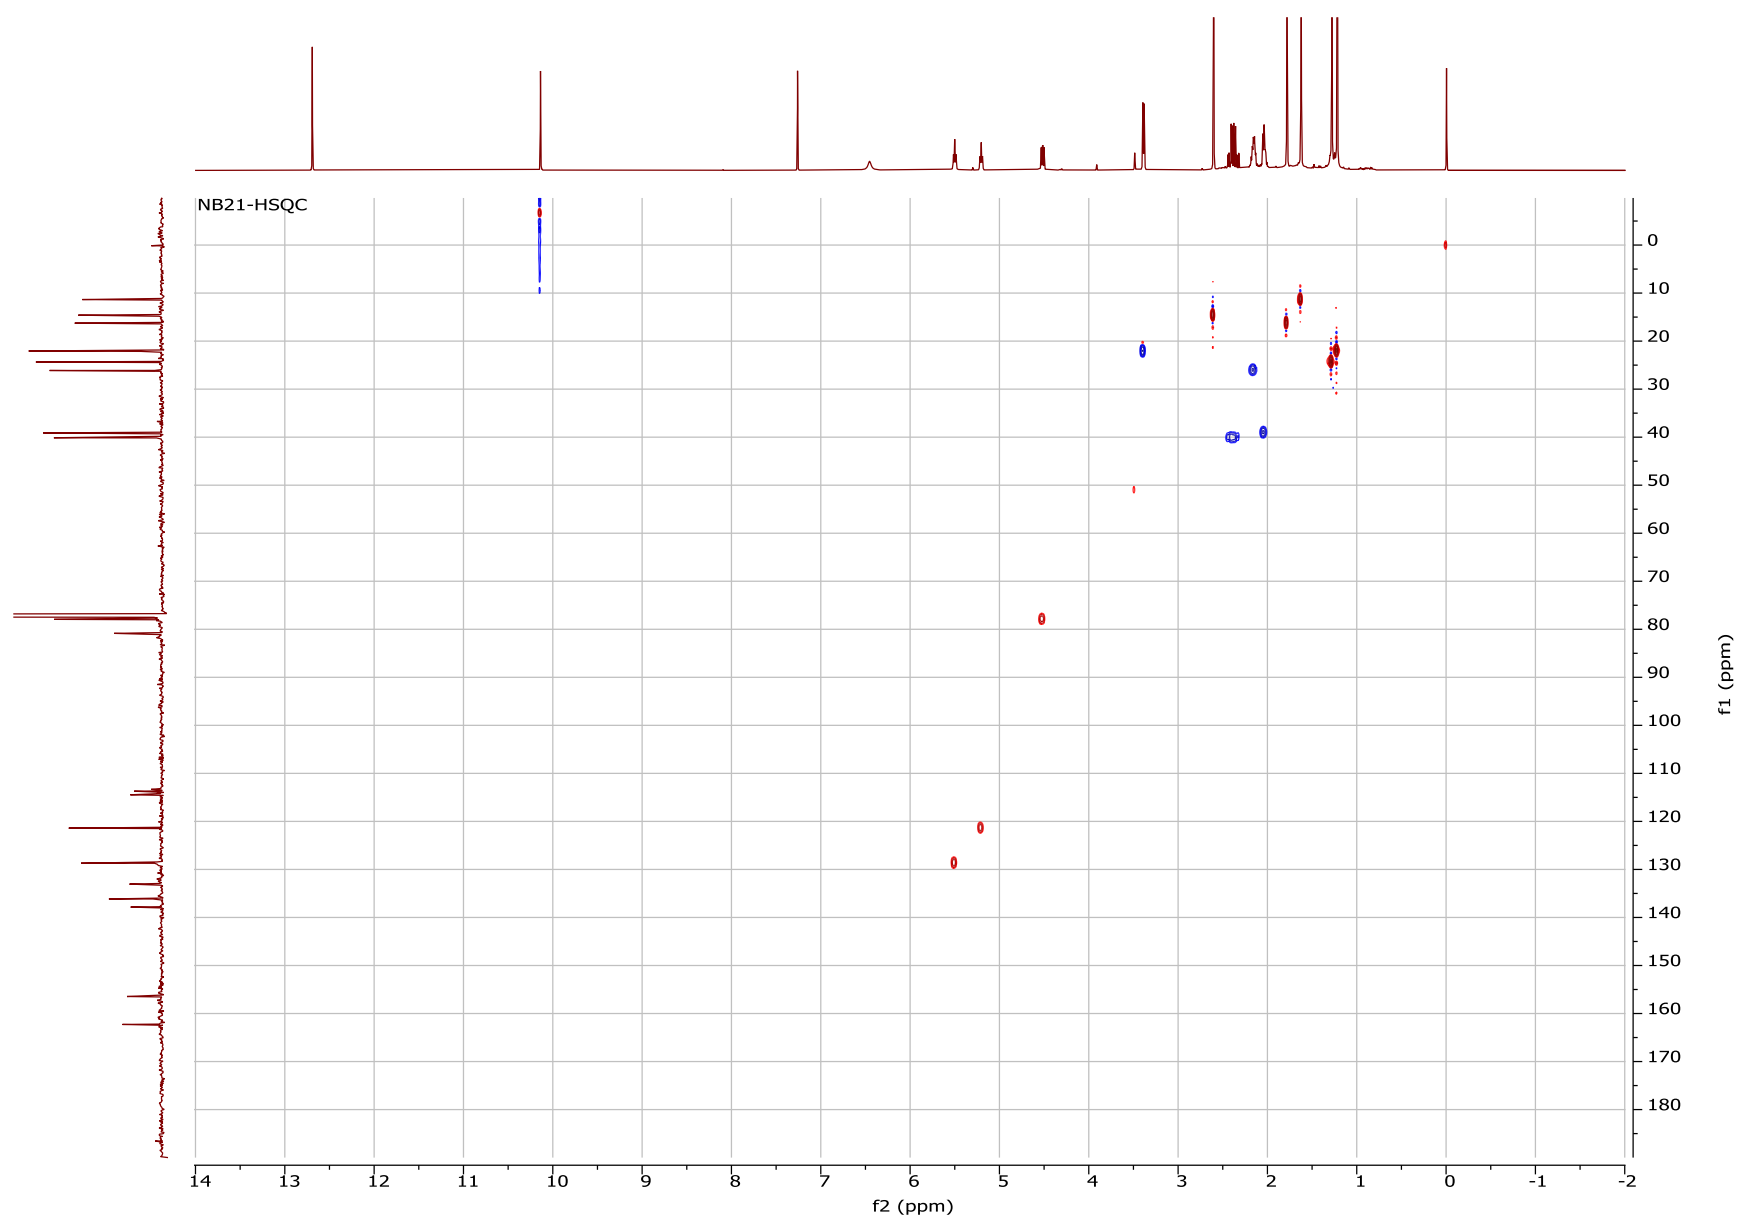

**Figure S32.** HSQC Spectrum of **3** in CDCl<sub>3</sub>.

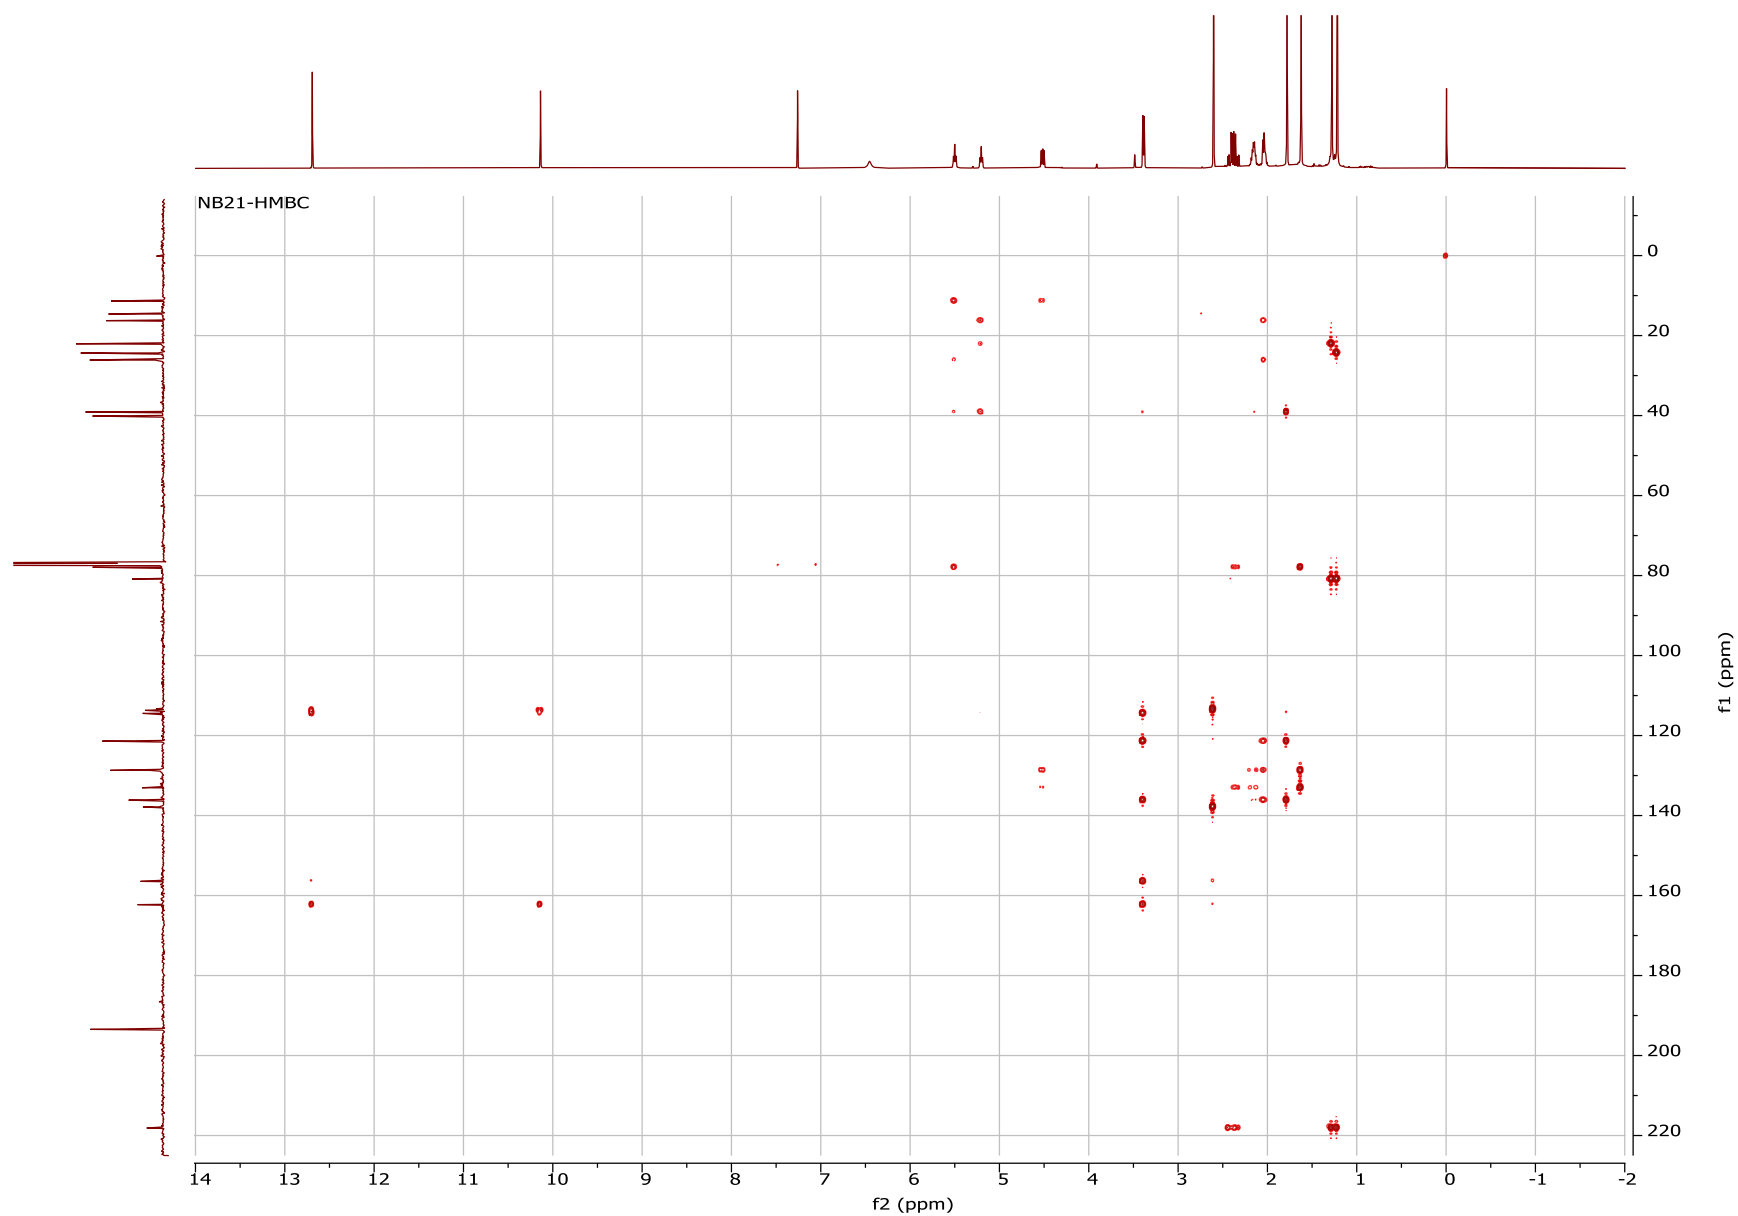

**Figure S33.** HMBC Spectrum of **3** in  $\text{CDCl}_3$ .



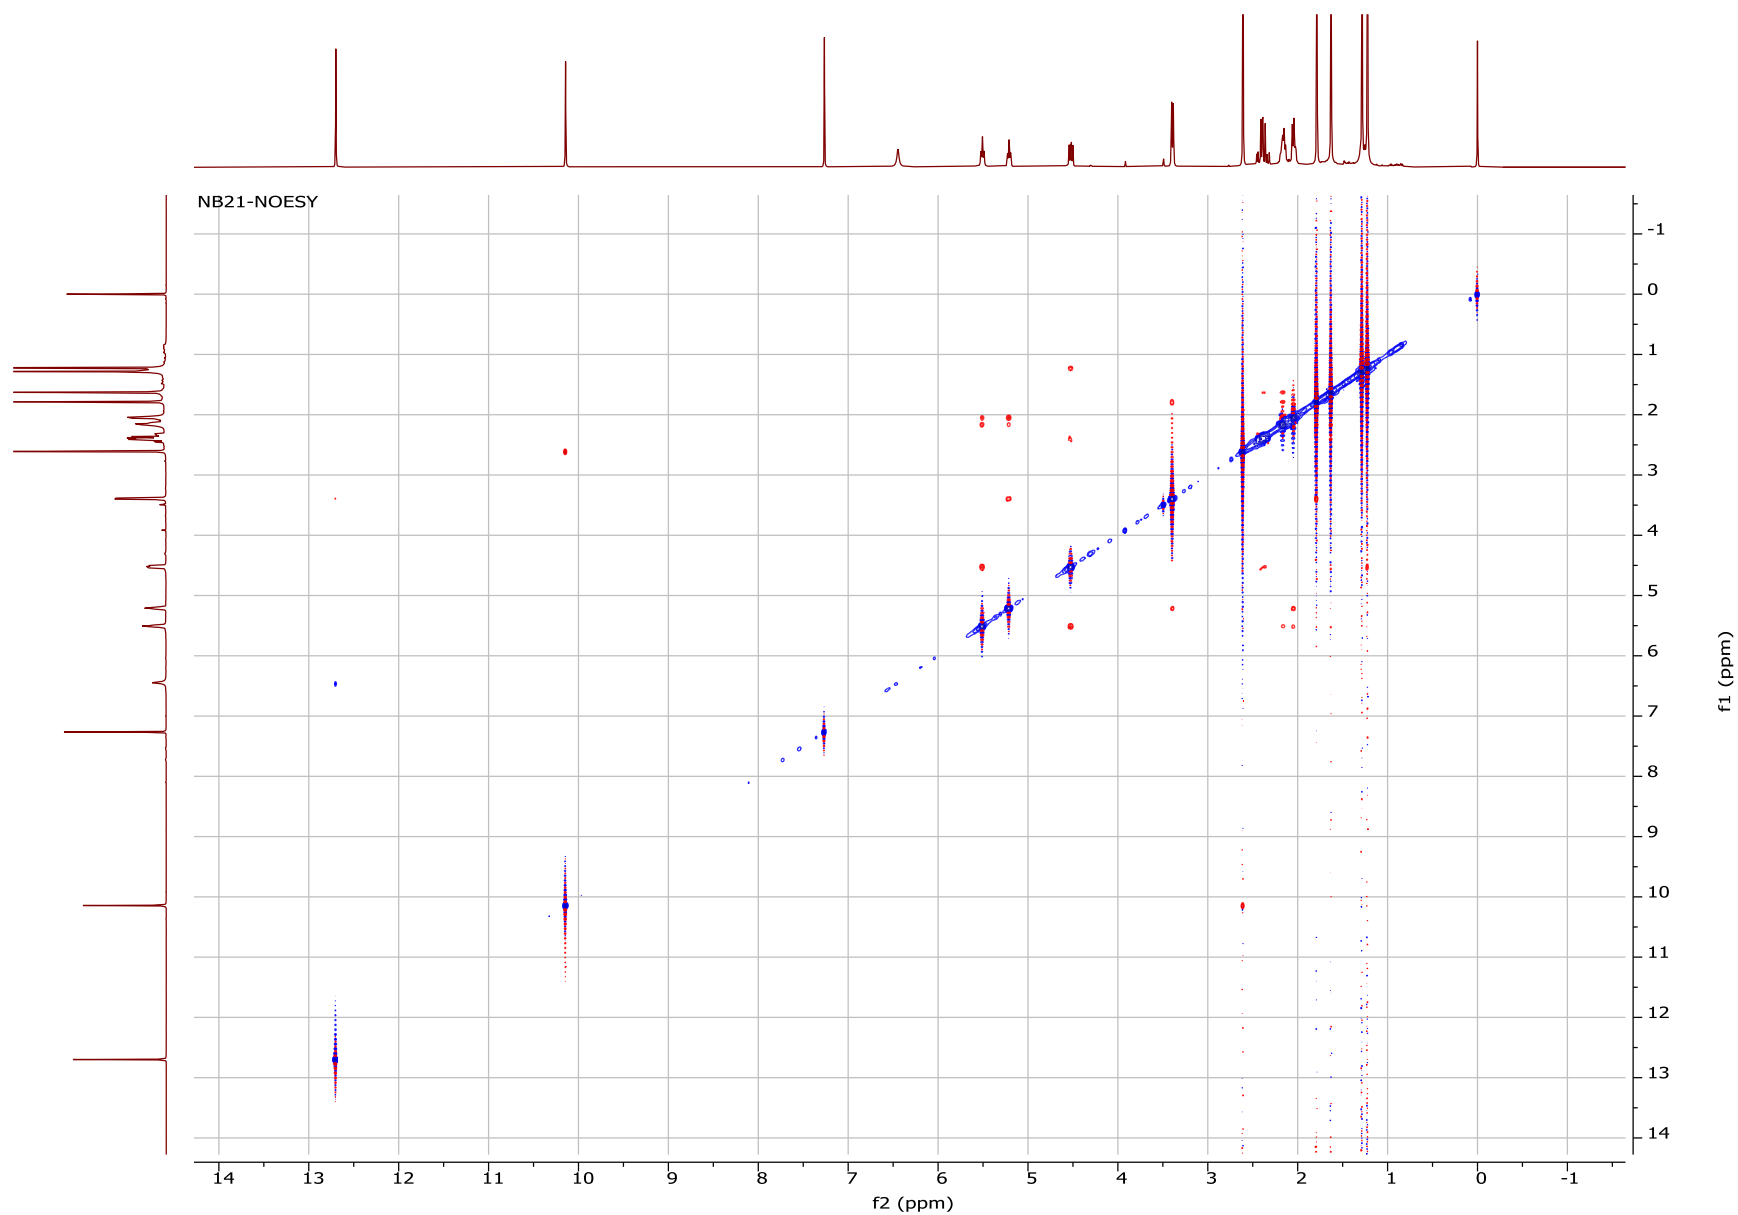

**Figure S35.** NOESY Spectrum of **3** in  $\text{CDCl}_3$ .

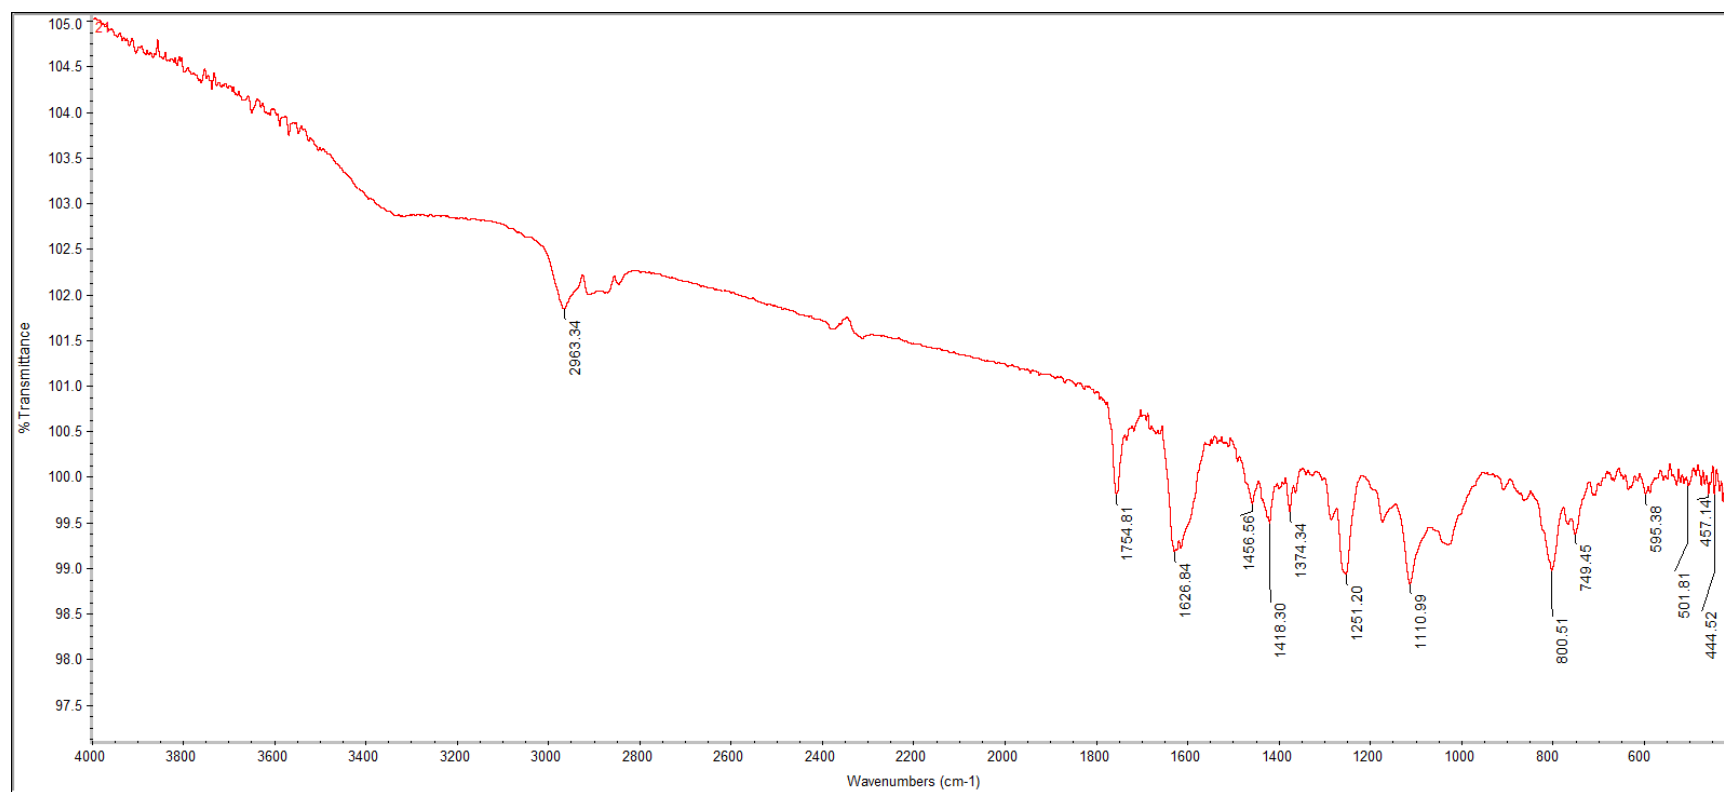

**Figure S36.** IR spectrum of compound **3**.

C-1 #1122-1132 RT: 6.32-6.37 AV: 11 NL: 2.39E8  
T: FTMS + p ESI Full ms [200.0000-800.0000]

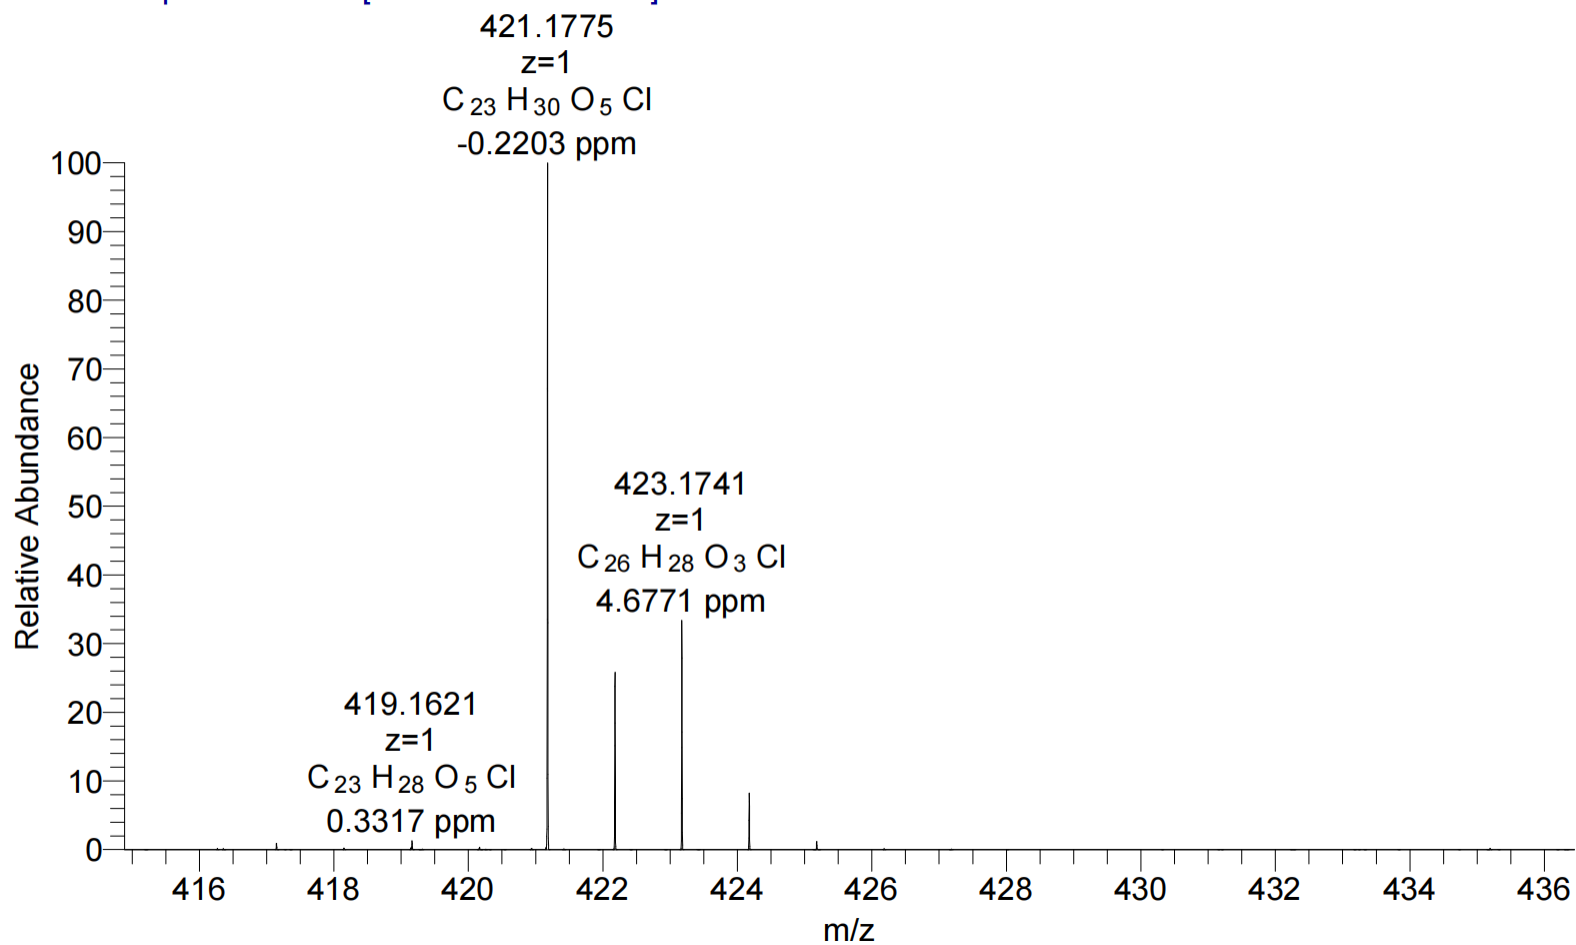

Figure S37. HR-ESIMS of compound 3.

ZLN39-HNMR

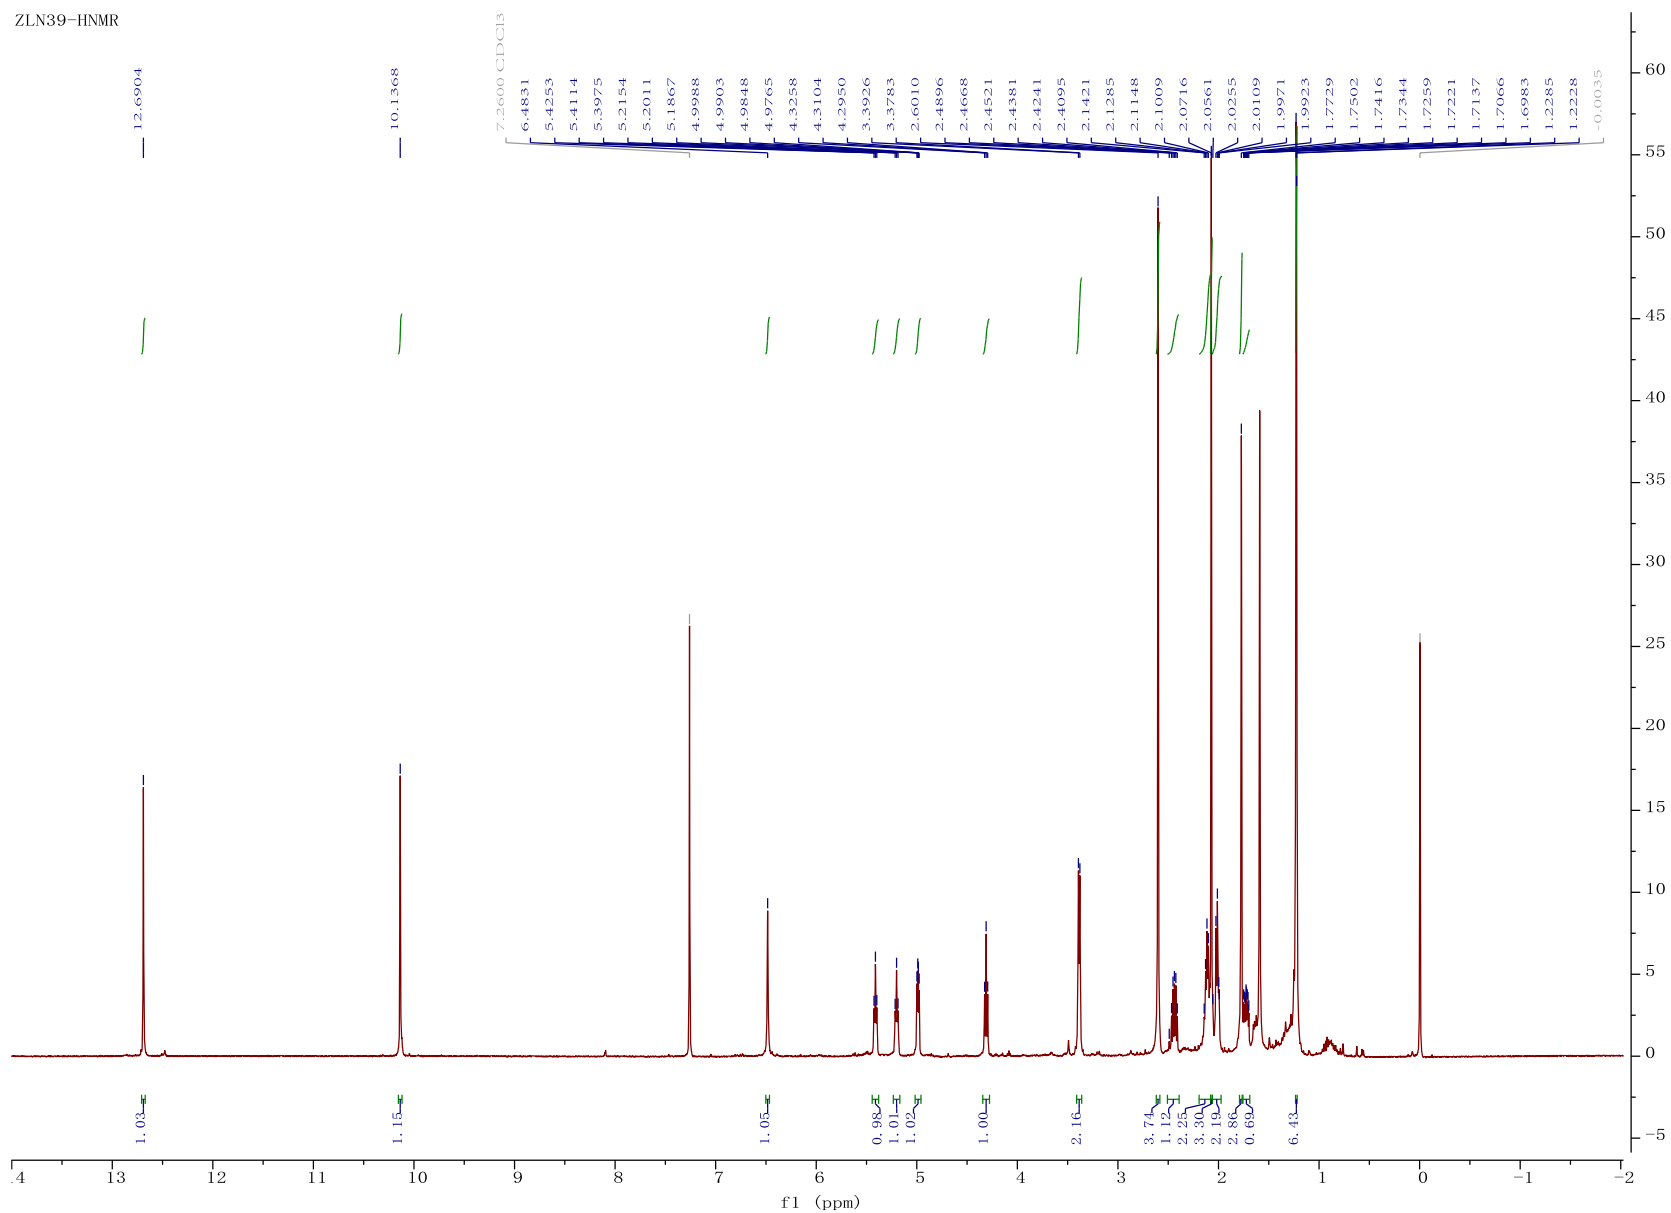

**Figure S38.** <sup>1</sup>H NMR Spectrum of **4** in CDCl<sub>3</sub>.



ZLN39-CNMR

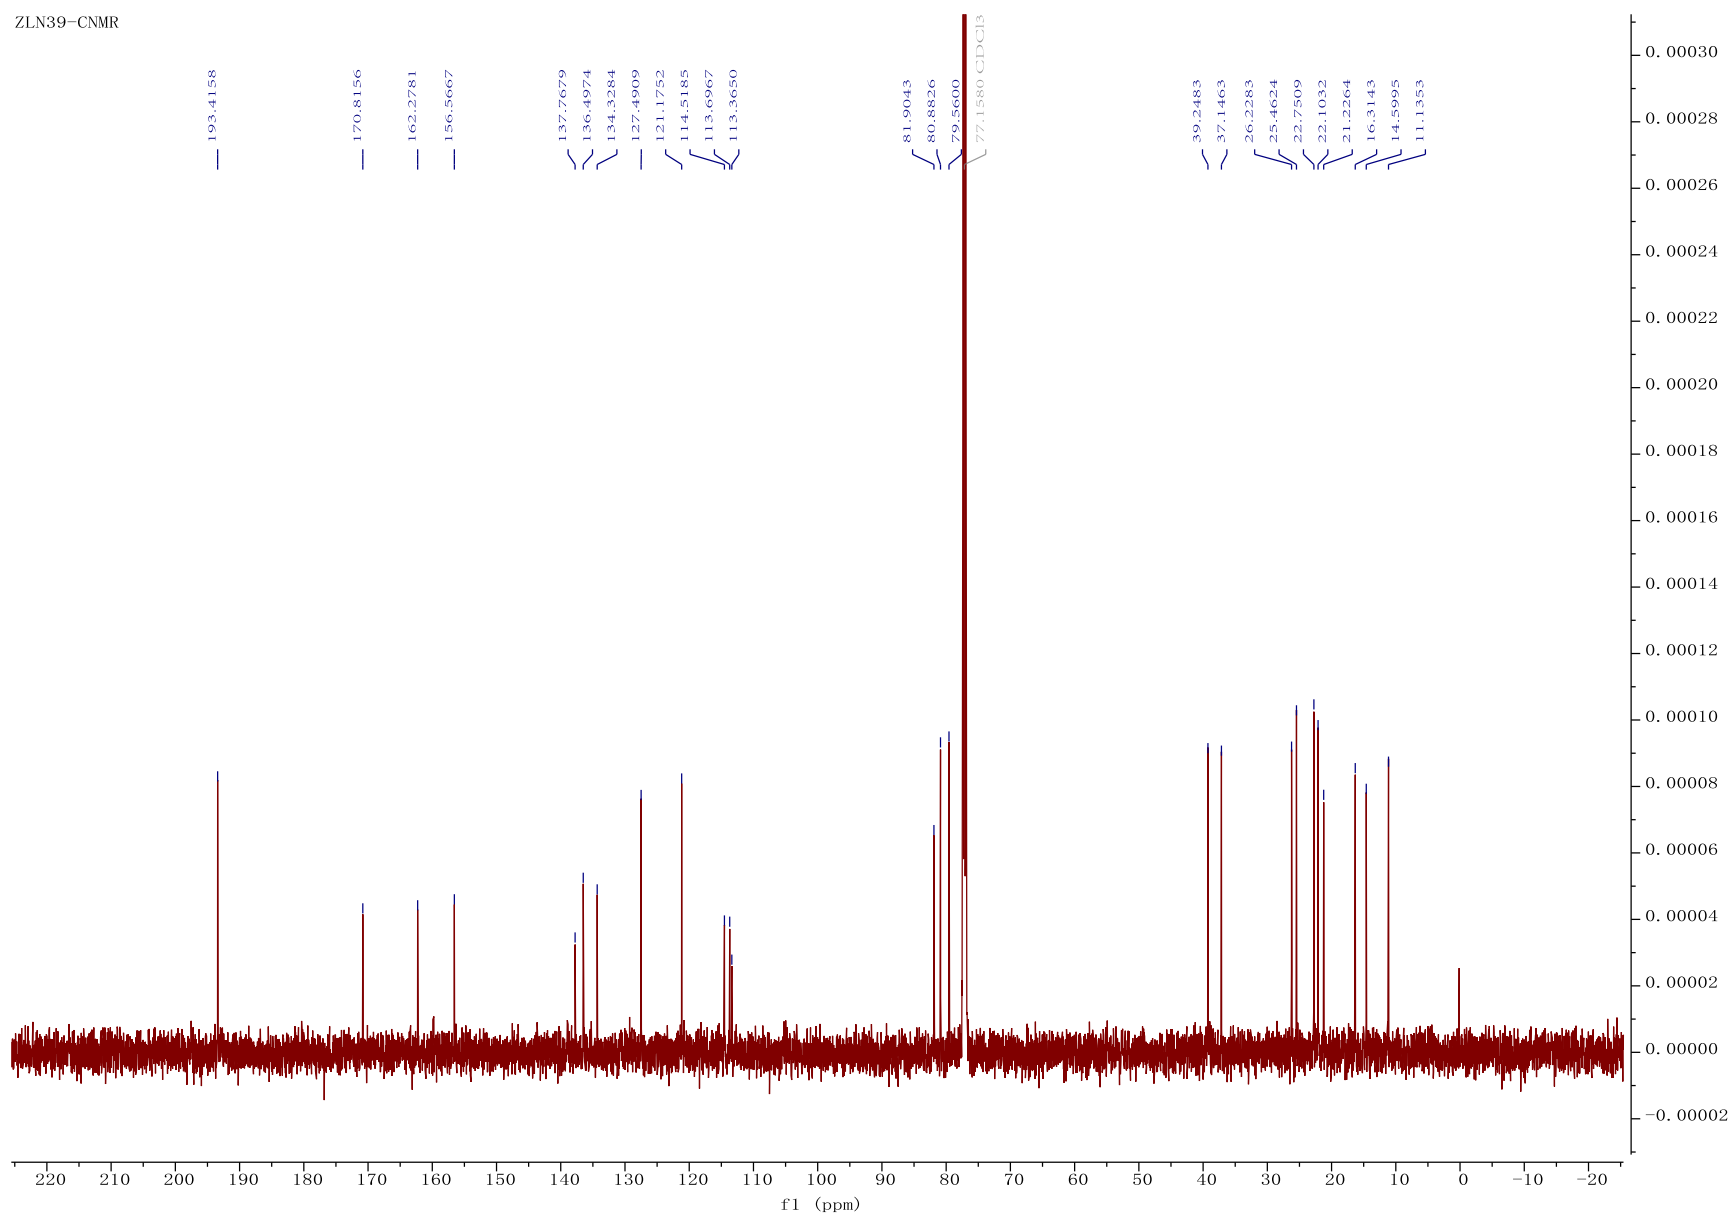

**Figure S39.** <sup>13</sup>C NMR Spectrum of **4** in CDCl<sub>3</sub>.

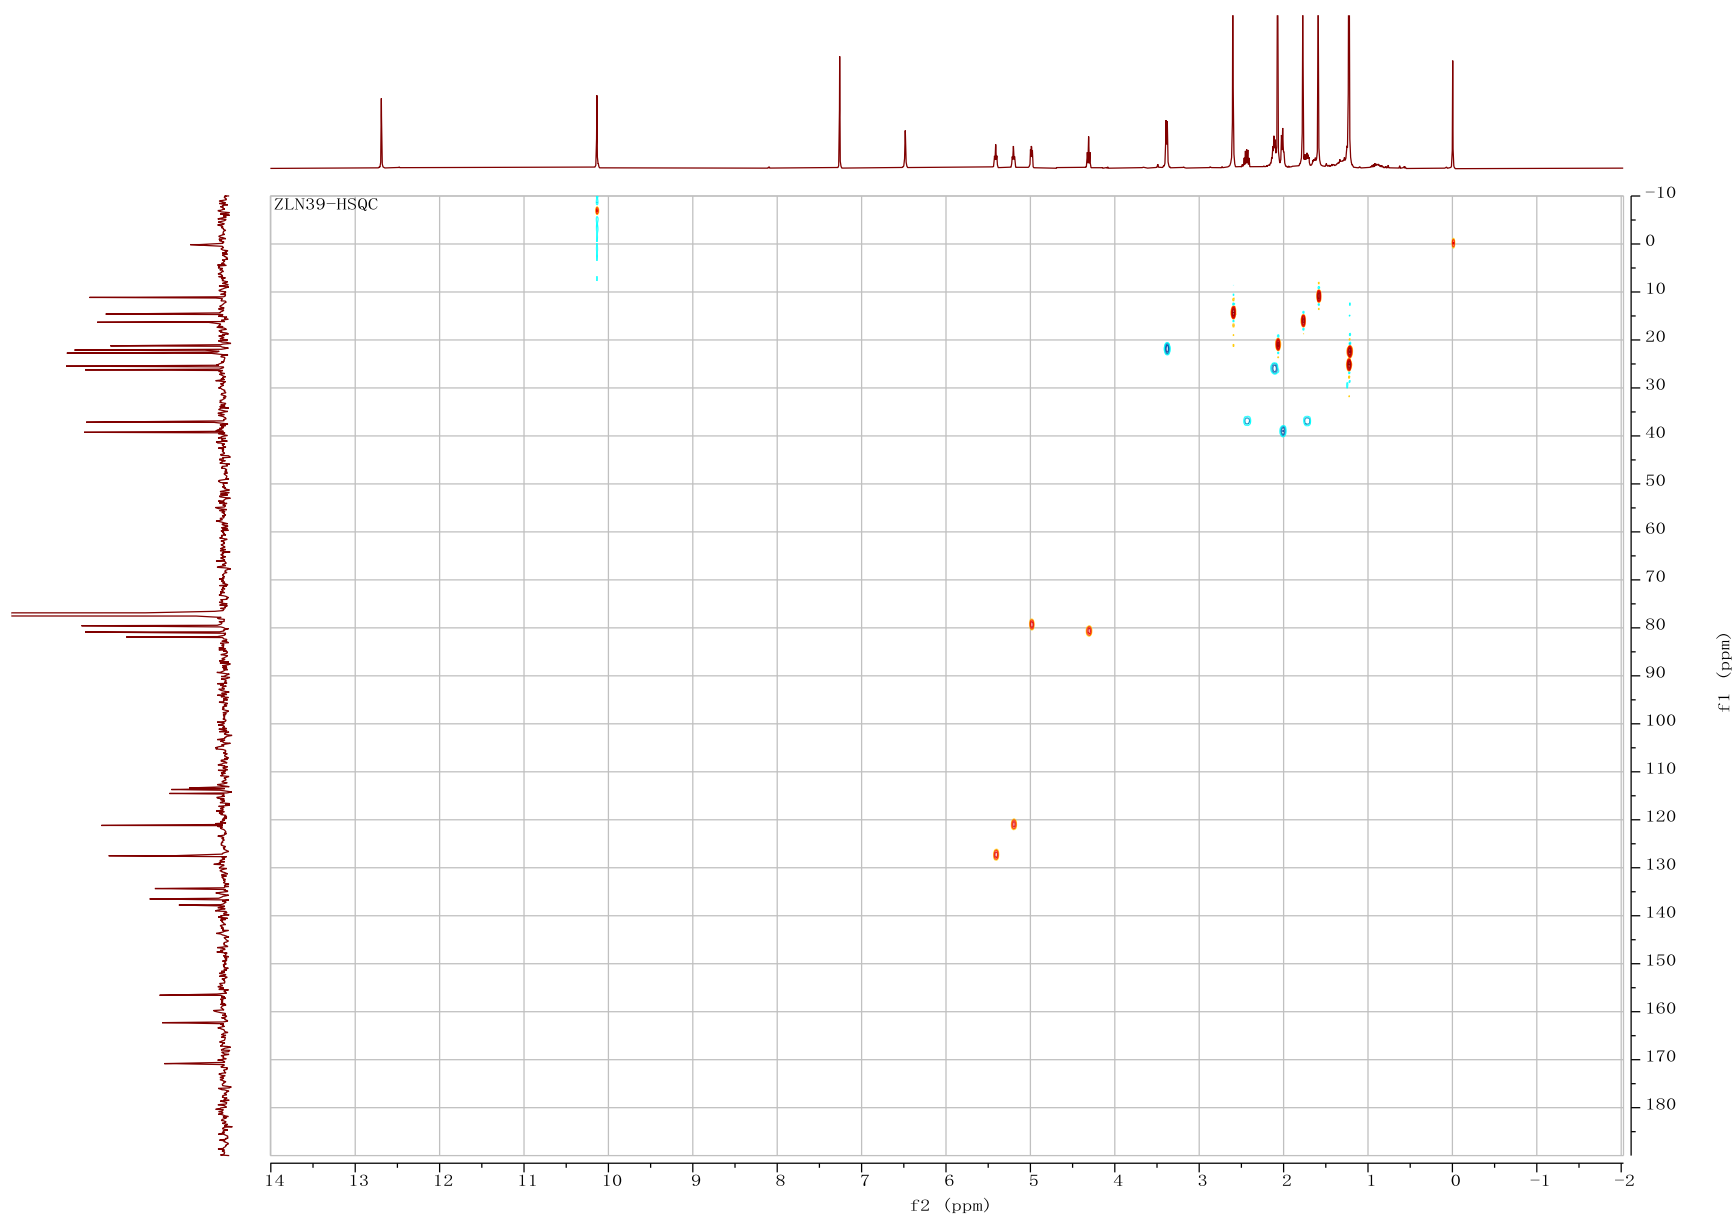

**Figure S40.** HSQC Spectrum of **4** in CDCl<sub>3</sub>.

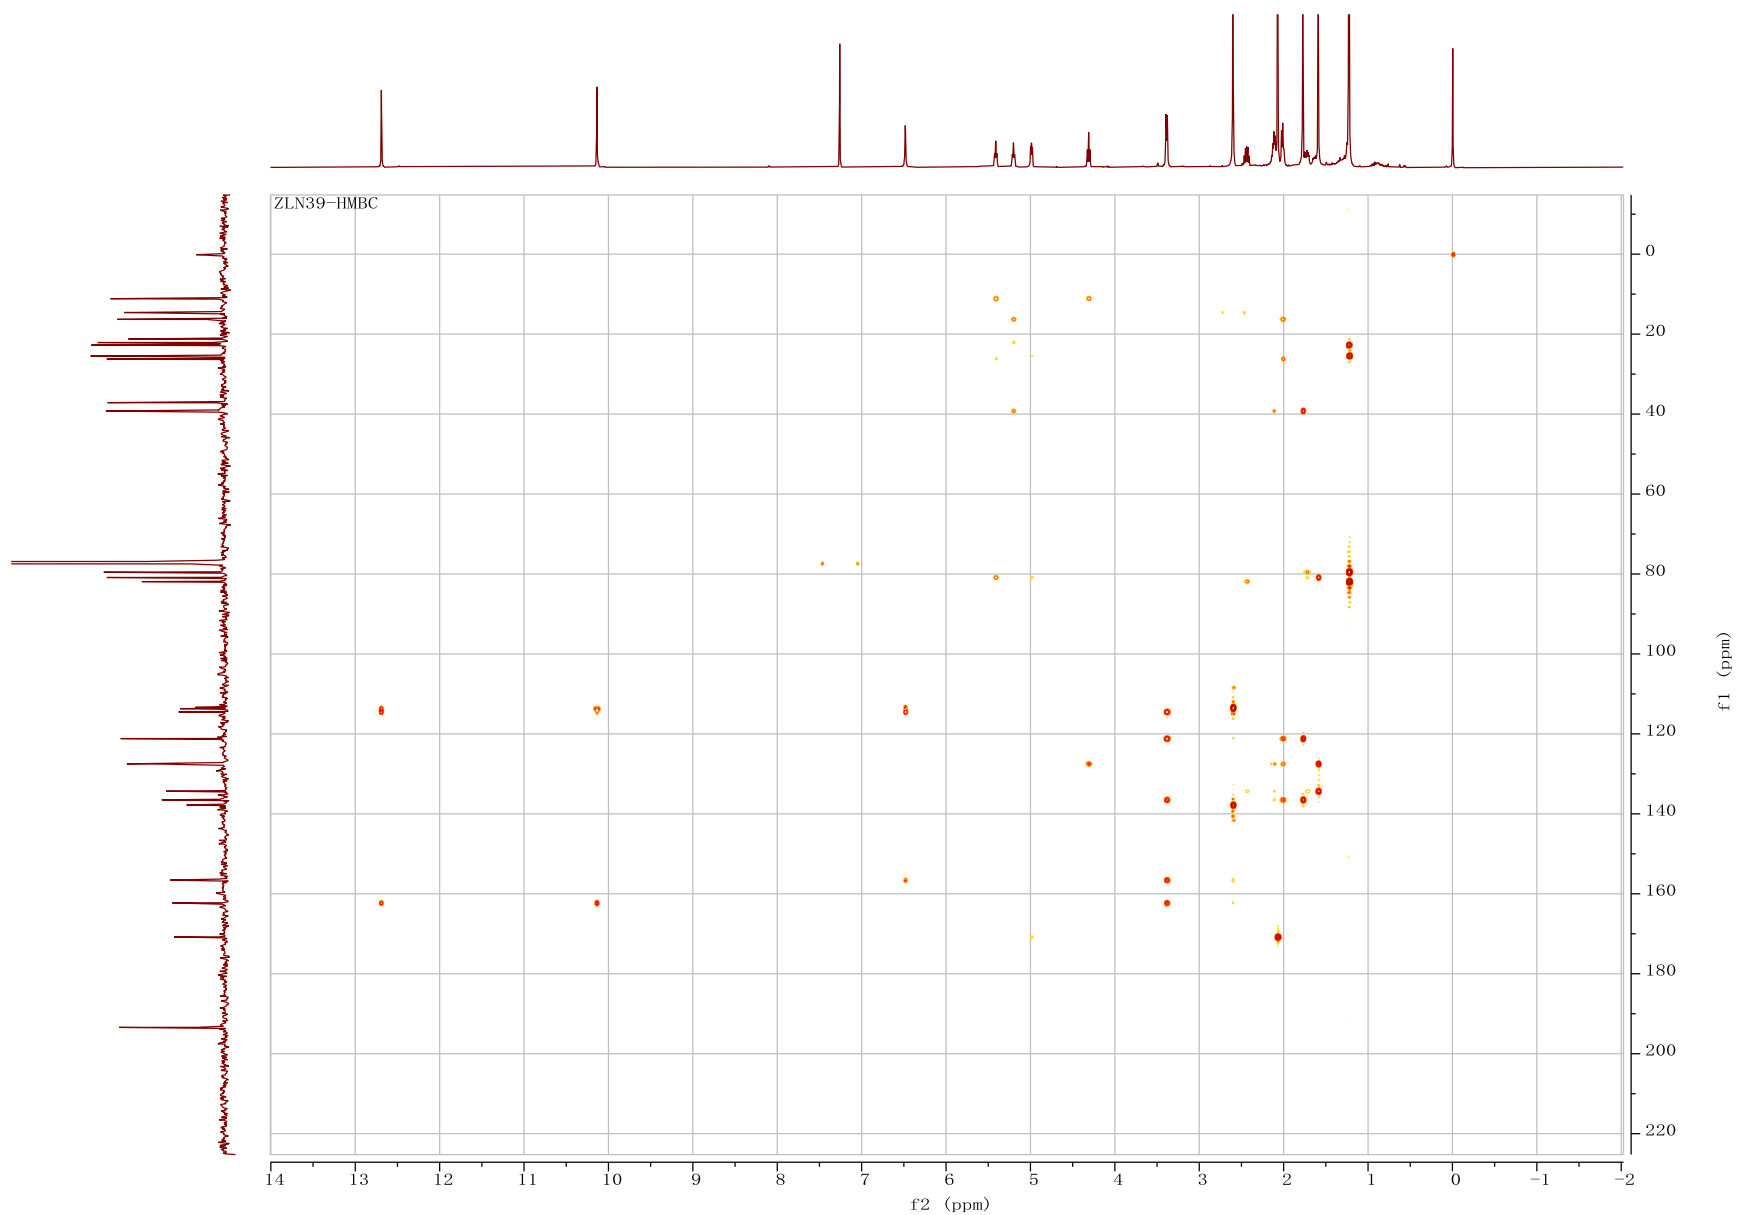

**Figure S41.** HMBC Spectrum of **4** in  $\text{CDCl}_3$ .

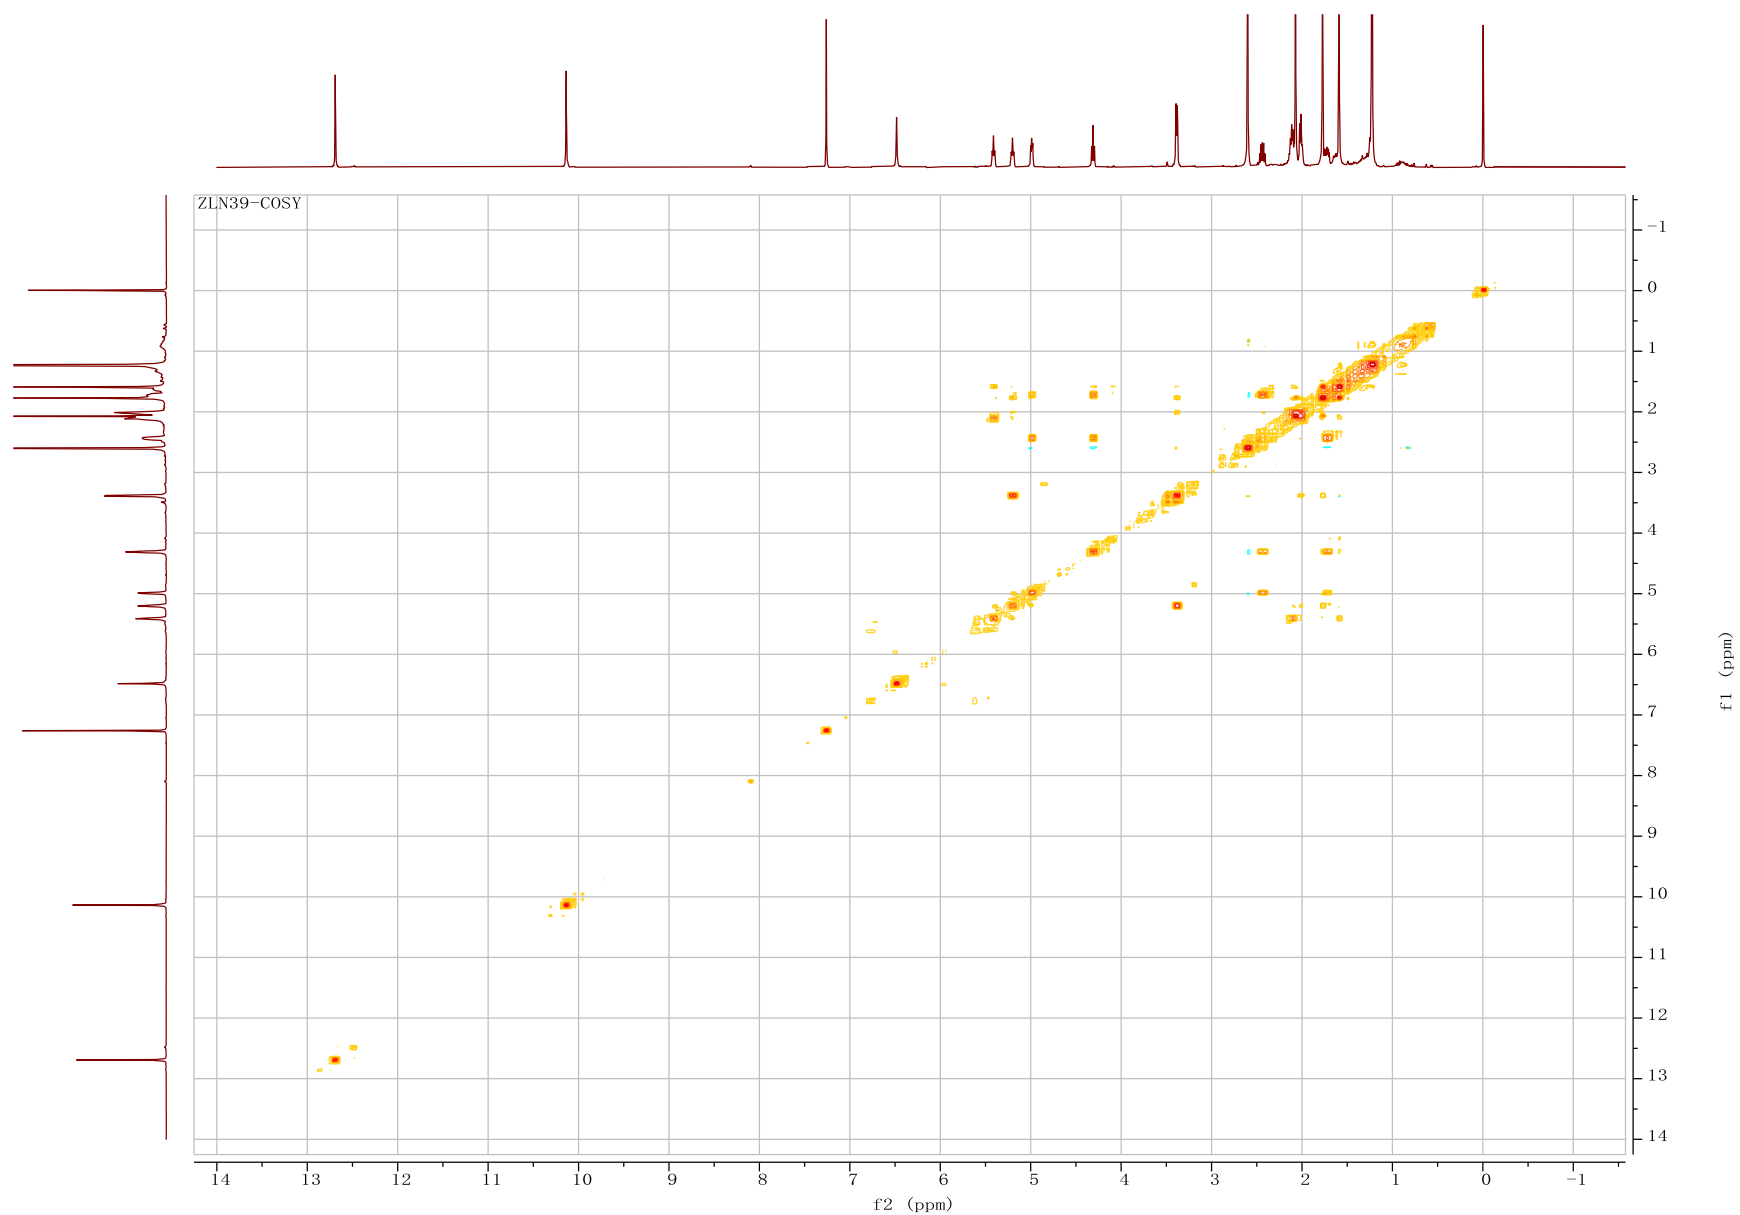

**Figure S42.** COSY Spectrum of **4** in CDCl<sub>3</sub>.

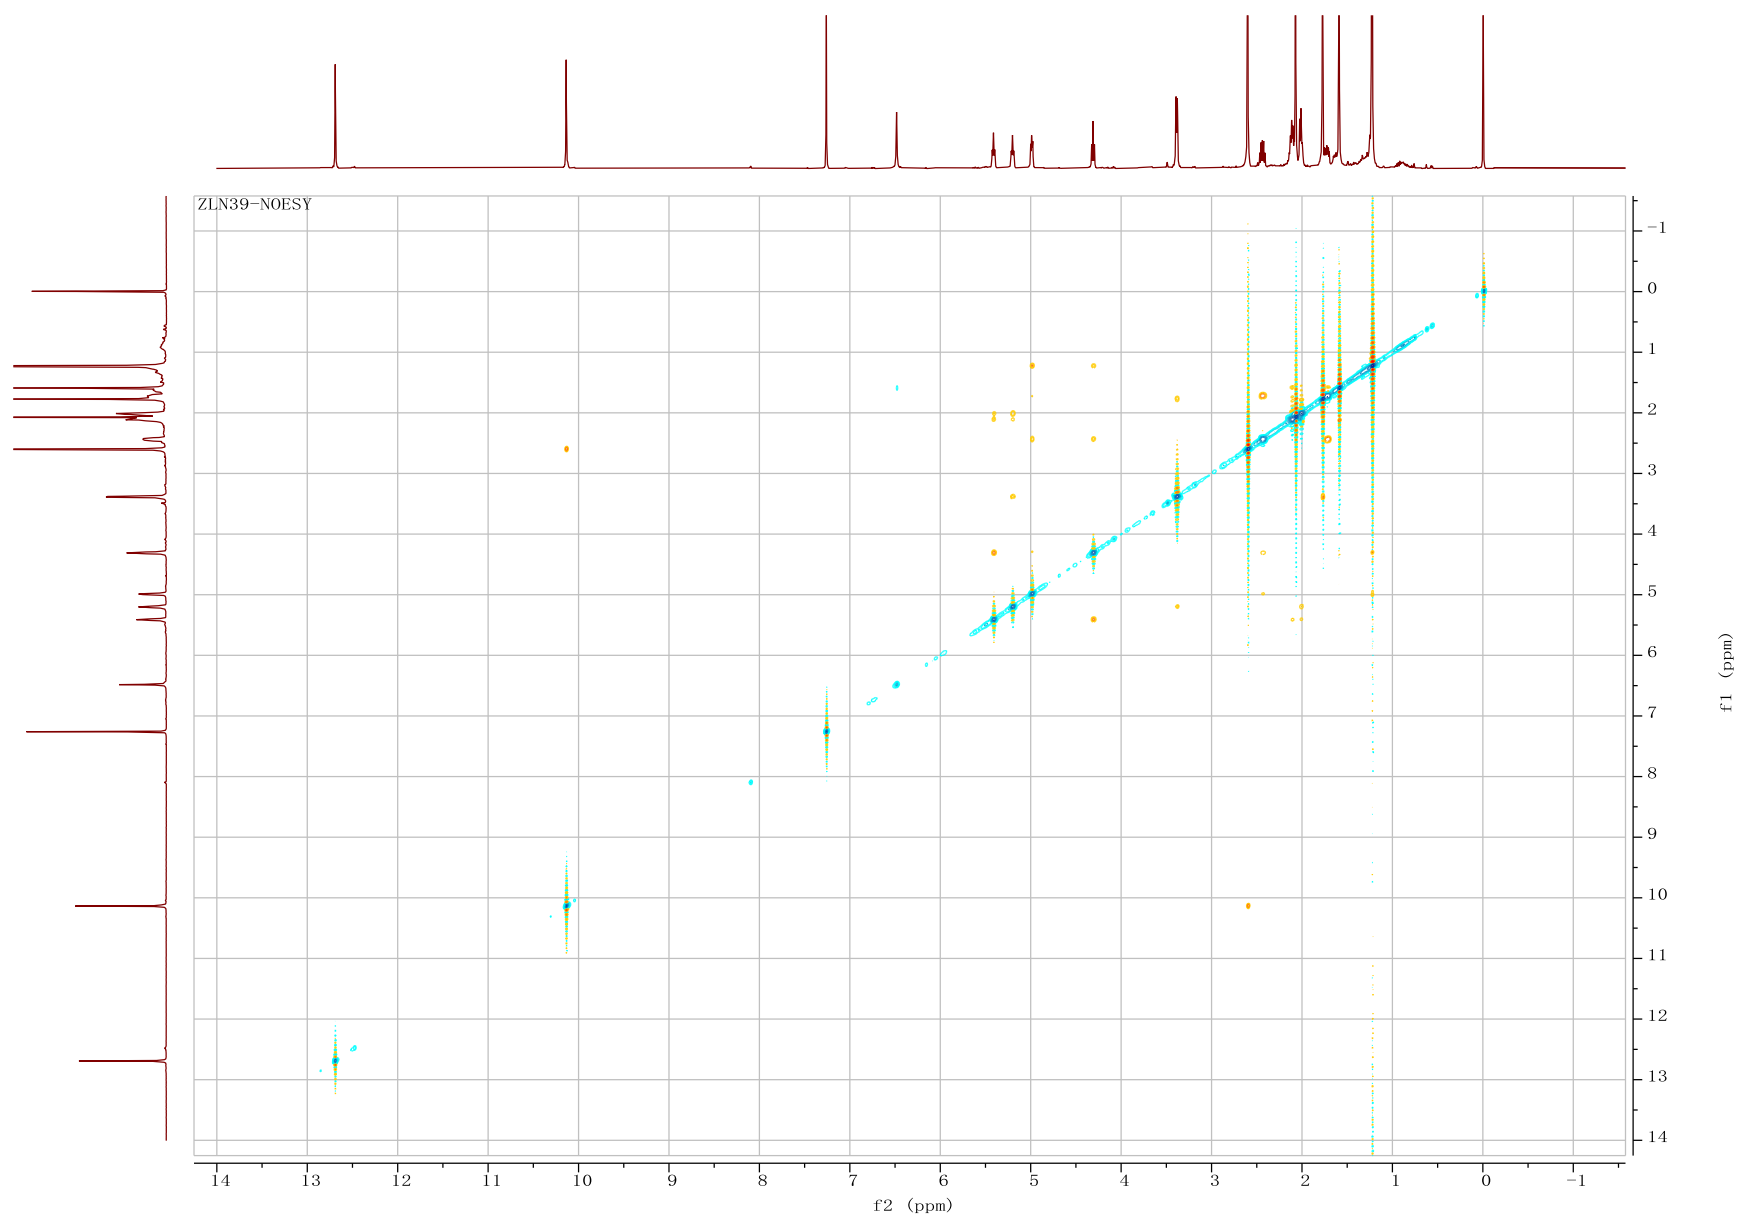

**Figure S43.** NOESY Spectrum of **4** in  $\text{CDCl}_3$ .

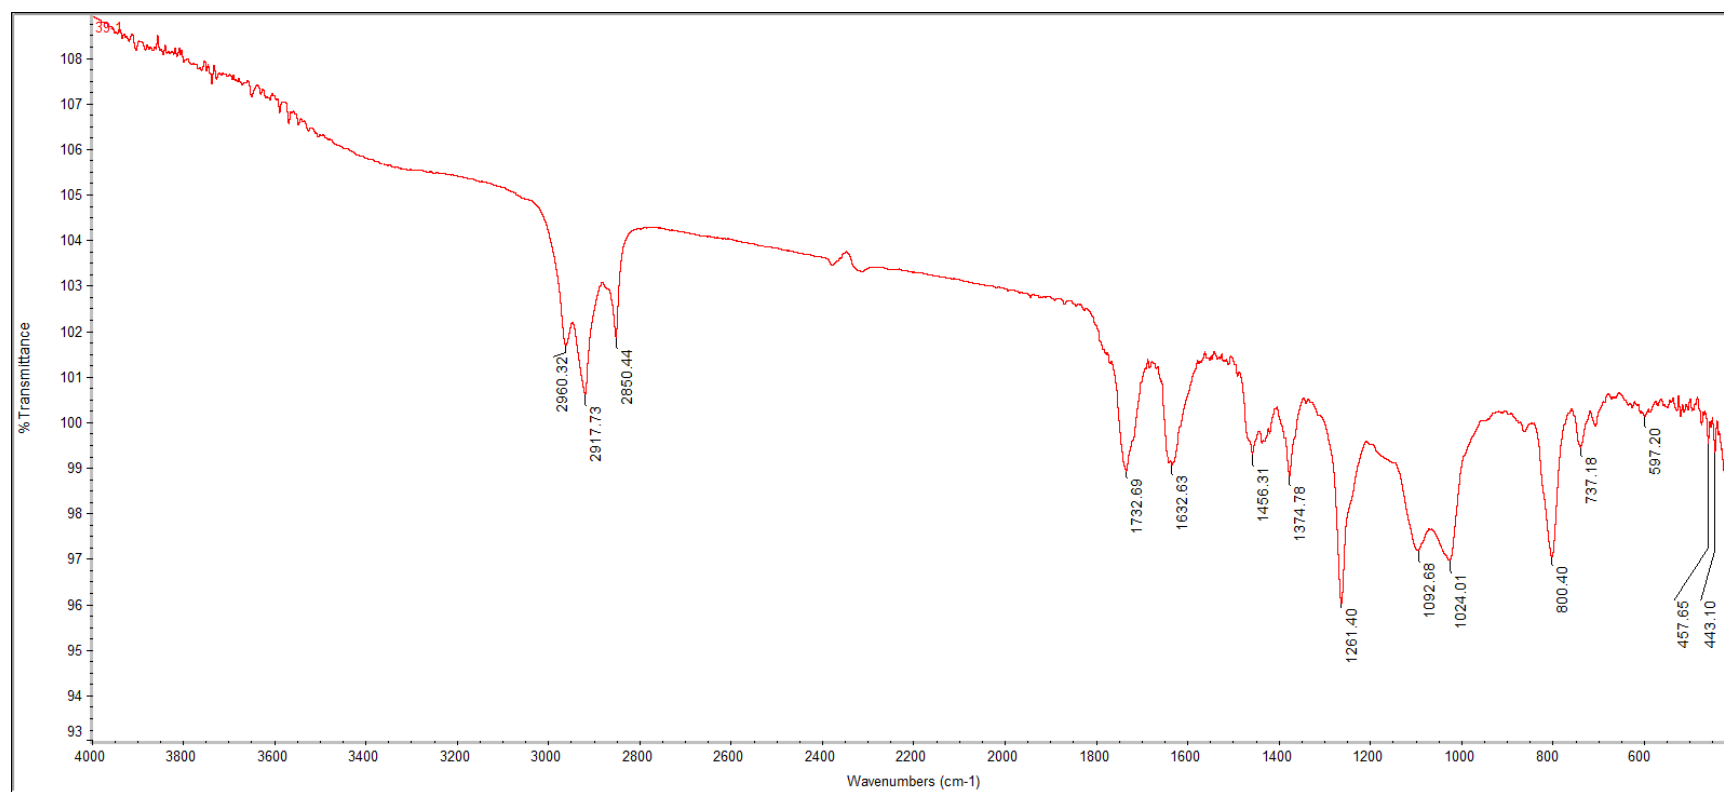

**Figure S44.** IR spectrum of compound 4.

QX\_39\_Pos #5260 RT: 11.76 AV: 1 NL: 3.91E8  
T: FTMS + p ESI Full ms [70.0000-1200.0000]

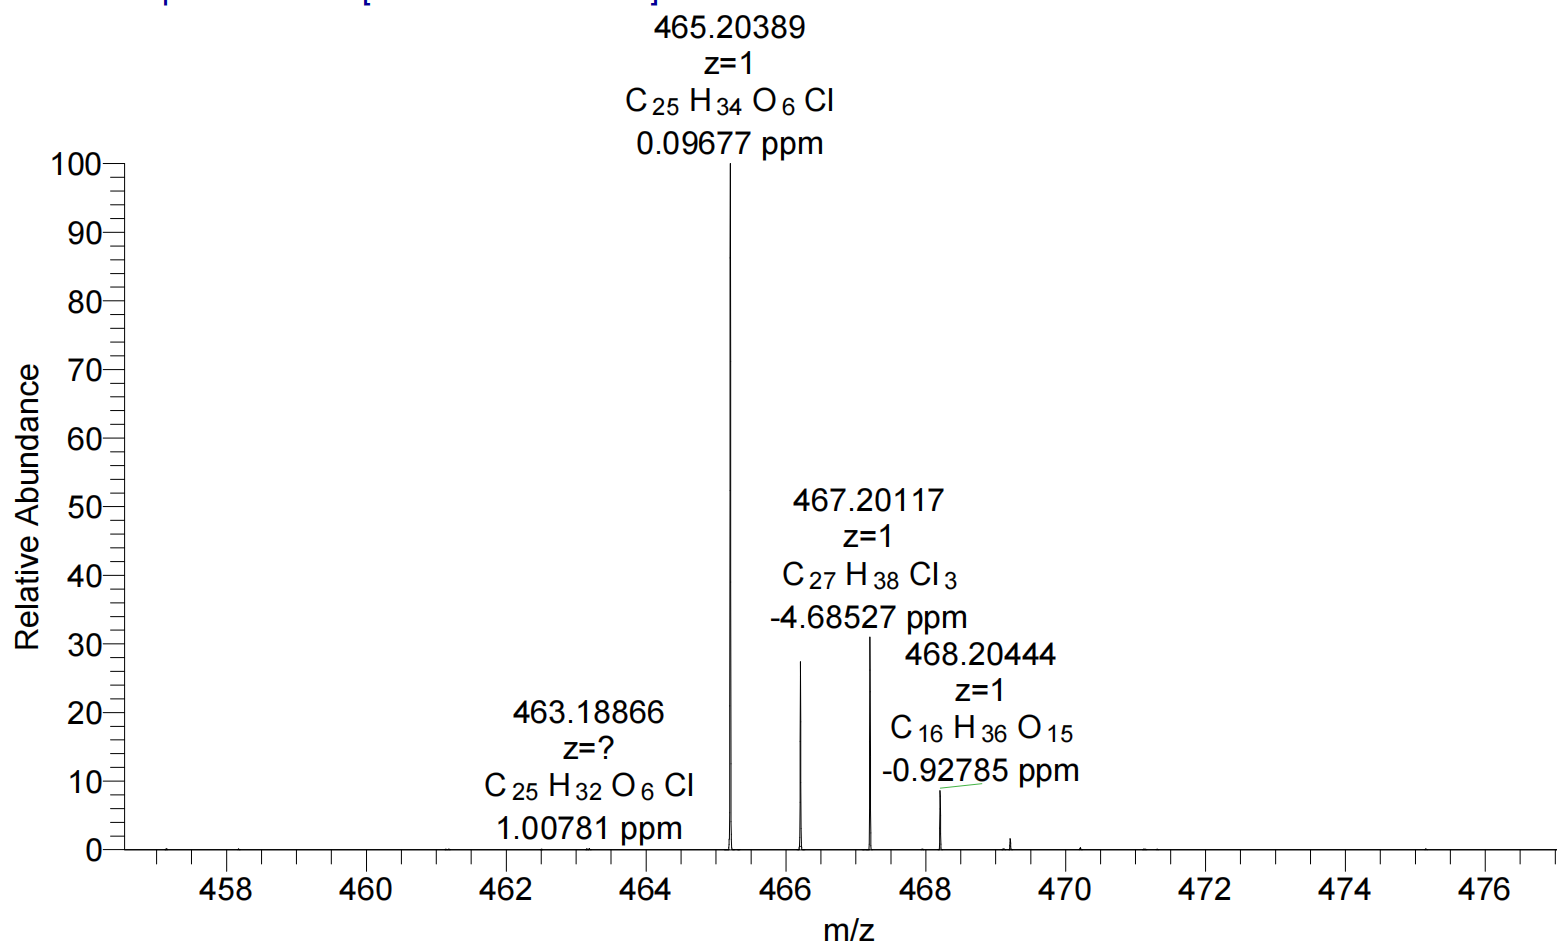

Figure S45. HR-ESIMS of compound 4.

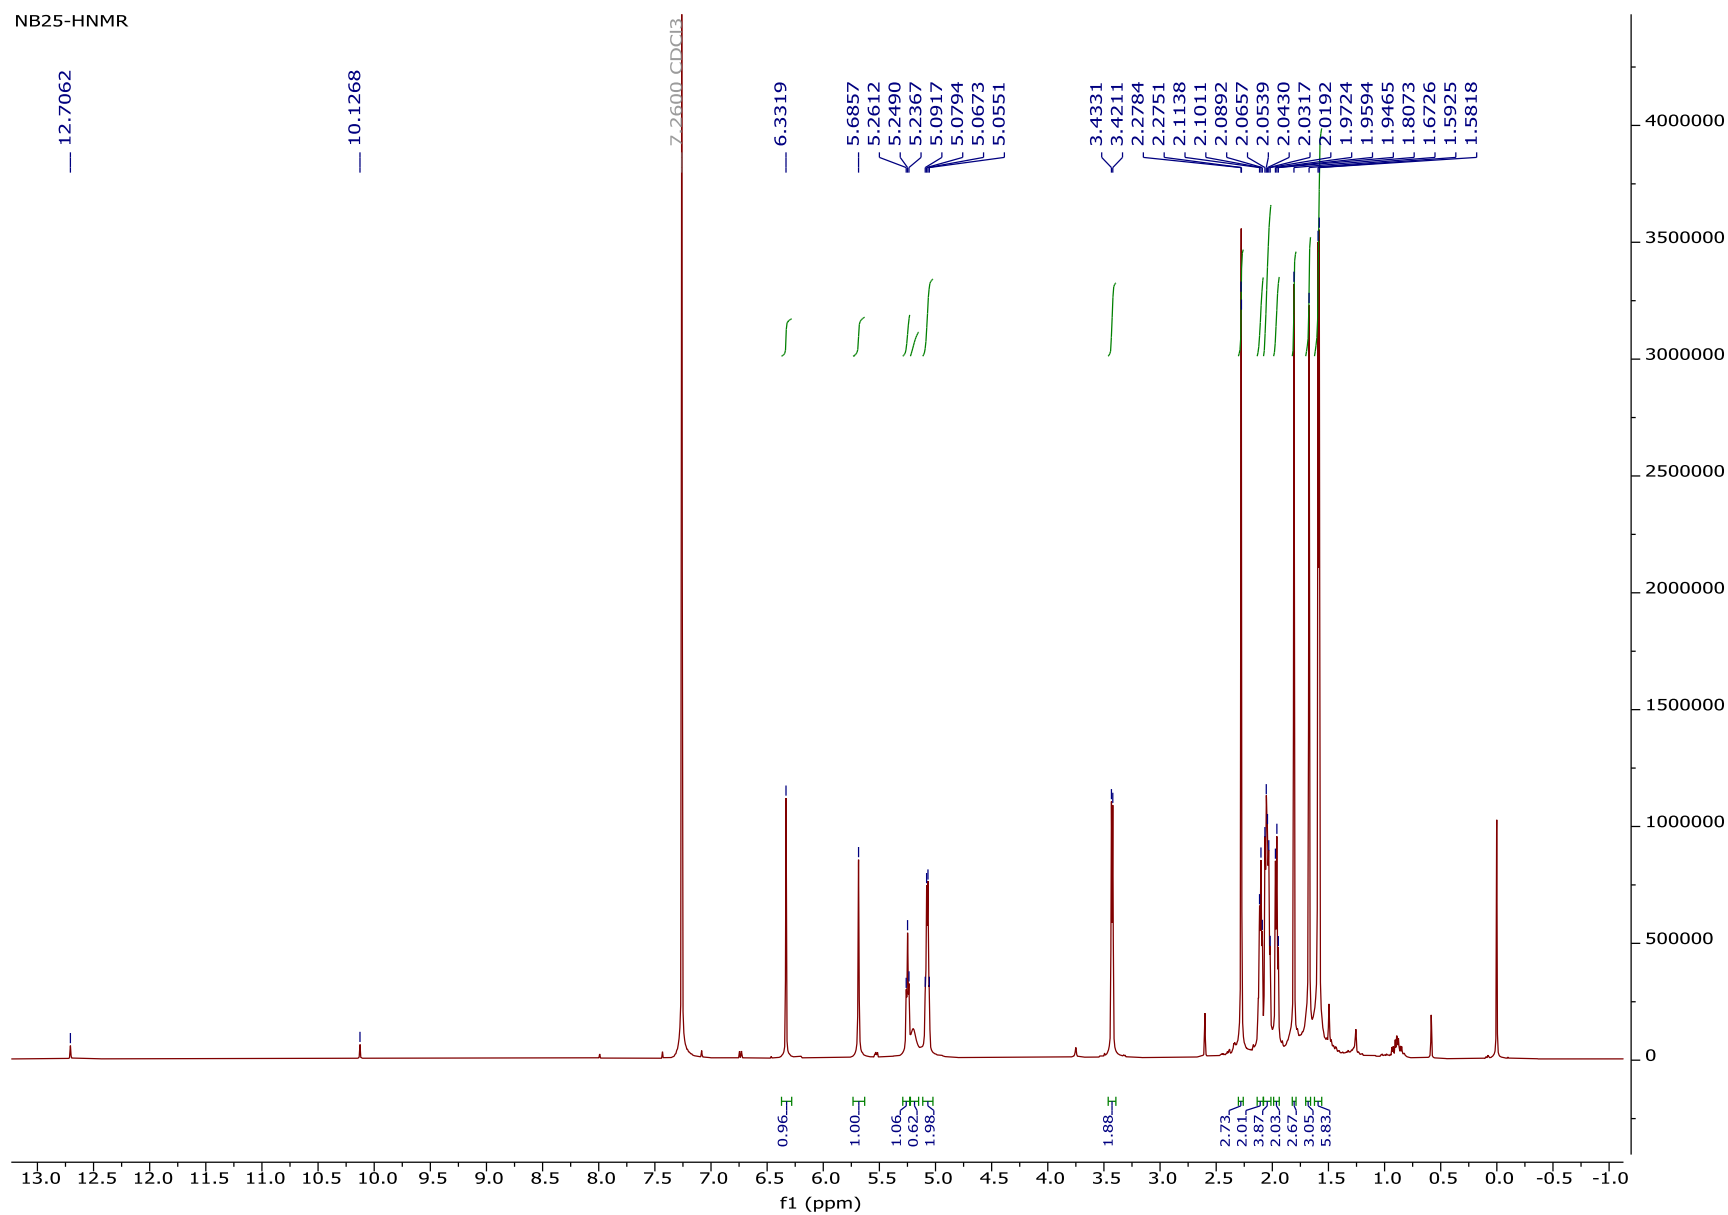

**Figure S46.**  $^1\text{H}$  NMR Spectrum of **5** in  $\text{CDCl}_3$ .



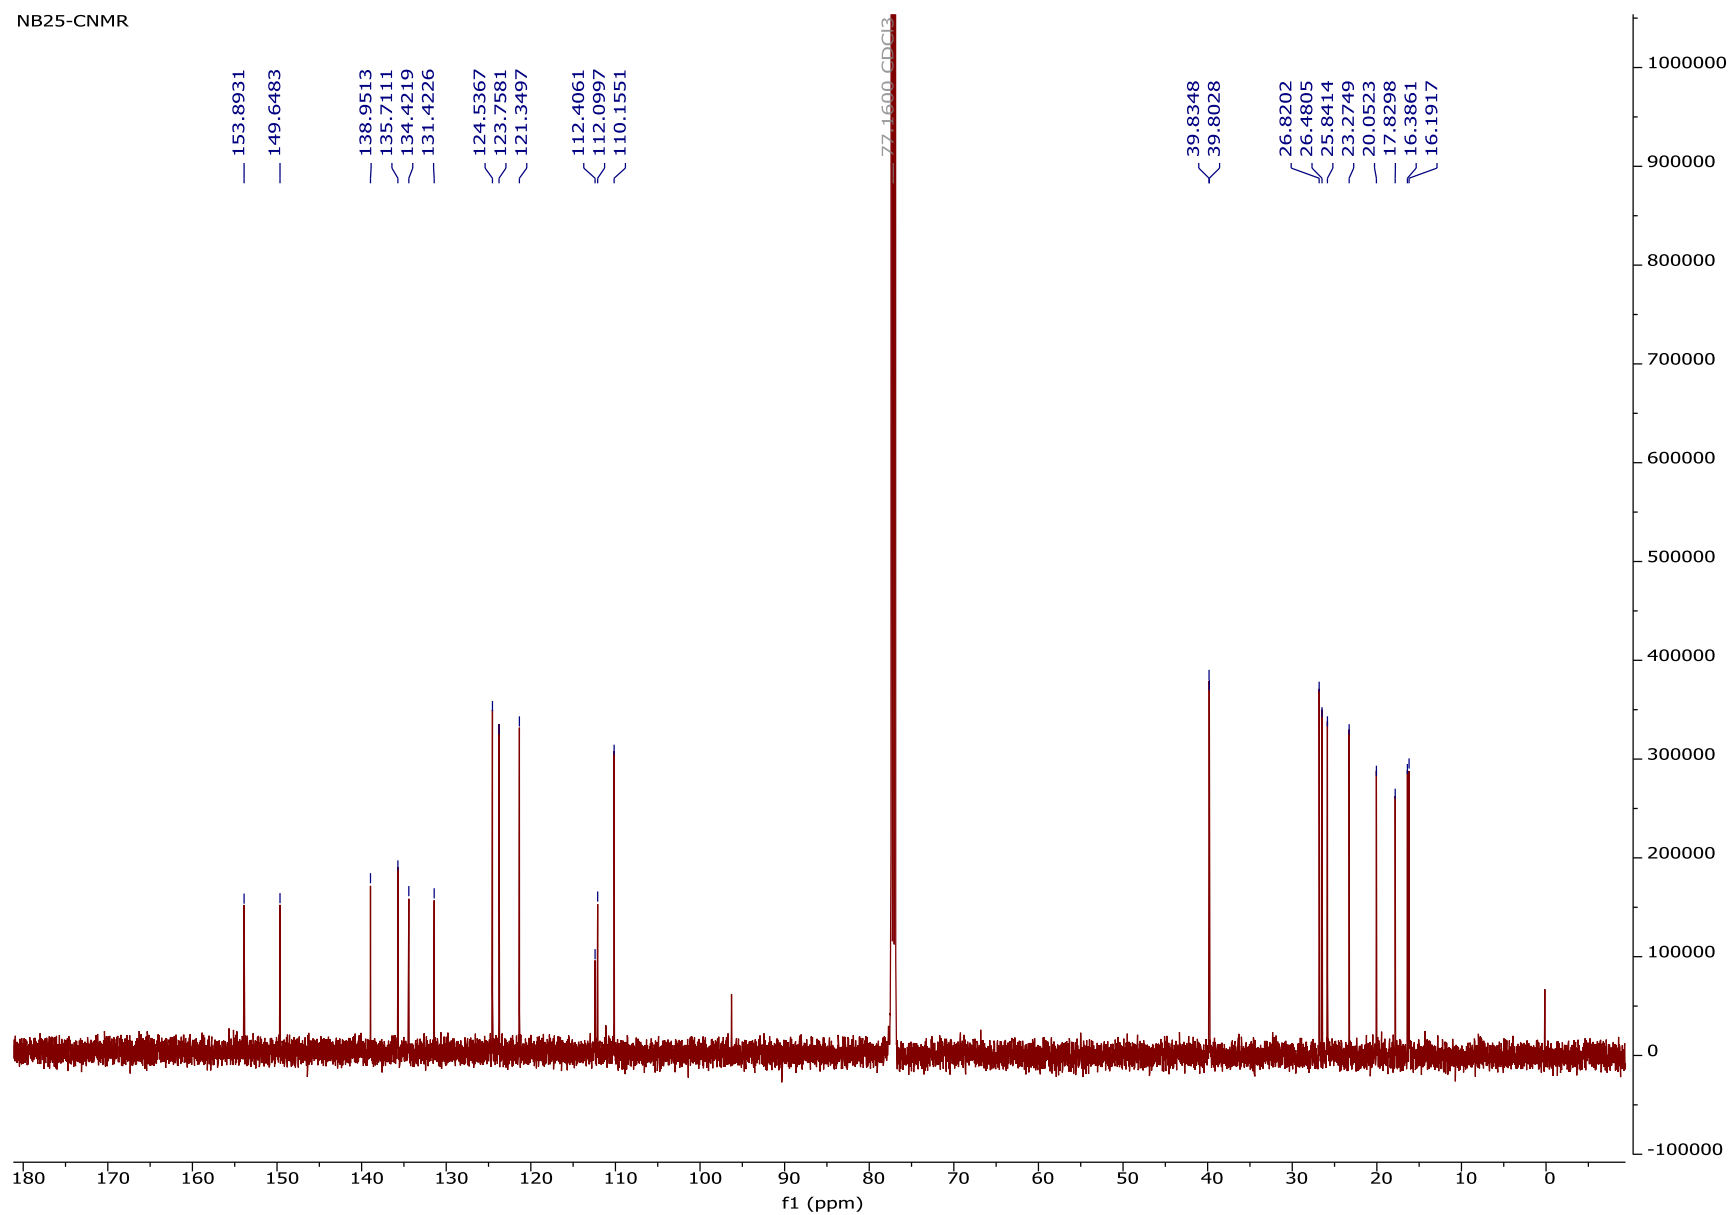

**Figure S47.**  $^{13}\text{C}$  NMR Spectrum of **5** in  $\text{CDCl}_3$ .

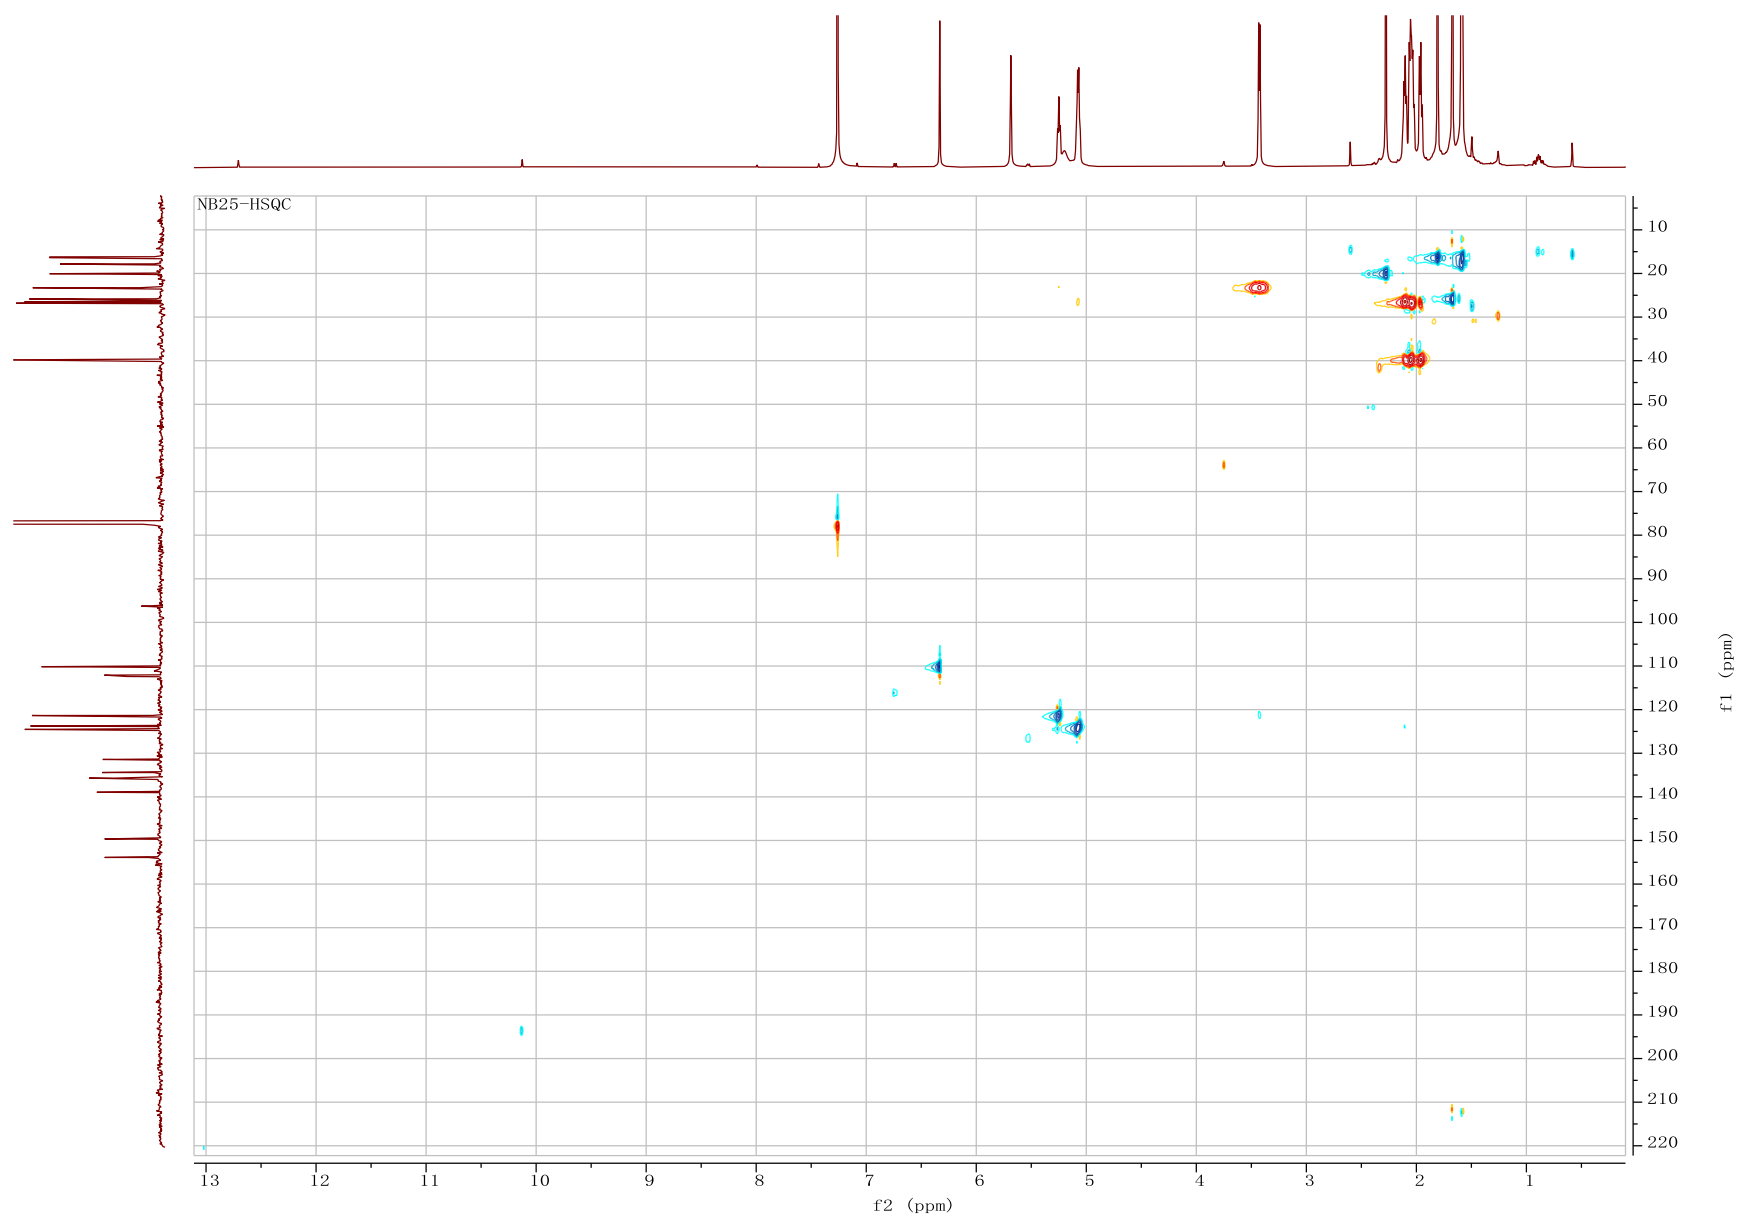

**Figure S48.** HSQC Spectrum of **5** in  $\text{CDCl}_3$ .

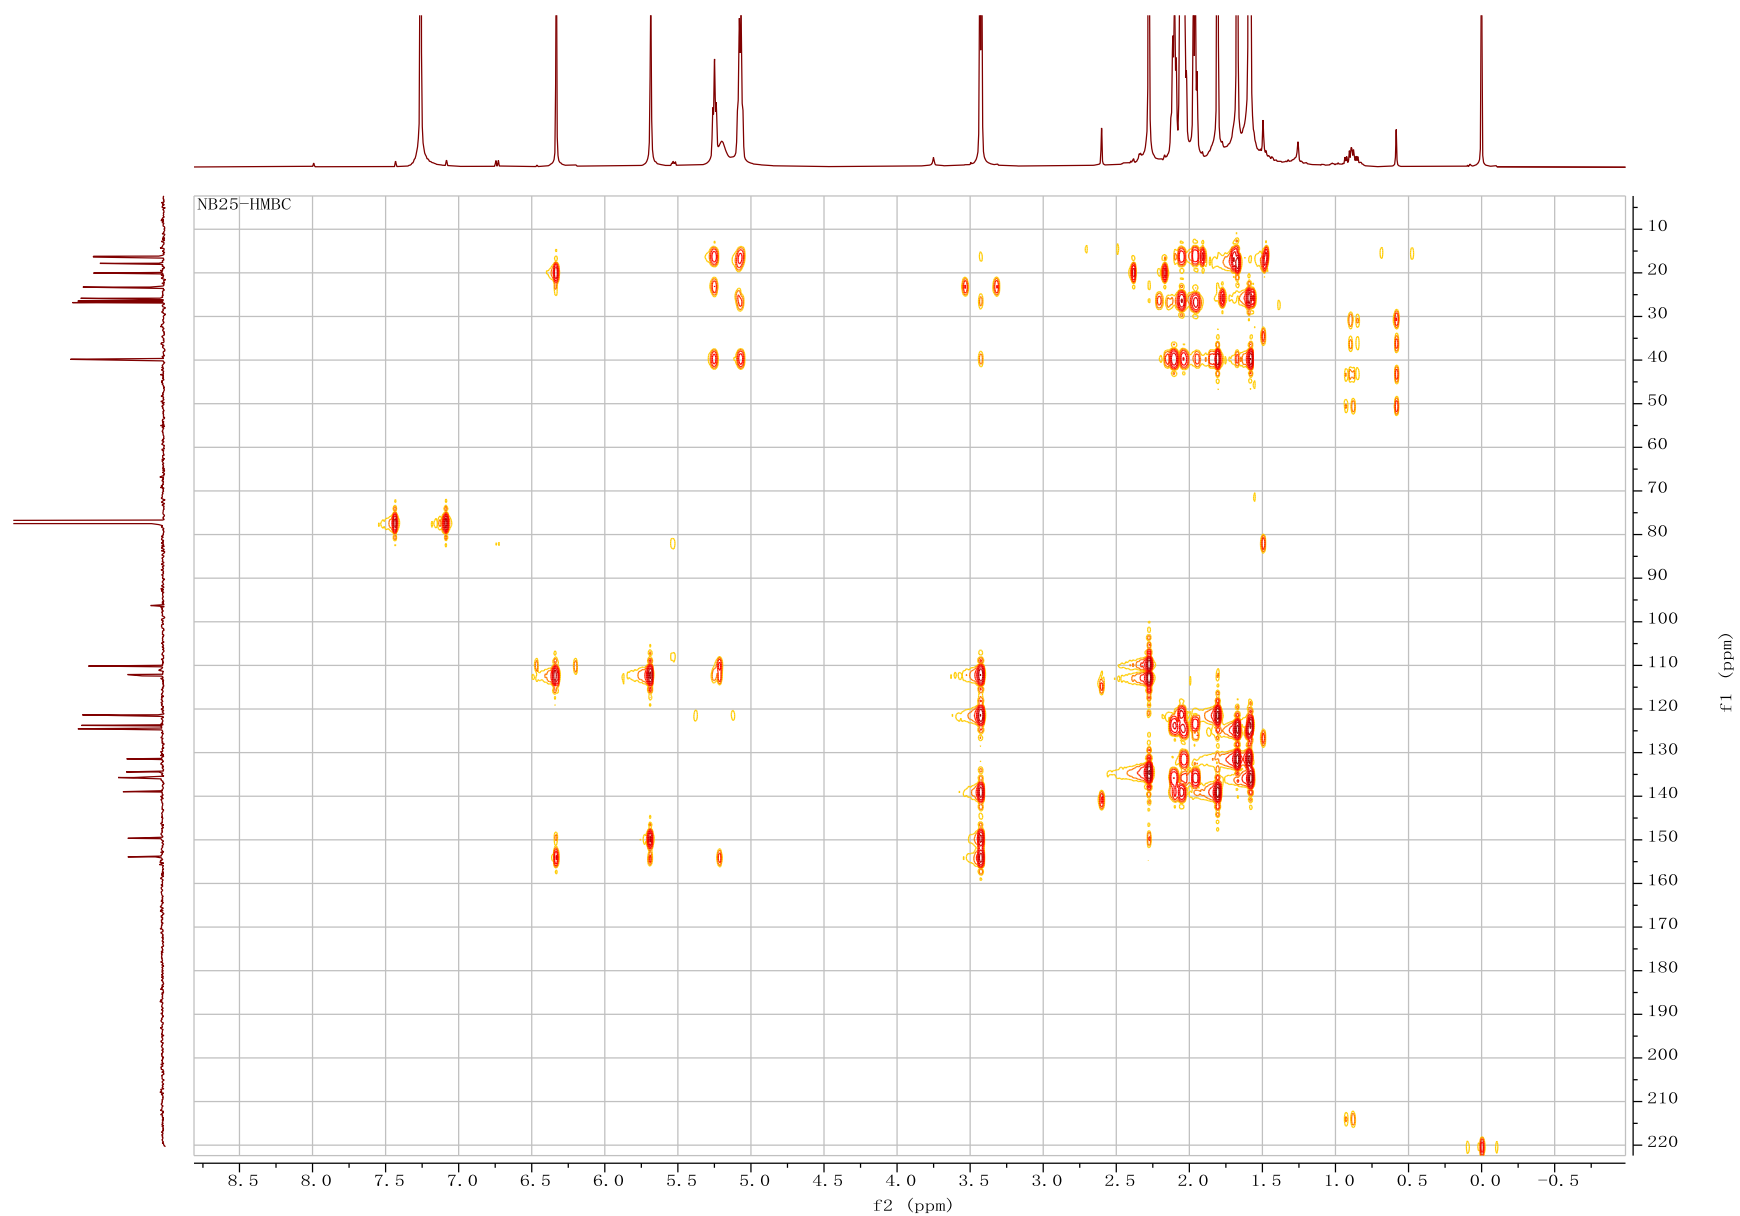

**Figure S49.** HMBC Spectrum of **5** in  $\text{CDCl}_3$ .

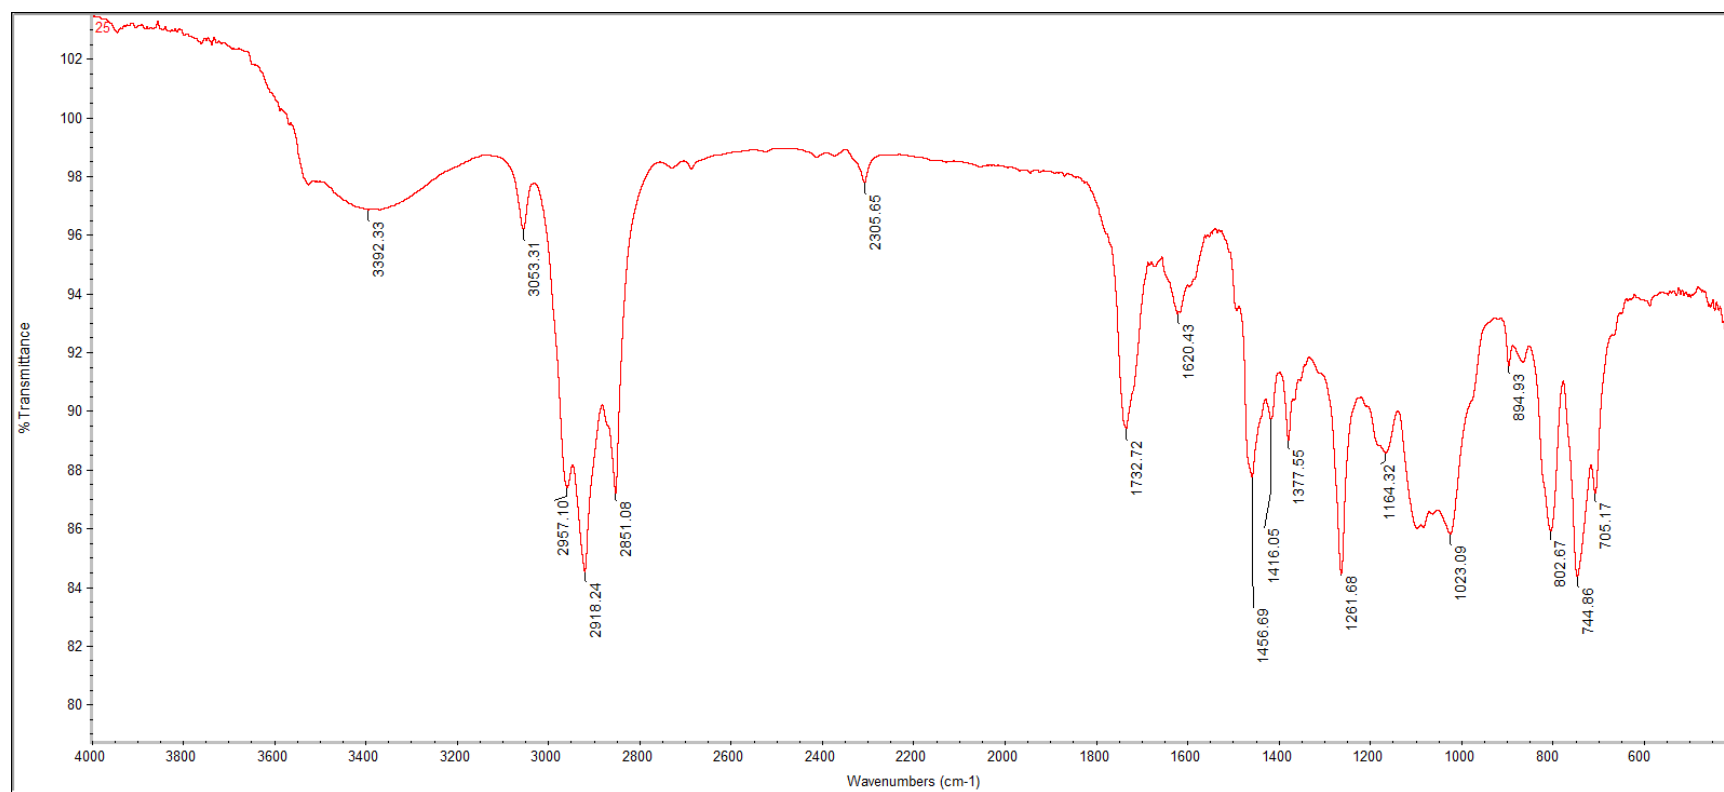

**Figure S50.** IR spectrum of compound **5**.

NB\_25\_Pos #5007 RT: 11.80 AV: 1 NL: 9.62E7  
T: FTMS + p ESI Full ms [70.0000-1200.0000]

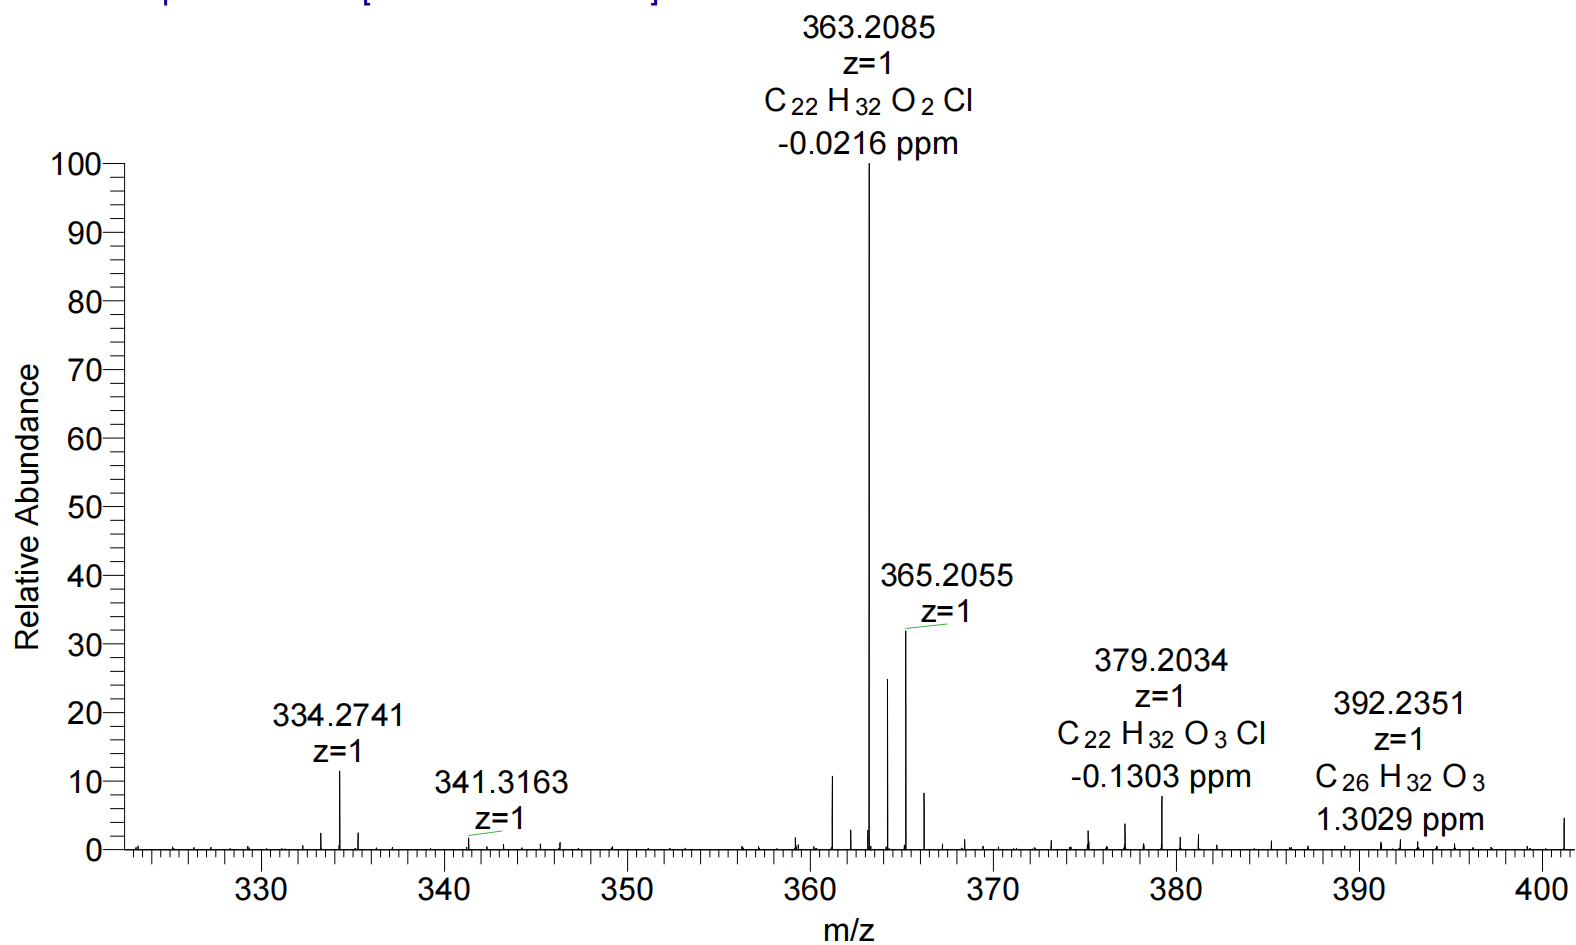

**Figure S51.** HR-ESIMS of compound 5.

**Table S1.** Bacterial strains used in the antimicrobial screening assays.

| Strains                                                          | Number    | Closes sequence strain                                      | Similarity |
|------------------------------------------------------------------|-----------|-------------------------------------------------------------|------------|
| <i>Staphylococcus aureus</i>                                     | MMBC-1011 | <i>Staphylococcus aureus</i><br>ATCC29213                   | 100%       |
| Methicillin-resistant<br><i>Staphylococcus aureus</i>            | MMBC-1010 | <i>Staphylococcus aureus</i> strain 2-<br>356MR             | 100%       |
| Methicillin-resistant coagulase<br>negative <i>staphylococci</i> | MMBC-1009 | <i>Staphylococcus epidermidis</i> strain<br>sESURV_p1_1200. | 100%       |
| <i>Bacillus cereus</i>                                           | MMBC-1007 | <i>Bacillus cereus</i> strain<br>FDAARGOS_797               | 99.93%     |

**Table S2.** Cartesian coordinates of the low energy reoptimized conformers of **1** calculated at B3LYP/6 31+G(d) level of theory.

| Conformer A |      | Standard Orientation<br>(Ångstroms) |             |             |
|-------------|------|-------------------------------------|-------------|-------------|
| I           | Atom | X                                   | Y           | Z           |
| 1           | C    | 3.87990100                          | -1.14121200 | -0.47031800 |
| 2           | C    | 4.62683400                          | 0.06640800  | -0.58604700 |
| 3           | C    | 4.05770200                          | 1.30543300  | -0.15152900 |
| 4           | C    | 2.77160800                          | 1.28217700  | 0.37850100  |
| 5           | C    | 2.04152400                          | 0.07365300  | 0.50229100  |
| 6           | C    | 2.58591700                          | -1.14494200 | 0.06848700  |
| 7           | O    | 4.38617700                          | -2.31904500 | -0.88232000 |
| 8           | O    | 0.79609900                          | 0.14550300  | 0.99619000  |
| 9           | C    | 5.95379000                          | 0.01863900  | -1.15915600 |
| 10          | H    | 6.50854900                          | 0.96240600  | -1.24228100 |
| 11          | O    | 6.50645100                          | -1.02345300 | -1.56746300 |
| 12          | Cl   | 1.97338200                          | 2.75197600  | 0.93467000  |
| 13          | C    | 4.84753700                          | 2.59041600  | -0.26809600 |
| 14          | C    | 1.75399300                          | -2.33986800 | 0.15129900  |
| 15          | C    | 0.56859100                          | -2.29627900 | 0.77542700  |
| 16          | C    | 0.07916200                          | -1.05564900 | 1.48133300  |
| 17          | C    | -1.40977300                         | -0.76491000 | 1.21051900  |
| 18          | C    | 0.34879300                          | -1.15243000 | 2.99068200  |
| 19          | C    | -1.77232800                         | -0.64870200 | -0.27679900 |
| 20          | C    | -3.24361400                         | -0.27585500 | -0.62211700 |
| 21          | C    | -4.25128100                         | -1.30985300 | -0.00432100 |
| 22          | C    | -5.71808400                         | -0.94117600 | -0.29992600 |
| 23          | C    | -6.07775600                         | 0.49076800  | 0.14098900  |
| 24          | C    | -5.05430900                         | 1.49157000  | -0.34991700 |
| 25          | C    | -3.60079300                         | 1.15003700  | -0.03358900 |
| 26          | O    | -5.37946200                         | 2.50755100  | -0.95601500 |
| 27          | C    | -2.65339500                         | 2.29331900  | -0.41564700 |
| 28          | C    | -3.34160800                         | -0.24647400 | -2.16505800 |
| 29          | C    | -4.00237800                         | -2.77413900 | -0.40675500 |
| 30          | H    | 5.29813500                          | -2.13866600 | -1.24236300 |
| 31          | H    | 4.29849300                          | 3.43211500  | 0.15150000  |
| 32          | H    | 5.80306900                          | 2.51912900  | 0.26262000  |

|    |   |             |             |             |
|----|---|-------------|-------------|-------------|
| 33 | H | 5.06663300  | 2.82662400  | -1.31582600 |
| 34 | H | 2.11338500  | -3.25085800 | -0.31552300 |
| 35 | H | -0.06793000 | -3.17507000 | 0.83960200  |
| 36 | H | -1.66080500 | 0.15673900  | 1.74901100  |
| 37 | H | -1.97887100 | -1.57111400 | 1.68869400  |
| 38 | H | -0.17117900 | -2.02174000 | 3.40828800  |
| 39 | H | 1.42026400  | -1.27006500 | 3.18318100  |
| 40 | H | -0.00833200 | -0.25186900 | 3.50253800  |
| 41 | H | -1.54148200 | -1.59791500 | -0.77540000 |
| 42 | H | -1.11124000 | 0.08972200  | -0.74279000 |
| 43 | H | -4.12810300 | -1.24994000 | 1.08754900  |
| 44 | H | -5.92533100 | -1.05611500 | -1.37171600 |
| 45 | H | -6.37880500 | -1.64766100 | 0.21697100  |
| 46 | H | -7.07172900 | 0.78641600  | -0.20912900 |
| 47 | H | -6.08101700 | 0.53694100  | 1.24040000  |
| 48 | H | -3.57522100 | 1.03977800  | 1.06164500  |
| 49 | H | -2.60994500 | 2.45007700  | -1.49780300 |
| 50 | H | -1.63866200 | 2.10491000  | -0.05429100 |
| 51 | H | -2.99812200 | 3.22976200  | 0.03472200  |
| 52 | H | -2.61895800 | 0.45916600  | -2.58821800 |
| 53 | H | -3.11660700 | -1.23064100 | -2.58954200 |
| 54 | H | -4.33376800 | 0.04943500  | -2.52269000 |
| 55 | H | -3.00098900 | -3.12141200 | -0.13315500 |
| 56 | H | -4.13042200 | -2.92967000 | -1.48444100 |
| 57 | H | -4.72282900 | -3.42411400 | 0.10441100  |

| Conformer B |      | Standard Orientation<br>(Ångstroms) |             |             |
|-------------|------|-------------------------------------|-------------|-------------|
| I           | Atom | X                                   | Y           | Z           |
| 1           | C    | -3.59561400                         | 0.56626200  | -1.20993900 |
| 2           | C    | -4.20403600                         | -0.58076300 | -0.62360200 |
| 3           | C    | -3.69927500                         | -1.11030200 | 0.60618800  |
| 4           | C    | -2.60700300                         | -0.47619400 | 1.19000500  |
| 5           | C    | -1.99343300                         | 0.64960500  | 0.58669300  |
| 6           | C    | -2.49447900                         | 1.19013800  | -0.60752600 |
| 7           | O    | -4.06215400                         | 1.09710600  | -2.35605900 |
| 8           | O    | -0.95971600                         | 1.21746200  | 1.22839800  |
| 9           | C    | -5.34393000                         | -1.18318000 | -1.27923900 |
| 10          | H    | -5.79995400                         | -2.06233200 | -0.80549200 |
| 11          | O    | -5.84378100                         | -0.76631900 | -2.34422100 |
| 12          | Cl   | -1.92107300                         | -1.03099000 | 2.71563000  |
| 13          | C    | -4.34416000                         | -2.32546400 | 1.23542500  |
| 14          | C    | -1.88461800                         | 2.41343400  | -1.11632200 |
| 15          | C    | -0.75833400                         | 2.88595500  | -0.56372800 |
| 16          | C    | -0.03552800                         | 2.14315800  | 0.53486600  |
| 17          | C    | 1.11302200                          | 1.30469700  | -0.08172700 |
| 18          | C    | 0.43018600                          | 3.10400000  | 1.63102800  |
| 19          | C    | 1.96433600                          | 0.50727600  | 0.91845800  |
| 20          | C    | 3.09222100                          | -0.39012500 | 0.32525400  |
| 21          | C    | 2.51190100                          | -1.46037000 | -0.66692800 |

|    |   |             |             |             |
|----|---|-------------|-------------|-------------|
| 22 | C | 3.61686000  | -2.33122300 | -1.29593400 |
| 23 | C | 4.71583700  | -1.49989800 | -1.98562000 |
| 24 | C | 5.21311800  | -0.39244100 | -1.08288700 |
| 25 | C | 4.12904000  | 0.49646500  | -0.47885200 |
| 26 | O | 6.40767600  | -0.22514000 | -0.85841800 |
| 27 | C | 4.73292500  | 1.68407200  | 0.28022300  |
| 28 | C | 3.79632900  | -1.06249000 | 1.52676300  |
| 29 | C | 1.42297800  | -2.36914000 | -0.07060100 |
| 30 | H | -4.84148400 | 0.54492600  | -2.64146800 |
| 31 | H | -4.35217900 | -3.17438600 | 0.54332500  |
| 32 | H | -3.81158900 | -2.63603800 | 2.13314900  |
| 33 | H | -5.38251700 | -2.11933000 | 1.52000300  |
| 34 | H | -2.37800200 | 2.93545700  | -1.92948100 |
| 35 | H | -0.29854400 | 3.80692200  | -0.91286000 |
| 36 | H | 1.73859700  | 2.00851200  | -0.64615500 |
| 37 | H | 0.65877600  | 0.63761400  | -0.82371000 |
| 38 | H | 1.20761600  | 3.76812500  | 1.23845700  |
| 39 | H | -0.40709300 | 3.71780700  | 1.97778300  |
| 40 | H | 0.83761700  | 2.55874800  | 2.48650900  |
| 41 | H | 1.30452200  | -0.12922500 | 1.51821500  |
| 42 | H | 2.43005100  | 1.19756000  | 1.62964000  |
| 43 | H | 2.04850300  | -0.90196200 | -1.49368400 |
| 44 | H | 4.07084500  | -2.97385100 | -0.53060300 |
| 45 | H | 3.16707400  | -3.00593700 | -2.03436700 |
| 46 | H | 5.56074200  | -2.12171200 | -2.29766700 |
| 47 | H | 4.29540000  | -1.02690600 | -2.88570300 |
| 48 | H | 3.57871700  | 0.89165900  | -1.34702400 |
| 49 | H | 5.43578200  | 2.22065900  | -0.36522700 |
| 50 | H | 5.28571700  | 1.36790000  | 1.17005400  |
| 51 | H | 3.96057200  | 2.39368700  | 0.59000700  |
| 52 | H | 4.18065000  | -0.31095600 | 2.22437500  |
| 53 | H | 3.09710400  | -1.69300800 | 2.08603100  |
| 54 | H | 4.64195500  | -1.69087700 | 1.22680300  |
| 55 | H | 0.56821700  | -1.80441900 | 0.31398400  |
| 56 | H | 1.81076700  | -2.99070300 | 0.74507400  |
| 57 | H | 1.04411100  | -3.04681000 | -0.84526400 |

| Conformer C |      | Standard Orientation<br>(Ångstroms) |             |             |
|-------------|------|-------------------------------------|-------------|-------------|
| I           | Atom | X                                   | Y           | Z           |
| 1           | C    | -3.30752000                         | 1.18213000  | 0.76431900  |
| 2           | C    | -4.12303600                         | 0.96772900  | -0.38394900 |
| 3           | C    | -3.94460300                         | -0.20681600 | -1.18170600 |
| 4           | C    | -2.95540000                         | -1.10921200 | -0.80266100 |
| 5           | C    | -2.13462600                         | -0.87642900 | 0.32811900  |
| 6           | C    | -2.31610600                         | 0.26116600  | 1.13003800  |
| 7           | O    | -3.46576700                         | 2.26894000  | 1.54283800  |
| 8           | O    | -1.22197400                         | -1.80876200 | 0.64692000  |
| 9           | C    | -5.13592200                         | 1.94521900  | -0.71761300 |
| 10          | H    | -5.75286800                         | 1.75864200  | -1.60629800 |



|    |    |             |             |             |
|----|----|-------------|-------------|-------------|
| 11 | O  | -5.35433800 | 2.98333300  | -0.06026500 |
| 12 | Cl | -2.65885100 | -2.59291400 | -1.70665900 |
| 13 | C  | -4.81004800 | -0.43956700 | -2.40046100 |
| 14 | C  | -1.51460500 | 0.37762100  | 2.34286700  |
| 15 | C  | -0.48501400 | -0.45561200 | 2.55418900  |
| 16 | C  | -0.06991300 | -1.47481400 | 1.51945700  |
| 17 | C  | 1.02961300  | -0.93630400 | 0.56966800  |
| 18 | C  | 0.30418600  | -2.81157500 | 2.16016100  |
| 19 | C  | 2.34772200  | -0.55756000 | 1.26501400  |
| 20 | C  | 3.46319000  | 0.05623000  | 0.36659800  |
| 21 | C  | 3.84933100  | -0.91944900 | -0.80196900 |
| 22 | C  | 4.92687700  | -0.32048800 | -1.72634900 |
| 23 | C  | 4.53426500  | 1.05975600  | -2.28727300 |
| 24 | C  | 4.04920300  | 1.98266200  | -1.19064800 |
| 25 | C  | 2.96272200  | 1.40937100  | -0.28418500 |
| 26 | O  | 4.49887900  | 3.11533800  | -1.04973800 |
| 27 | C  | 2.42128400  | 2.46499200  | 0.68711000  |
| 28 | C  | 4.67081900  | 0.33352600  | 1.29177500  |
| 29 | C  | 4.28403400  | -2.32552400 | -0.35271200 |
| 30 | H  | -4.20762700 | 2.80754200  | 1.15124400  |
| 31 | H  | -4.71164200 | 0.38085300  | -3.11988100 |
| 32 | H  | -4.53532500 | -1.36136600 | -2.91110700 |
| 33 | H  | -5.86831900 | -0.51481200 | -2.12578700 |
| 34 | H  | -1.79232200 | 1.13003200  | 3.07371400  |
| 35 | H  | 0.09945100  | -0.40729700 | 3.46857500  |
| 36 | H  | 0.61127700  | -0.06336800 | 0.05381000  |
| 37 | H  | 1.19963400  | -1.70754900 | -0.19075200 |
| 38 | H  | 1.15108000  | -2.68414700 | 2.84090500  |
| 39 | H  | -0.53930600 | -3.20678700 | 2.73484800  |
| 40 | H  | 0.58179700  | -3.54097100 | 1.39205700  |
| 41 | H  | 2.76918800  | -1.44377500 | 1.75271100  |
| 42 | H  | 2.13921000  | 0.15000300  | 2.07535800  |
| 43 | H  | 2.94504000  | -1.04286000 | -1.41636600 |
| 44 | H  | 5.88072600  | -0.23935200 | -1.18927100 |
| 45 | H  | 5.10461300  | -1.00570400 | -2.56400500 |
| 46 | H  | 5.36458800  | 1.53366100  | -2.82006300 |
| 47 | H  | 3.70547600  | 0.93363400  | -2.99996000 |
| 48 | H  | 2.14905200  | 1.13192300  | -0.97221700 |
| 49 | H  | 2.11156900  | 3.35703500  | 0.13324700  |
| 50 | H  | 3.17341900  | 2.78064000  | 1.41665700  |
| 51 | H  | 1.54832400  | 2.09375000  | 1.23142900  |
| 52 | H  | 4.38536600  | 0.99175300  | 2.11907900  |
| 53 | H  | 5.04619700  | -0.59534200 | 1.73410700  |
| 54 | H  | 5.50559000  | 0.81190700  | 0.76826100  |
| 55 | H  | 3.51096900  | -2.83932000 | 0.22755100  |
| 56 | H  | 5.19811500  | -2.29778500 | 0.25189700  |

**Table S3.** Cartesian coordinates of the low energy reoptimized conformers of **2** calculated at B3LYP/6 31+G(d) level of theory.

| Conformer A |      | Standard Orientation<br>(Ångstroms) |             |             |
|-------------|------|-------------------------------------|-------------|-------------|
| I           | Atom | X                                   | Y           | Z           |
| 1           | C    | -3.85042800                         | -1.30145700 | -0.33766500 |
| 2           | C    | -4.67999500                         | -0.16891200 | -0.57981200 |
| 3           | C    | -4.19411200                         | 1.14811300  | -0.30195100 |
| 4           | C    | -2.90691300                         | 1.27387000  | 0.21057800  |
| 5           | C    | -2.09571500                         | 0.14001600  | 0.46549000  |
| 6           | C    | -2.55595300                         | -1.15468200 | 0.17974000  |
| 7           | O    | -4.27679800                         | -2.55062400 | -0.60392500 |
| 8           | O    | -0.85687100                         | 0.35222100  | 0.93504600  |
| 9           | C    | -6.00741100                         | -0.37287300 | -1.11639400 |
| 10          | H    | -6.62790800                         | 0.51501100  | -1.29532800 |
| 11          | O    | -6.49116400                         | -1.49045900 | -1.39032600 |
| 12          | Cl   | -2.20793100                         | 2.84888800  | 0.58192800  |
| 13          | C    | -5.07116600                         | 2.35391700  | -0.55761600 |
| 14          | C    | -1.64151500                         | -2.27186600 | 0.38588000  |
| 15          | C    | -0.46154200                         | -2.07631200 | 0.99109200  |
| 16          | C    | -0.06437500                         | -0.73394000 | 1.55484900  |
| 17          | C    | 1.40374100                          | -0.37085400 | 1.25876300  |
| 18          | C    | -0.34337900                         | -0.68032100 | 3.06474700  |
| 19          | C    | 1.76975200                          | -0.37092300 | -0.23222800 |
| 20          | C    | 3.22974700                          | 0.02024800  | -0.60582800 |
| 21          | C    | 3.58301000                          | 1.45874700  | -0.08215300 |
| 22          | C    | 5.03503400                          | 1.85657500  | -0.40955700 |
| 23          | C    | 6.06493300                          | 0.83291900  | 0.10553200  |
| 24          | C    | 5.68520100                          | -0.57679800 | -0.29163200 |
| 25          | C    | 4.25580700                          | -0.99255300 | 0.04828800  |
| 26          | O    | 6.47921700                          | -1.33013400 | -0.84602200 |
| 27          | C    | 4.01761200                          | -2.47832900 | -0.24612200 |
| 28          | C    | 3.32688100                          | -0.05660600 | -2.14719100 |
| 29          | C    | 2.62730700                          | 2.56942700  | -0.55192400 |
| 30          | H    | -5.20268600                         | -2.47571600 | -0.96575700 |
| 31          | H    | -4.56500400                         | 3.27775700  | -0.28152800 |
| 32          | H    | -5.34382800                         | 2.42819300  | -1.61643600 |
| 33          | H    | -6.00001500                         | 2.29818900  | 0.02084800  |
| 34          | H    | -1.93574700                         | -3.25169900 | 0.02476900  |
| 35          | H    | 0.23471800                          | -2.89632900 | 1.14672700  |
| 36          | H    | 1.58895600                          | 0.61169700  | 1.70722800  |
| 37          | H    | 2.02181300                          | -1.08887300 | 1.81230200  |
| 38          | H    | 0.23262300                          | -1.45740400 | 3.57930400  |
| 39          | H    | -0.05733200                         | 0.29540600  | 3.47299000  |
| 40          | H    | -1.40578200                         | -0.85287700 | 3.26601000  |
| 41          | H    | 1.56222100                          | -1.36265100 | -0.65121100 |
| 42          | H    | 1.09302900                          | 0.31106500  | -0.75875200 |
| 43          | H    | 3.51285800                          | 1.41713700  | 1.01500400  |
| 44          | H    | 5.15602200                          | 1.98430800  | -1.49301500 |
| 45          | H    | 5.25140800                          | 2.83335400  | 0.03982300  |

|    |   |            |             |             |
|----|---|------------|-------------|-------------|
| 46 | H | 7.07401700 | 1.05271800  | -0.25688500 |
| 47 | H | 6.08682000 | 0.86991500  | 1.20505600  |
| 48 | H | 4.17517900 | -0.84378300 | 1.13649500  |
| 49 | H | 4.07068500 | -2.70139600 | -1.31606900 |
| 50 | H | 3.04270900 | -2.80687500 | 0.12454600  |
| 51 | H | 4.78190000 | -3.08444800 | 0.25083900  |
| 52 | H | 2.64180100 | 0.65639000  | -2.61790500 |
| 53 | H | 3.05006700 | -1.05352300 | -2.50603700 |
| 54 | H | 4.33438700 | 0.15587600  | -2.52093700 |
| 55 | H | 2.64878100 | 2.69462200  | -1.64093100 |
| 56 | H | 2.92825000 | 3.52602900  | -0.10780700 |

| Conformer B |      | Standard Orientation<br>(Ångstroms) |             |             |
|-------------|------|-------------------------------------|-------------|-------------|
| I           | Atom | X                                   | Y           | Z           |
| 1           | C    | 3.50778800                          | 0.38925600  | -1.24586800 |
| 2           | C    | 4.05574600                          | -0.72346600 | -0.54497800 |
| 3           | C    | 3.53232400                          | -1.09297700 | 0.73450900  |
| 4           | C    | 2.47977200                          | -0.34308400 | 1.25027200  |
| 5           | C    | 1.92293600                          | 0.74467600  | 0.53297100  |
| 6           | C    | 2.44602200                          | 1.13147900  | -0.71052200 |
| 7           | O    | 3.99543400                          | 0.77282100  | -2.44086100 |
| 8           | O    | 0.92289300                          | 1.43004300  | 1.11091500  |
| 9           | C    | 5.15246700                          | -1.45628100 | -1.13897400 |
| 10          | H    | 5.55919400                          | -2.30946100 | -0.58034200 |
| 11          | O    | 5.66636700                          | -1.18014100 | -2.24227800 |
| 12          | Cl   | 1.77567600                          | -0.69811400 | 2.82625200  |
| 13          | C    | 4.11489900                          | -2.26912400 | 1.48665300  |
| 14          | C    | 1.90175800                          | 2.32852500  | -1.34154600 |
| 15          | C    | 0.80258000                          | 2.91234300  | -0.84322900 |
| 16          | C    | 0.04203300                          | 2.31763800  | 0.31836900  |
| 17          | C    | -1.13931200                         | 1.47202500  | -0.22101800 |
| 18          | C    | -0.38916800                         | 3.40295900  | 1.30683700  |
| 19          | C    | -2.03952200                         | 0.83044000  | 0.84604800  |
| 20          | C    | -3.18140900                         | -0.09920300 | 0.33509300  |
| 21          | C    | -4.13043900                         | 0.66617800  | -0.65541600 |
| 22          | C    | -5.25053200                         | -0.23811900 | -1.20467900 |
| 23          | C    | -4.71120000                         | -1.52081800 | -1.86615100 |
| 24          | C    | -3.71098700                         | -2.21971800 | -0.97153100 |
| 25          | C    | -2.58047200                         | -1.34182600 | -0.44028100 |
| 26          | O    | -3.80693500                         | -3.41214900 | -0.69920100 |
| 27          | C    | -1.53509400                         | -2.16754300 | 0.31823800  |
| 28          | C    | -3.94748000                         | -0.58472600 | 1.58759900  |
| 29          | C    | -4.74671000                         | 1.95838200  | -0.09091500 |
| 30          | H    | 4.74024200                          | 0.15087800  | -2.66920900 |
| 31          | H    | 3.58585100                          | -2.44194600 | 2.42267400  |
| 32          | H    | 4.05257400                          | -3.18903600 | 0.89513100  |
| 33          | H    | 5.17061500                          | -2.10071400 | 1.72821200  |
| 34          | H    | 2.42205600                          | 2.74068900  | -2.19981200 |
| 35          | H    | 0.39228000                          | 3.81776300  | -1.28299000 |

|    |   |             |             |             |
|----|---|-------------|-------------|-------------|
| 36 | H | -1.72319100 | 2.13842100  | -0.86818900 |
| 37 | H | -0.71094800 | 0.70629600  | -0.87953600 |
| 38 | H | -1.13911900 | 4.05234300  | 0.84252300  |
| 39 | H | -0.82093300 | 2.96365500  | 2.21007400  |
| 40 | H | 0.47004000  | 4.01648700  | 1.59560900  |
| 41 | H | -1.41584100 | 0.26212200  | 1.54422800  |
| 42 | H | -2.50714700 | 1.61846400  | 1.44645500  |
| 43 | H | -3.51206700 | 0.95432100  | -1.51877600 |
| 44 | H | -5.94698200 | -0.50626000 | -0.39966400 |
| 45 | H | -5.83710900 | 0.32164600  | -1.94322100 |
| 46 | H | -5.51649300 | -2.21595500 | -2.12330700 |
| 47 | H | -4.18912600 | -1.25092100 | -2.79633400 |
| 48 | H | -2.10127200 | -0.93370700 | -1.34366000 |
| 49 | H | -1.93984000 | -2.60301600 | 1.23689600  |
| 50 | H | -0.66379300 | -1.56199700 | 0.58133100  |
| 51 | H | -1.18739300 | -2.99539900 | -0.30813900 |
| 52 | H | -4.39572100 | 0.25873300  | 2.12327500  |
| 53 | H | -3.27143400 | -1.08749800 | 2.28709600  |
| 54 | H | -4.75112700 | -1.28939400 | 1.34772100  |
| 55 | H | -5.40524400 | 1.75878700  | 0.76256400  |
| 56 | H | -5.35338500 | 2.44514400  | -0.86406500 |

| Conformer C |      | Standard Orientation<br>(Ångstroms) |             |             |
|-------------|------|-------------------------------------|-------------|-------------|
| I           | Atom | X                                   | Y           | Z           |
| 1           | C    | -3.49845400                         | -1.18752500 | 0.52617900  |
| 2           | C    | -4.27547800                         | -0.70356500 | -0.56542000 |
| 3           | C    | -3.98357800                         | 0.57246000  | -1.14363600 |
| 4           | C    | -2.92647500                         | 1.30407500  | -0.61076100 |
| 5           | C    | -2.14610400                         | 0.80507200  | 0.46100200  |
| 6           | C    | -2.43642000                         | -0.43632600 | 1.04805100  |
| 7           | O    | -3.76188000                         | -2.37622000 | 1.10077800  |
| 8           | O    | -1.16212200                         | 1.58396800  | 0.93963600  |
| 9           | C    | -5.36597600                         | -1.51306300 | -1.06371700 |
| 10          | H    | -5.95279900                         | -1.11849300 | -1.90350300 |
| 11          | O    | -5.68362900                         | -2.62702300 | -0.59929800 |
| 12          | Cl   | -2.49062500                         | 2.89261500  | -1.23759400 |
| 13          | C    | -4.80578800                         | 1.09086300  | -2.30287800 |
| 14          | C    | -1.66437800                         | -0.83698200 | 2.21867200  |
| 15          | C    | -0.57212100                         | -0.14576500 | 2.57605300  |
| 16          | C    | -0.05876200                         | 1.00649100  | 1.74542700  |
| 17          | C    | 1.01505900                          | 0.56036900  | 0.72099800  |
| 18          | C    | 0.40260700                          | 2.17213600  | 2.62106700  |
| 19          | C    | 2.26739700                          | -0.08045700 | 1.34211000  |
| 20          | C    | 3.38781000                          | -0.53095800 | 0.35707400  |
| 21          | C    | 2.83848900                          | -1.55747200 | -0.69675200 |
| 22          | C    | 3.92148600                          | -1.99268100 | -1.70273000 |
| 23          | C    | 4.59079200                          | -0.80072500 | -2.41364900 |
| 24          | C    | 5.02656200                          | 0.25722200  | -1.42354500 |
| 25          | C    | 3.95423000                          | 0.71519900  | -0.43773800 |

|    |   |             |             |             |
|----|---|-------------|-------------|-------------|
| 26 | O | 6.16496700  | 0.71446500  | -1.42234000 |
| 27 | C | 4.43765100  | 1.89555100  | 0.41323700  |
| 28 | C | 4.50775400  | -1.15582500 | 1.22119000  |
| 29 | C | 2.16704600  | -2.80396500 | -0.09410100 |
| 30 | H | -4.54226000 | -2.76963100 | 0.62123400  |
| 31 | H | -4.43398800 | 2.05257300  | -2.65334600 |
| 32 | H | -4.78069000 | 0.39619700  | -3.14954700 |
| 33 | H | -5.85483200 | 1.22546600  | -2.01528500 |
| 34 | H | -2.01356500 | -1.68330600 | 2.80107400  |
| 35 | H | -0.00534500 | -0.40917200 | 3.46458800  |
| 36 | H | 0.53243500  | -0.14678500 | 0.03635400  |
| 37 | H | 1.28195800  | 1.44629700  | 0.13160200  |
| 38 | H | 1.22670200  | 1.86039800  | 3.26963300  |
| 39 | H | 0.74481500  | 3.00640300  | 1.99984200  |
| 40 | H | -0.41884000 | 2.51822000  | 3.25614300  |
| 41 | H | 2.71394000  | 0.61271700  | 2.06310000  |
| 42 | H | 1.96906500  | -0.95803300 | 1.92744200  |
| 43 | H | 2.06981700  | -1.02631800 | -1.27769300 |
| 44 | H | 4.68739800  | -2.59334400 | -1.19535800 |
| 45 | H | 3.46978000  | -2.64730100 | -2.45783700 |
| 46 | H | 5.45199500  | -1.11468800 | -3.01168000 |
| 47 | H | 3.86178600  | -0.33414100 | -3.09304000 |
| 48 | H | 3.12784400  | 1.07030600  | -1.07292000 |
| 49 | H | 5.24863000  | 1.61257300  | 1.09128000  |
| 50 | H | 3.62297300  | 2.31661300  | 1.00894900  |
| 51 | H | 4.81857400  | 2.69105800  | -0.23517800 |
| 52 | H | 4.14196500  | -2.03807400 | 1.75693100  |
| 53 | H | 4.86159900  | -0.44492900 | 1.97530100  |
| 54 | H | 5.37745100  | -1.46373100 | 0.63080000  |
| 55 | H | 2.87315100  | -3.40865900 | 0.48703300  |
| 56 | H | 1.77971700  | -3.43919700 | -0.89983100 |
| 57 | H | 1.32257300  | -2.55377300 | 0.55600700  |
